# Supplementary material
Source: MDPI journal article supplement (https://www.mdpi.com/2071-1050/15/11/8890)
Supplement: s1 [file s1]

## Achieving Zero Stunting: A Sustainable Development Goal Interlinkage Approach at District Level

Ahmad Komarulzaman, Robi Andoyo, Zuzy Anna, Aisyah Amatul Ghina, Putri Riswani Halim, Herlina Napitupulu, Monica Ruth Karunia, and Annisa Andriani

**Table S1. List of SDGs Indicators**

| No | Code      | Name                                                                                                                                                    | Shortname                                        | Source         |
|----|-----------|---------------------------------------------------------------------------------------------------------------------------------------------------------|--------------------------------------------------|----------------|
| 1  | 1.2.1     | Proportion of population living below the national poverty line                                                                                         | Poverty                                          | SUSENAS Kor    |
| 2  | 1.4.1.(a) | Percentage of ever-married women aged 15-49 who gave birth in a health facility (40% lowest population/lowest income)                                   | Birth in Health Facility (B40)                   | SUSENAS Kor    |
| 3  | 1.4.1.(f) | The percentage of urban slum households (40% lowest population/lowest income)                                                                           | Urban Slum Households (B40)                      | SUSENAS Kor    |
| 4  | 1.4.1.(g) | Net Enrollment Rate (APM) Primary School/MI/Equivalent (the lowest 40% level)                                                                           | Net Enrollment Rate Primary School (B40)         | SUSENAS Kor    |
| 5  | 1.4.1.(h) | Net Enrollment Rate (APM) Lower-secondary School/MTs/Equivalent (the lowest 40% level)                                                                  | Net Enrollment Rate Lower-secondary School (B40) | SUSENAS Kor    |
| 6  | 1.4.1.(i) | Net Enrollment Rate (APM) Upper-secondary School/Vocational School/MA/Equivalent (the lowest 40% level)                                                 | Net Enrollment Rate Upper-secondary School (B40) | SUSENAS Kor    |
| 7  | 1.4.1.(j) | Percentage of population aged 0-17 years old that own birth certificates (the lowest 40% level)                                                         | Birth Certificate (B40)                          | SUSENAS Kor    |
| 8  | 1.4.1.(k) | Percentage of poor and vulnerable households whose the main source of lighting is electricity from PLN or not PLN (40% lowest population/lowest income) | Electricity (B40)                                | SUSENAS Kor    |
| 9  | 2.1.1.(a) | The prevalence of malnutrition (underweight) in children under 5 years of age                                                                           | Underweight                                      | RISKESDAS, PSG |
| 10 | 2.2.1     | Prevalence of stunting among children under 5 years of age                                                                                              | Stunting                                         | RISKESDAS, PSG |
| 11 | 2.2.2     | Prevalence of malnutrition (weight/height) among children under 5 years of age, Wasting                                                                 | Wasting                                          | RISKESDAS, PSG |
| 12 | 2.2.2     | Prevalence of malnutrition (weight/height) among children under 5 years of age, Overweight                                                              | Overweight                                       | RISKESDAS, PSG |
| 13 | 3.1.2     | Proportion of ever-married women aged 15-49 years whose last birth process was (a) attended by skilled health personnel                                 | Birth by Skilled Health Personnel                | SUSENAS Kor    |

| No | Code      | Name                                                                                                               | Shortname                                                      | Source      |
|----|-----------|--------------------------------------------------------------------------------------------------------------------|----------------------------------------------------------------|-------------|
| 14 | 3.1.2.(a) | Proportion of births among ever married women aged 15–49 years whose last birth process was (b) at health facility | Birth at Health Facility                                       | SUSENAS Kor |
| 15 | 3.8.1.(a) | Unmet need health services                                                                                         | Unmet Need in Health Services                                  | SUSENAS Kor |
| 16 | 3.8.2     | The number of people covered by health insurance or the public health system per 1000 people                       | Health Insurance                                               | SUSENAS Kor |
| 17 | 3.a.1     | Age-standardized prevalence of current tobacco use among persons aged 15 years and older                           | Smoking                                                        | SUSENAS Kor |
| 18 | 4.1.1.(d) | Gross Enrollment Rate (APK) of Primary school/MI/equivalent                                                        | Gross Enrollment Rate of Primary School                        | SUSENAS Kor |
| 19 | 4.1.1.(e) | Gross Enrollment Rate (APK) of Lower-secondary School/MTs/equivalent                                               | Gross Enrollment Rate of Lower-secondary School                | SUSENAS Kor |
| 20 | 4.1.1.(f) | Gross Enrollment Rate (APK) of Upper-secondary School/Vocational School/MA/equivalent                              | Gross Enrollment Rate of Upper-secondary School                | SUSENAS Kor |
| 21 | 4.1.1.(g) | Average School Life Age 15 Years and Above by Province                                                             | Mean Year School                                               | SUSENAS Kor |
| 22 | 4.2.2.(a) | Gross Enrollment Rate (APK) Early Childhood Education (PAUD)                                                       | Gross Enrolment Rate of Early Childhood Education              | SUSENAS Kor |
| 23 | 4.3.1.(b) | Gross Enrollment Rate (APK) of University (PT)                                                                     | Gross Enrollment Rate of University                            | SUSENAS Kor |
| 24 | 4.4.1     | The Proportion of Youth with Information and Communications Technology (ICT) Skills                                | Youth with ICT                                                 | SUSENAS Kor |
| 25 | 4.4.1     | The Proportion of Adults with Information and Communications Technology (ICT) Skills                               | Adults with ICT                                                | SUSENAS Kor |
| 26 | 4.5.1     | Gender gap (F/M) Net Enrollment Rate of Primary School                                                             | Gender gap (F/M) Net Enrollment Rate of Primary School         | SUSENAS Kor |
| 27 | 4.5.1     | Gender gap (F/M) Net Enrollment Rate of Lower-secondary School                                                     | Gender gap (F/M) Net Enrollment Rate of Lower-secondary School | SUSENAS Kor |
| 28 | 4.5.1     | Gender Gap (F/M) Net Enrolment Rate Upper-secondary School                                                         | Gender Gap (F/M) Net Enrolment Rate Upper-secondary School     | SUSENAS Kor |
| 29 | 4.5.1     | Gender Gap (F/M) Net Enrolment Rate of University                                                                  | Gender Gap (F/M) Net Enrolment Rate of University              | SUSENAS Kor |
| 30 | 4.6.1.(a) | Literacy rates among population aged 15 years and above                                                            | Literacy Rate $\geq 15$                                        | SUSENAS Kor |
| 31 | 4.6.1.(b) | Percentage of literacy rate of population 15-59 years (%)                                                          | Literacy Rate 15-24                                            | SUSENAS Kor |
| 32 | 4.6.1.(b) | Percentage of literacy rate of population 15-24 years (%)                                                          | Literacy Rate 15-59                                            | SUSENAS Kor |
| 33 | 5.3.1     | Proportion of women aged 20–24 years who were married or in a union before age 15                                  | Married Women <15                                              | SUSENAS Kor |
| 34 | 5.3.1     | Proportion of women aged 20–24 years who were married or in a union before age 18                                  | Married Women <18                                              | SUSENAS Kor |

| No | Code       | Name                                                                                               | Shortname                                     | Source        |
|----|------------|----------------------------------------------------------------------------------------------------|-----------------------------------------------|---------------|
| 35 | 6.1.1.(a)  | Proportion of households using safely managed drinking water services                              | Acces to Safely Drinking Water                | SUSENAS Kor   |
| 36 | 6.2.1.(b)  | Proportion of households using improved sanitation services                                        | Sanitation                                    | SUSENAS Kor   |
| 37 | 7.1.2.(b)  | Ratio of household use gas                                                                         | Household Gas                                 | SUSENAS Kor   |
| 38 | 8.1.1      | Annual growth rate of GDP per capita                                                               | Annual growth rate of GDP per capita          | BPS           |
| 39 | 8.1.1.(a)  | GDP per capita                                                                                     | GDP per capita                                | BPS           |
| 40 | 8.2.1      | Annual growth rate of GDP per employed person                                                      | Annual growth rate of GDP per employed person | BPS, SAKERNAS |
| 41 | 8.3.1      | Proportion of informal employment in total employment                                              | Informal Employment (%)                       | SAKERNAS      |
| 42 | 8.3.1.(a)  | Percentage of formal employment                                                                    | Formal Employment (%)                         | SAKERNAS      |
| 43 | 8.3.1.(b)  | Percentage of informal employment in the agricultural sector                                       | Informal Agricultural Employment (%)          | SAKERNAS      |
| 44 | 8.5.1      | Average hourly earnings                                                                            | Hourly Earnings                               | SAKERNAS      |
| 45 | 8.5.2      | Unemployment rate                                                                                  | Unemployment Rate                             | SAKERNAS      |
| 46 | 8.5.2.(a)  | Underemployment rate                                                                               | Underemployment Rate                          | SAKERNAS      |
| 47 | 9.2.2      | Manufacturing employment as a proportion of total employment                                       | Manufacturing employment                      | SAKERNAS      |
| 48 | 9.c.1.(a)  | Proportion of individuals who own a mobile telephone                                               | Mobile phone                                  | SUSENAS Kor   |
| 49 | 10.1.1     | Gini Coefficient                                                                                   | Gini Coefficient                              | SUSENAS Kor   |
| 50 | 10.2.1     | Proportion of people living below 50 per cent of median income                                     | < 50% median income                           | SUSENAS Kor   |
| 51 | 11.1.1(a)  | Proportion of households that have access to improved and affordable housing                       | Adequate Housing                              | SUSENAS Kor   |
| 52 | 16.1.3.(a) | Proportion of population subjected to physical violence, in the previous 12 months                 | Physical Violence                             | SUSENAS Kor   |
| 53 | 16.9.1     | Proportion of children under 5 years of age whose births were registered by the civil registration | Birth Certificate < 5                         | SUSENAS Kor   |
| 54 | 17.8.1     | Proportion of individuals using the Internet                                                       | Access to Internet                            | SUSENAS Kor   |

Table S2. Proximity Matrix of (54 x 54) Indicators

| Indicator | 1    | 2    | 3    | 4    | 5    | 6    | 7    | 8    | 9    | 10   | 11   | 12   | 13   | 14   | 15   | 16   | 17   | 18   | 19   | 20   | 21   | 22   | 23   | 24   | 25   | 26   | 27   | 28   | 29   | 30   | 31   | 32   | 33   | 34   | 35   | 36   | 37   | 38   | 39   | 40   | 41   | 42   | 43   | 44   | 45   | 46   | 47   | 48     | 49   | 50   | 51   | 52   | 53   | 54   |      |      |
|-----------|------|------|------|------|------|------|------|------|------|------|------|------|------|------|------|------|------|------|------|------|------|------|------|------|------|------|------|------|------|------|------|------|------|------|------|------|------|------|------|------|------|------|------|------|------|------|------|--------|------|------|------|------|------|------|------|------|
| 1         | 0.00 | 0.41 | 0.39 | 0.41 | 0.39 | 0.37 | 0.40 | 0.43 | 0.42 | 0.37 | 0.43 | 0.36 | 0.38 | 0.39 | 0.43 | 0.33 | 0.38 | 0.38 | 0.39 | 0.38 | 0.40 | 0.39 | 0.40 | 0.49 | 0.49 | 0.42 | 0.34 | 0.22 | 0.22 | 0.46 | 0.46 | 0.46 | 0.40 | 0.34 | 0.40 | 0.39 | 0.44 | 0.21 | 0.40 | 0.38 | 0.43 | 0.46 | 0.33 | 0.47 | 0.38 | 0.45 | 0.40 | 0.54   | 0.47 | 0.57 | 0.40 | 0.48 | 0.41 | 0.50 |      |      |
| 2         | 0.41 | 0.00 | 0.45 | 0.56 | 0.53 | 0.56 | 0.66 | 0.73 | 0.45 | 0.46 | 0.48 | 0.47 | 0.81 | 0.92 | 0.47 | 0.49 | 0.42 | 0.40 | 0.49 | 0.50 | 0.42 | 0.52 | 0.48 | 0.64 | 0.56 | 0.57 | 0.31 | 0.24 | 0.25 | 0.48 | 0.60 | 0.54 | 0.57 | 0.39 | 0.57 | 0.63 | 0.65 | 0.30 | 0.30 | 0.51 | 0.33 | 0.44 | 0.24 | 0.30 | 0.44 | 0.49 | 0.55 | 0.46   | 0.42 | 0.36 | 0.61 | 0.49 | 0.64 | 0.53 |      |      |
| 3         | 0.39 | 0.45 | 0.00 | 0.37 | 0.41 | 0.37 | 0.42 | 0.41 | 0.38 | 0.45 | 0.38 | 0.38 | 0.44 | 0.44 | 0.37 | 0.32 | 0.43 | 0.32 | 0.38 | 0.36 | 0.29 | 0.48 | 0.33 | 0.47 | 0.41 | 0.36 | 0.32 | 0.18 | 0.23 | 0.28 | 0.37 | 0.32 | 0.39 | 0.39 | 0.44 | 0.45 | 0.42 | 0.29 | 0.34 | 0.40 | 0.35 | 0.36 | 0.20 | 0.29 | 0.43 | 0.45 | 0.44 | 0.35   | 0.37 | 0.41 | 0.46 | 0.44 | 0.42 | 0.41 |      |      |
| 4         | 0.41 | 0.56 | 0.37 | 0.00 | 0.54 | 0.53 | 0.59 | 0.61 | 0.39 | 0.40 | 0.38 | 0.46 | 0.55 | 0.55 | 0.39 | 0.41 | 0.37 | 0.58 | 0.40 | 0.47 | 0.44 | 0.43 | 0.44 | 0.46 | 0.42 | 0.67 | 0.33 | 0.23 | 0.25 | 0.63 | 0.66 | 0.65 | 0.62 | 0.36 | 0.40 | 0.51 | 0.64 | 0.18 | 0.33 | 0.49 | 0.34 | 0.44 | 0.29 | 0.33 | 0.42 | 0.35 | 0.42 | 0.44   | 0.51 | 0.42 | 0.47 | 0.47 | 0.58 | 0.40 |      |      |
| 5         | 0.39 | 0.53 | 0.41 | 0.54 | 0.00 | 0.62 | 0.58 | 0.59 | 0.47 | 0.50 | 0.45 | 0.41 | 0.57 | 0.54 | 0.50 | 0.44 | 0.44 | 0.37 | 0.60 | 0.51 | 0.51 | 0.46 | 0.48 | 0.56 | 0.49 | 0.48 | 0.38 | 0.22 | 0.25 | 0.47 | 0.51 | 0.49 | 0.51 | 0.41 | 0.47 | 0.54 | 0.50 | 0.24 | 0.35 | 0.47 | 0.38 | 0.49 | 0.26 | 0.34 | 0.44 | 0.45 | 0.51 | 0.49   | 0.51 | 0.41 | 0.54 | 0.53 | 0.56 | 0.47 |      |      |
| 6         | 0.37 | 0.56 | 0.37 | 0.53 | 0.62 | 0.00 | 0.60 | 0.58 | 0.45 | 0.47 | 0.41 | 0.41 | 0.60 | 0.55 | 0.47 | 0.47 | 0.42 | 0.40 | 0.51 | 0.63 | 0.59 | 0.47 | 0.52 | 0.55 | 0.50 | 0.50 | 0.37 | 0.23 | 0.25 | 0.55 | 0.56 | 0.55 | 0.54 | 0.43 | 0.51 | 0.57 | 0.50 | 0.25 | 0.37 | 0.43 | 0.35 | 0.45 | 0.25 | 0.37 | 0.42 | 0.40 | 0.46 | 0.51   | 0.48 | 0.44 | 0.58 | 0.48 | 0.58 | 0.48 |      |      |
| 7         | 0.40 | 0.66 | 0.42 | 0.59 | 0.58 | 0.60 | 0.00 | 0.66 | 0.47 | 0.47 | 0.48 | 0.45 | 0.68 | 0.66 | 0.45 | 0.50 | 0.46 | 0.42 | 0.47 | 0.54 | 0.46 | 0.56 | 0.46 | 0.63 | 0.55 | 0.55 | 0.34 | 0.25 | 0.24 | 0.56 | 0.59 | 0.61 | 0.58 | 0.36 | 0.53 | 0.60 | 0.63 | 0.27 | 0.32 | 0.53 | 0.36 | 0.48 | 0.27 | 0.33 | 0.45 | 0.47 | 0.46 | 0.54   | 0.47 | 0.42 | 0.58 | 0.52 | 0.86 | 0.53 |      |      |
| 8         | 0.43 | 0.73 | 0.41 | 0.61 | 0.59 | 0.58 | 0.66 | 0.00 | 0.43 | 0.46 | 0.47 | 0.47 | 0.69 | 0.69 | 0.43 | 0.45 | 0.39 | 0.40 | 0.49 | 0.50 | 0.46 | 0.48 | 0.48 | 0.65 | 0.56 | 0.59 | 0.33 | 0.26 | 0.23 | 0.54 | 0.69 | 0.60 | 0.60 | 0.38 | 0.55 | 0.63 | 0.72 | 0.29 | 0.31 | 0.52 | 0.35 | 0.49 | 0.26 | 0.33 | 0.39 | 0.50 | 0.57 | 0.51   | 0.41 | 0.35 | 0.61 | 0.48 | 0.65 | 0.55 |      |      |
| 9         | 0.42 | 0.45 | 0.38 | 0.39 | 0.47 | 0.45 | 0.47 | 0.43 | 0.00 | 0.69 | 0.67 | 0.34 | 0.47 | 0.46 | 0.48 | 0.39 | 0.33 | 0.33 | 0.45 | 0.39 | 0.34 | 0.39 | 0.37 | 0.49 | 0.45 | 0.39 | 0.33 | 0.27 | 0.21 | 0.42 | 0.44 | 0.44 | 0.42 | 0.31 | 0.37 | 0.38 | 0.42 | 0.28 | 0.34 | 0.43 | 0.35 | 0.35 | 0.27 | 0.36 | 0.44 | 0.49 | 0.40 | 0.45   | 0.36 | 0.41 | 0.41 | 0.40 | 0.50 | 0.43 |      |      |
| 10        | 0.37 | 0.46 | 0.45 | 0.40 | 0.50 | 0.47 | 0.47 | 0.46 | 0.69 | 0.00 | 0.50 | 0.40 | 0.47 | 0.46 | 0.50 | 0.42 | 0.35 | 0.36 | 0.46 | 0.41 | 0.38 | 0.44 | 0.37 | 0.51 | 0.47 | 0.40 | 0.32 | 0.29 | 0.23 | 0.41 | 0.46 | 0.45 | 0.44 | 0.37 | 0.42 | 0.45 | 0.44 | 0.30 | 0.36 | 0.42 | 0.33 | 0.41 | 0.26 | 0.31 | 0.41 | 0.48 | 0.48 | 0.42   | 0.38 | 0.37 | 0.47 | 0.40 | 0.48 | 0.46 |      |      |
| 11        | 0.43 | 0.48 | 0.38 | 0.38 | 0.45 | 0.41 | 0.41 | 0.48 | 0.47 | 0.67 | 0.50 | 0.00 | 0.37 | 0.48 | 0.49 | 0.45 | 0.42 | 0.35 | 0.33 | 0.45 | 0.40 | 0.32 | 0.46 | 0.38 | 0.48 | 0.44 | 0.40 | 0.31 | 0.25 | 0.25 | 0.36 | 0.41 | 0.40 | 0.39 | 0.32 | 0.38 | 0.41 | 0.45 | 0.33 | 0.31 | 0.46 | 0.32 | 0.36 | 0.25 | 0.33 | 0.46 | 0.48 | 0.46   | 0.39 | 0.33 | 0.37 | 0.41 | 0.41 | 0.50 | 0.43 |      |
| 12        | 0.36 | 0.47 | 0.38 | 0.46 | 0.41 | 0.41 | 0.45 | 0.47 | 0.34 | 0.40 | 0.37 | 0.00 | 0.43 | 0.46 | 0.42 | 0.42 | 0.38 | 0.46 | 0.40 | 0.45 | 0.46 | 0.47 | 0.49 | 0.41 | 0.40 | 0.45 | 0.31 | 0.25 | 0.27 | 0.45 | 0.44 | 0.44 | 0.42 | 0.31 | 0.44 | 0.46 | 0.44 | 0.23 | 0.30 | 0.45 | 0.30 | 0.44 | 0.21 | 0.30 | 0.40 | 0.35 | 0.47 | 0.42   | 0.41 | 0.34 | 0.43 | 0.42 | 0.43 | 0.39 |      |      |
| 13        | 0.38 | 0.81 | 0.44 | 0.55 | 0.57 | 0.60 | 0.68 | 0.69 | 0.47 | 0.47 | 0.48 | 0.43 | 0.00 | 0.82 | 0.48 | 0.45 | 0.44 | 0.39 | 0.48 | 0.55 | 0.46 | 0.51 | 0.48 | 0.66 | 0.59 | 0.54 | 0.31 | 0.26 | 0.23 | 0.50 | 0.59 | 0.54 | 0.57 | 0.42 | 0.58 | 0.64 | 0.63 | 0.30 | 0.31 | 0.50 | 0.34 | 0.48 | 0.25 | 0.30 | 0.43 | 0.47 | 0.54 | 0.48   | 0.45 | 0.38 | 0.64 | 0.47 | 0.68 | 0.54 |      |      |
| 14        | 0.39 | 0.92 | 0.44 | 0.55 | 0.54 | 0.55 | 0.66 | 0.69 | 0.46 | 0.46 | 0.49 | 0.46 | 0.82 | 0.00 | 0.48 | 0.48 | 0.43 | 0.39 | 0.49 | 0.51 | 0.41 | 0.53 | 0.48 | 0.65 | 0.58 | 0.55 | 0.31 | 0.24 | 0.24 | 0.46 | 0.58 | 0.51 | 0.57 | 0.43 | 0.60 | 0.64 | 0.65 | 0.30 | 0.31 | 0.51 | 0.34 | 0.46 | 0.26 | 0.31 | 0.45 | 0.51 | 0.55 | 0.47   | 0.42 | 0.37 | 0.62 | 0.47 | 0.66 | 0.54 |      |      |
| 15        | 0.43 | 0.47 | 0.37 | 0.39 | 0.50 | 0.47 | 0.45 | 0.43 | 0.48 | 0.50 | 0.45 | 0.42 | 0.48 | 0.48 | 0.00 | 0.49 | 0.38 | 0.39 | 0.46 | 0.47 | 0.49 | 0.33 | 0.42 | 0.48 | 0.49 | 0.42 | 0.34 | 0.25 | 0.22 | 0.44 | 0.40 | 0.43 | 0.44 | 0.43 | 0.44 | 0.46 | 0.43 | 0.25 | 0.39 | 0.42 | 0.45 | 0.50 | 0.28 | 0.44 | 0.40 | 0.48 | 0.41 | 0.41   | 0.47 | 0.47 | 0.45 | 0.50 | 0.47 | 0.50 |      |      |
| 16        | 0.33 | 0.49 | 0.32 | 0.41 | 0.44 | 0.47 | 0.50 | 0.45 | 0.39 | 0.42 | 0.42 | 0.42 | 0.45 | 0.48 | 0.49 | 0.00 | 0.42 | 0.43 | 0.45 | 0.44 | 0.51 | 0.46 | 0.47 | 0.44 | 0.48 | 0.44 | 0.48 | 0.42 | 0.35 | 0.22 | 0.26 | 0.41 | 0.41 | 0.42 | 0.41 | 0.38 | 0.48 | 0.47 | 0.45 | 0.28 | 0.38 | 0.40 | 0.44 | 0.50 | 0.30 | 0.40 | 0.38 | 0.44   | 0.42 | 0.47 | 0.36 | 0.40 | 0.46 | 0.41 | 0.50 | 0.49 |
| 17        | 0.38 | 0.42 | 0.43 | 0.37 | 0.44 | 0.42 | 0.46 | 0.39 | 0.33 | 0.35 | 0.35 | 0.38 | 0.44 | 0.43 | 0.38 | 0.42 | 0.00 | 0.33 | 0.40 | 0.45 | 0.34 | 0.49 | 0.43 | 0.46 | 0.47 | 0.35 | 0.33 | 0.19 | 0.24 | 0.25 | 0.35 | 0.28 | 0.38 | 0.39 | 0.47 | 0.47 | 0.33 | 0.35 | 0.34 | 0.38 | 0.39 | 0.36 | 0.22 | 0.35 | 0.42 | 0.48 | 0.44 | 0.41   | 0.30 | 0.30 | 0.48 | 0.46 | 0.42 | 0.45 |      |      |
| 18        | 0.38 | 0.40 | 0.32 | 0.58 | 0.37 | 0.40 | 0.42 | 0.40 | 0.33 | 0.36 | 0.33 | 0.46 | 0.39 | 0.39 | 0.39 | 0.43 | 0.33 | 0.00 | 0.33 | 0.45 | 0.47 | 0.34 | 0.42 | 0.36 | 0.39 | 0.48 | 0.29 | 0.22 | 0.25 | 0.52 | 0.47 | 0.51 | 0.44 | 0.39 | 0.39 | 0.42 | 0.44 | 0.17 | 0.31 | 0.42 | 0.36 | 0.46 | 0.29 | 0.33 | 0.44 | 0.29 | 0.38 | 0.41   | 0.53 | 0.39 | 0.38 | 0.44 | 0.40 | 0.36 |      |      |
| 19        | 0.39 | 0.49 | 0.38 | 0.40 | 0.60 | 0.51 | 0.47 | 0.49 | 0.45 | 0.46 | 0.45 | 0.40 | 0.48 | 0.49 | 0.46 | 0.45 | 0.40 | 0.33 | 0.00 | 0.41 | 0.49 | 0.46 | 0.47 | 0.49 | 0.47 | 0.42 | 0.36 | 0.21 | 0.23 | 0.42 | 0.47 | 0.44 | 0.47 | 0.40 | 0.45 | 0.45 | 0.43 | 0.28 | 0.37 | 0.45 | 0.36 | 0.46 | 0.24 | 0.36 | 0.43 | 0.46 | 0.51 | 0.46   | 0.46 | 0.41 | 0.48 | 0.51 | 0.49 | 0.44 |      |      |
| 20        | 0.38 | 0.50 | 0.36 | 0.47 | 0.51 | 0.63 | 0.54 | 0.50 | 0.39 | 0.41 | 0.40 | 0.45 | 0.55 | 0.51 | 0.47 | 0.44 | 0.45 | 0.45 | 0.41 | 0.00 | 0.58 | 0.44 | 0.54 | 0.52 | 0.53 | 0.47 | 0.35 | 0.24 | 0.25 | 0.52 | 0.49 | 0.51 | 0.47 | 0.41 | 0.49 | 0.55 | 0.49 | 0.23 | 0.37 | 0.48 | 0.40 | 0.49 | 0.23 | 0.41 | 0.41 | 0.40 | 0.42 | 0.52   | 0.49 | 0.42 | 0.54 | 0.44 | 0.52 | 0.50 |      |      |
| 21        | 0.40 | 0.42 | 0.29 | 0.44 | 0.51 | 0.59 | 0.46 | 0.46 | 0.34 | 0.38 | 0.32 | 0.46 | 0.46 | 0.41 | 0.49 | 0.51 | 0.34 | 0.47 | 0.49 | 0.58 | 0.00 | 0.36 | 0.64 | 0.45 | 0.57 | 0.43 | 0.34 | 0.25 | 0.28 | 0.64 | 0.49 | 0.60 | 0.46 | 0.43 | 0.49 | 0.52 | 0.43 | 0.18 | 0.40 | 0.37 | 0.49 | 0.61 | 0.31 | 0.51 | 0.29 | 0.33 | 0.38 | 0.62   | 0.50 | 0.50 | 0.51 | 0.41 | 0.44 | 0.44 | 0.56 |      |
| 22        | 0.39 | 0.52 | 0.48 | 0.43 | 0.46 | 0.47 | 0.56 | 0.48 | 0.39 | 0.44 | 0.46 | 0.47 | 0.51 | 0.53 | 0.33 | 0.46 | 0.49 | 0.34 | 0.46 | 0.44 | 0.36 | 0.00 | 0.41 | 0.54 | 0.51 | 0.42 | 0.28 | 0.20 | 0.24 | 0.36 | 0.44 | 0.40 | 0.42 | 0.35 | 0.50 | 0.51 | 0.42 | 0.32 | 0.31 | 0.47 | 0.32 | 0.46 | 0.23 | 0.31 | 0.50 | 0.46 | 0.60 | 0.45   | 0.33 | 0.31 | 0.53 | 0.46 | 0.54 | 0.51 |      |      |
| 23        | 0.40 | 0.48 | 0.33 | 0.44 | 0.48 | 0.52 | 0.46 | 0.48 | 0.37 | 0.37 | 0.38 | 0.49 | 0.48 | 0.48 | 0.42 | 0.47 | 0.43 | 0.42 | 0.47 | 0.54 | 0.64 | 0.41 | 0.00 | 0.51 | 0.54 | 0.45 | 0.33 | 0.26 | 0.30 | 0.48 | 0.47 | 0.47 | 0.45 | 0.40 | 0.54 | 0.51 | 0.46 | 0.25 | 0.33 | 0.45 | 0.42 | 0.52 | 0.25 | 0.37 | 0.36 | 0.42 | 0.46 | 0.55   | 0.40 | 0.39 | 0.55 | 0.42 | 0.45 | 0.50 |      |      |
| 24        | 0.49 | 0.64 | 0.47 | 0.46 | 0.56 | 0.55 | 0.63 | 0.65 | 0.49 | 0.51 | 0.48 | 0.41 | 0.66 | 0.65 | 0.48 | 0.44 | 0.46 | 0.36 | 0.49 | 0.52 | 0.45 | 0.54 | 0.51 | 0.00 | 0.75 | 0.47 | 0.33 | 0.24 | 0.22 | 0.44 | 0.56 | 0.48 | 0.51 | 0.43 | 0.58 | 0.60 | 0.58 | 0.31 | 0.35 | 0.51 | 0.38 | 0.53 | 0.29 | 0.33 | 0.40 | 0.57 | 0.63 | 0.61</ |      |      |      |      |      |      |      |      |



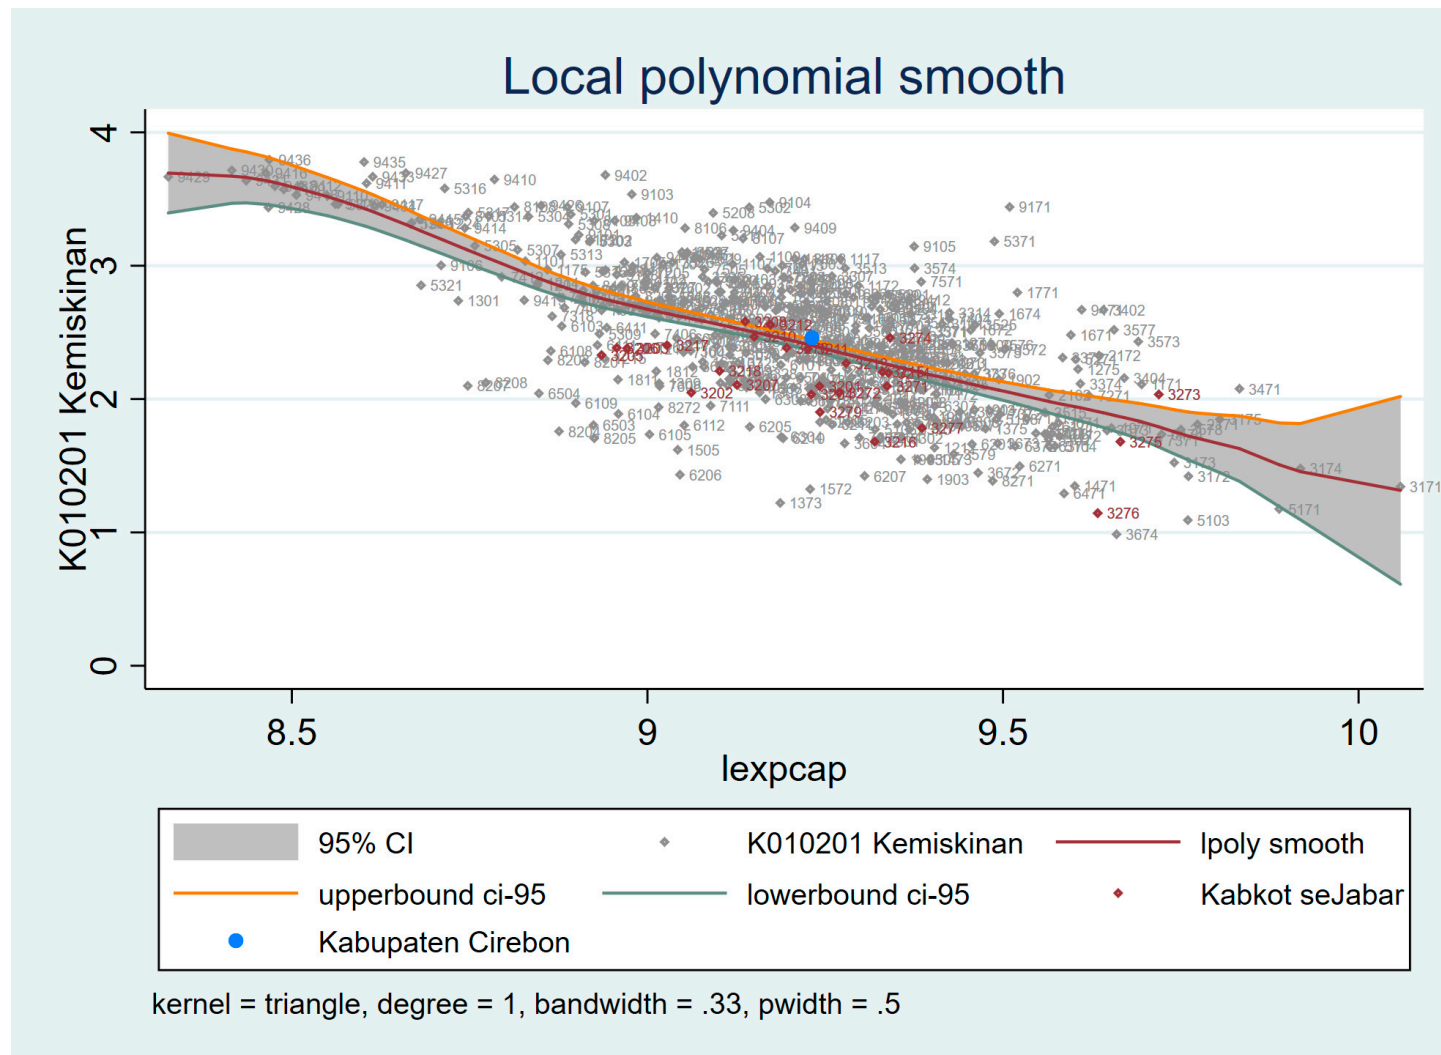

**Figure S1. Performance of Poverty on per capita income**

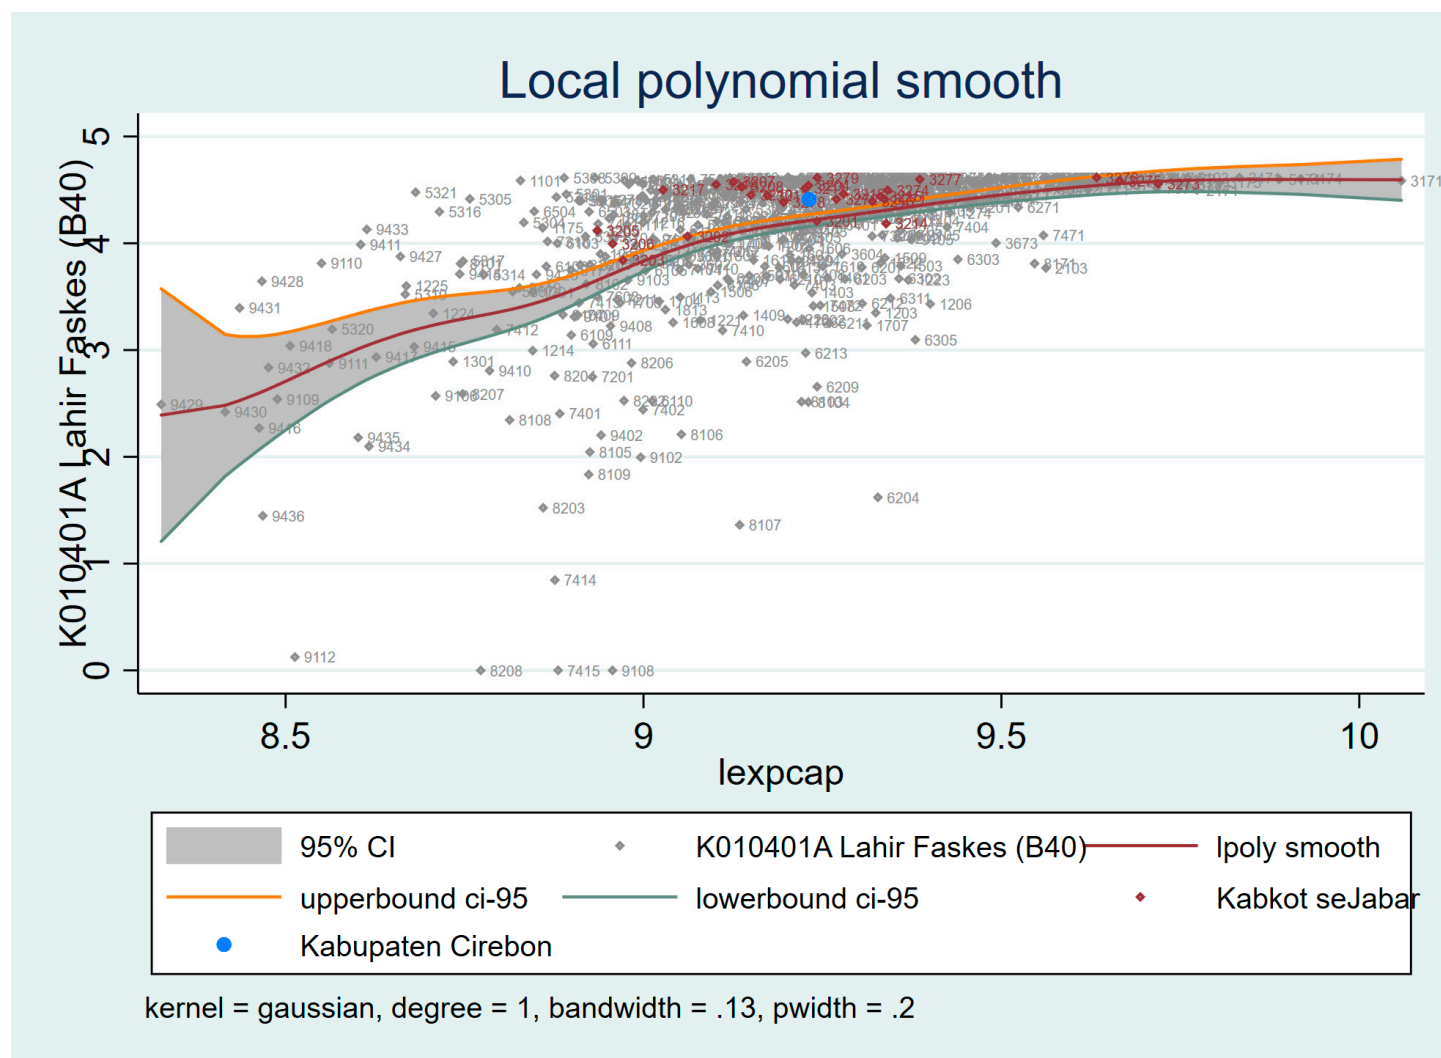

**Figure S2. Performance of Birth in Health Facility (B40) on per capita income**

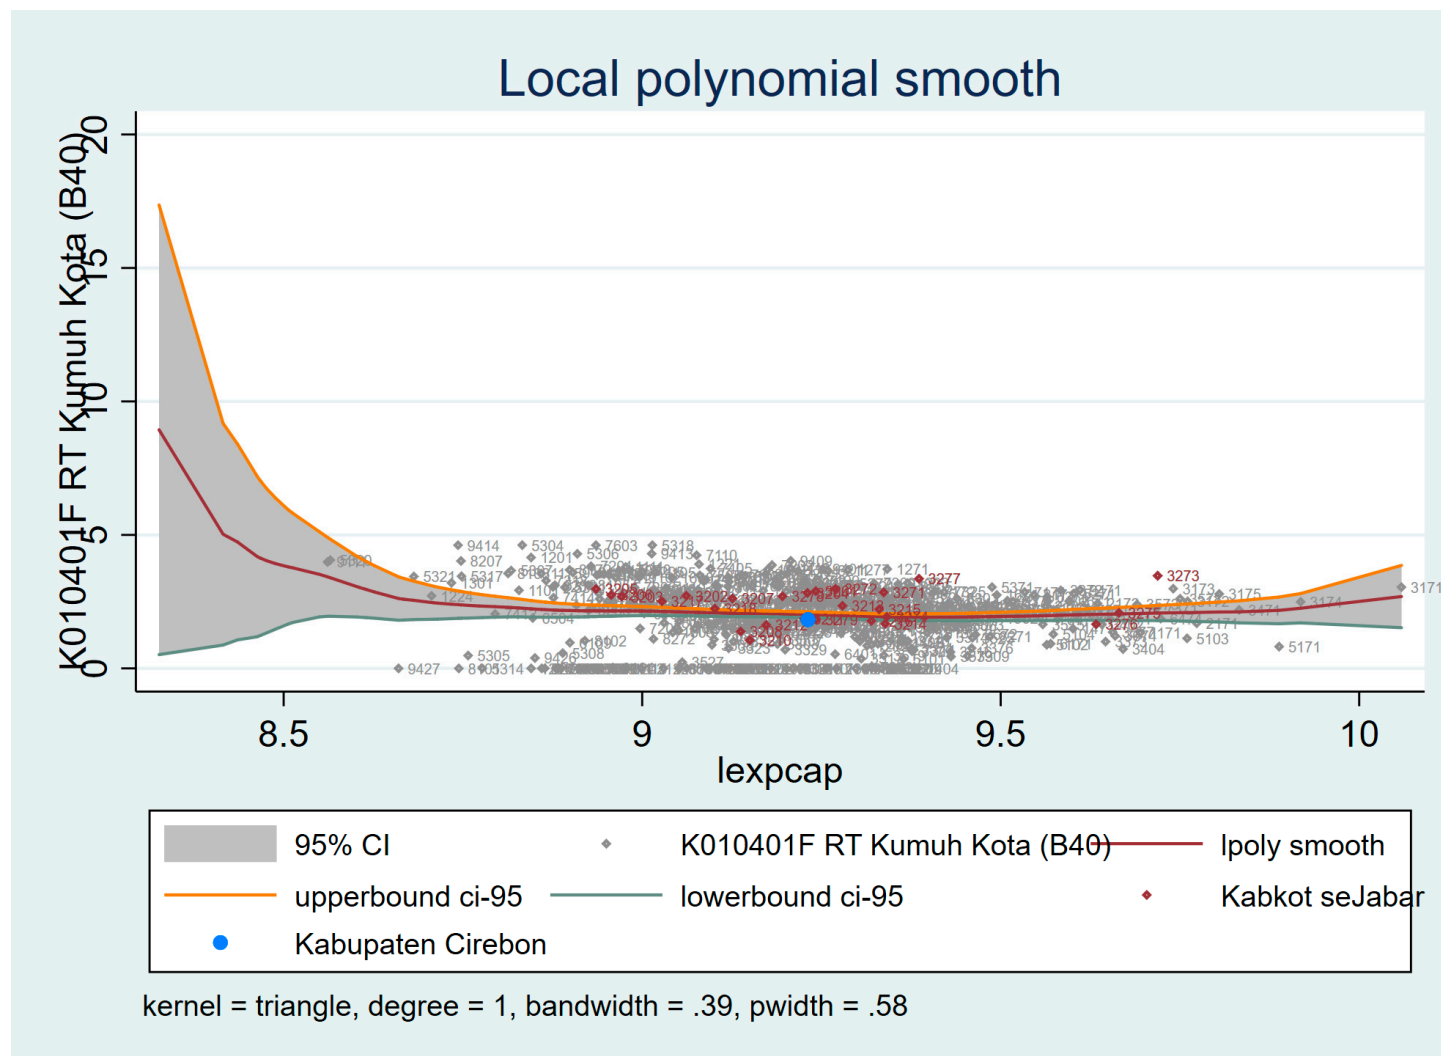

**Figure S3. Performance of Urban Slum Households (B40) on per capita income**

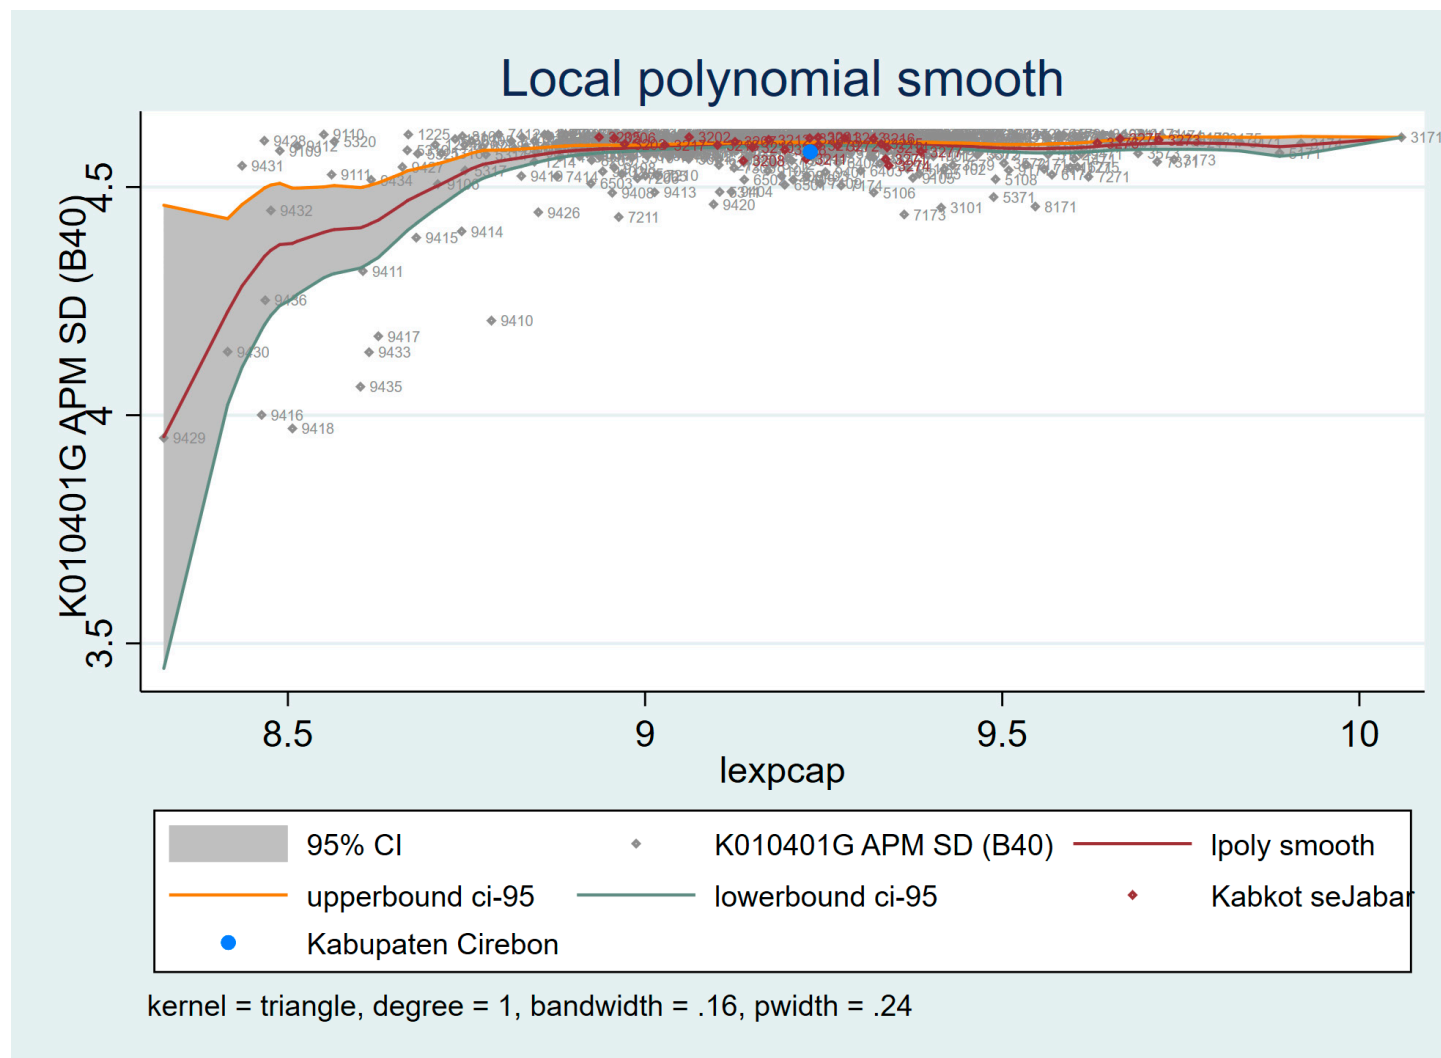

**Figure S4. Performance of Net Enrollment Rate Primary School (B40) on per capita income**



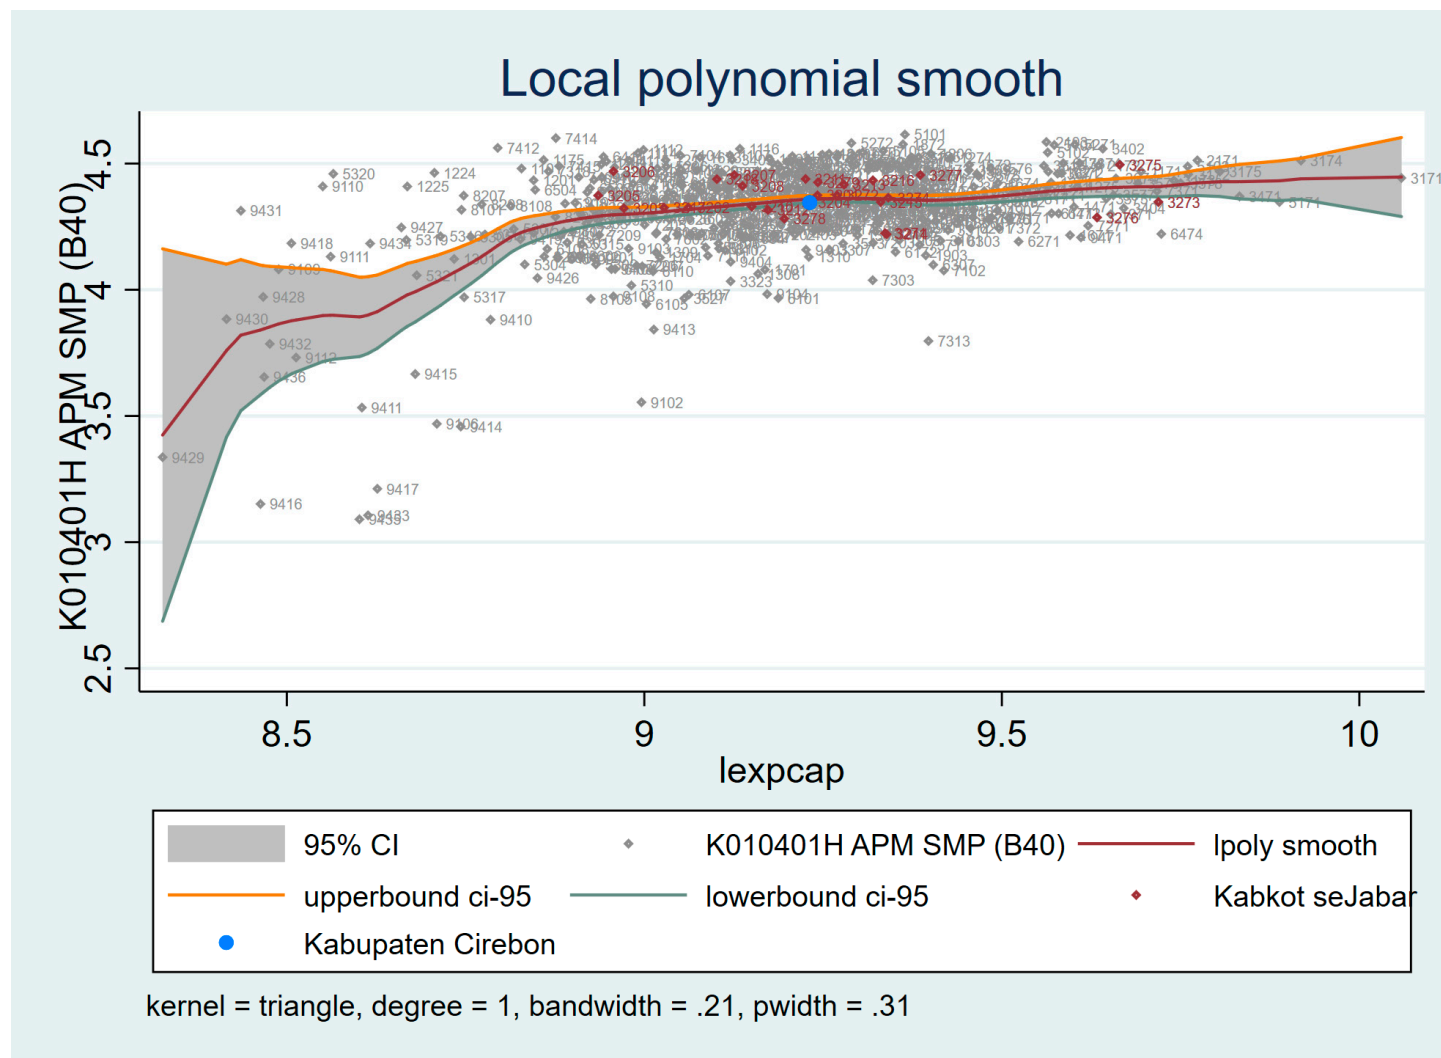

**Figure S5. Performance of Net Enrollment Rate Lower-secondary School (B40) on per capita income**

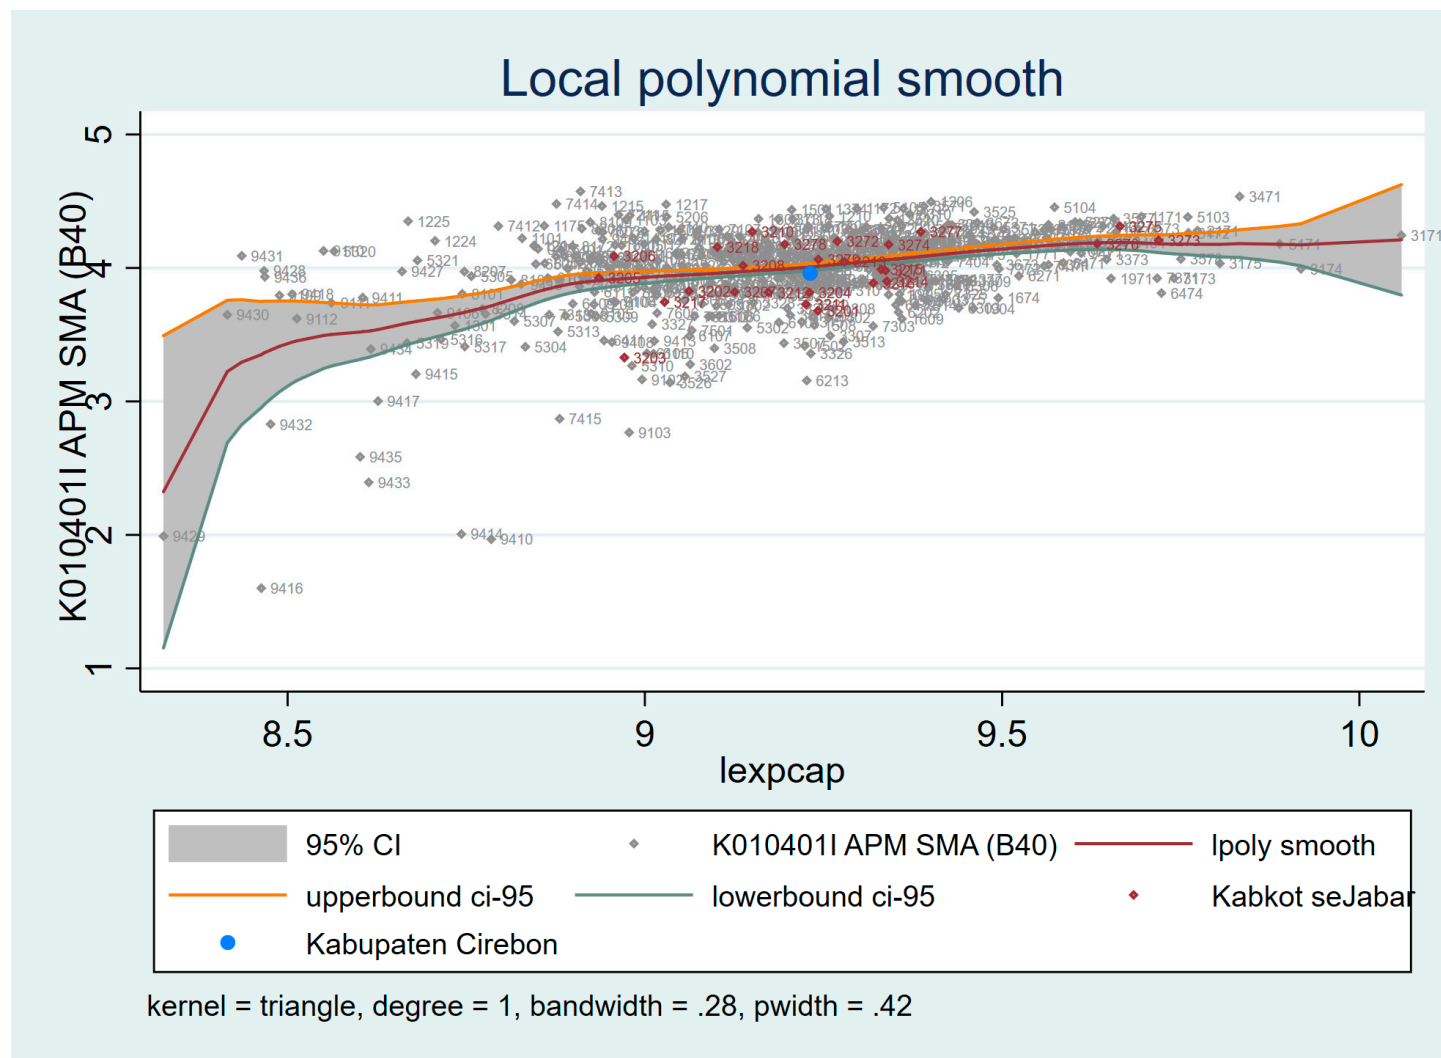

**Figure S6. Performance of Net Enrollment Rate Upper-secondary School (B40) on per capita income**

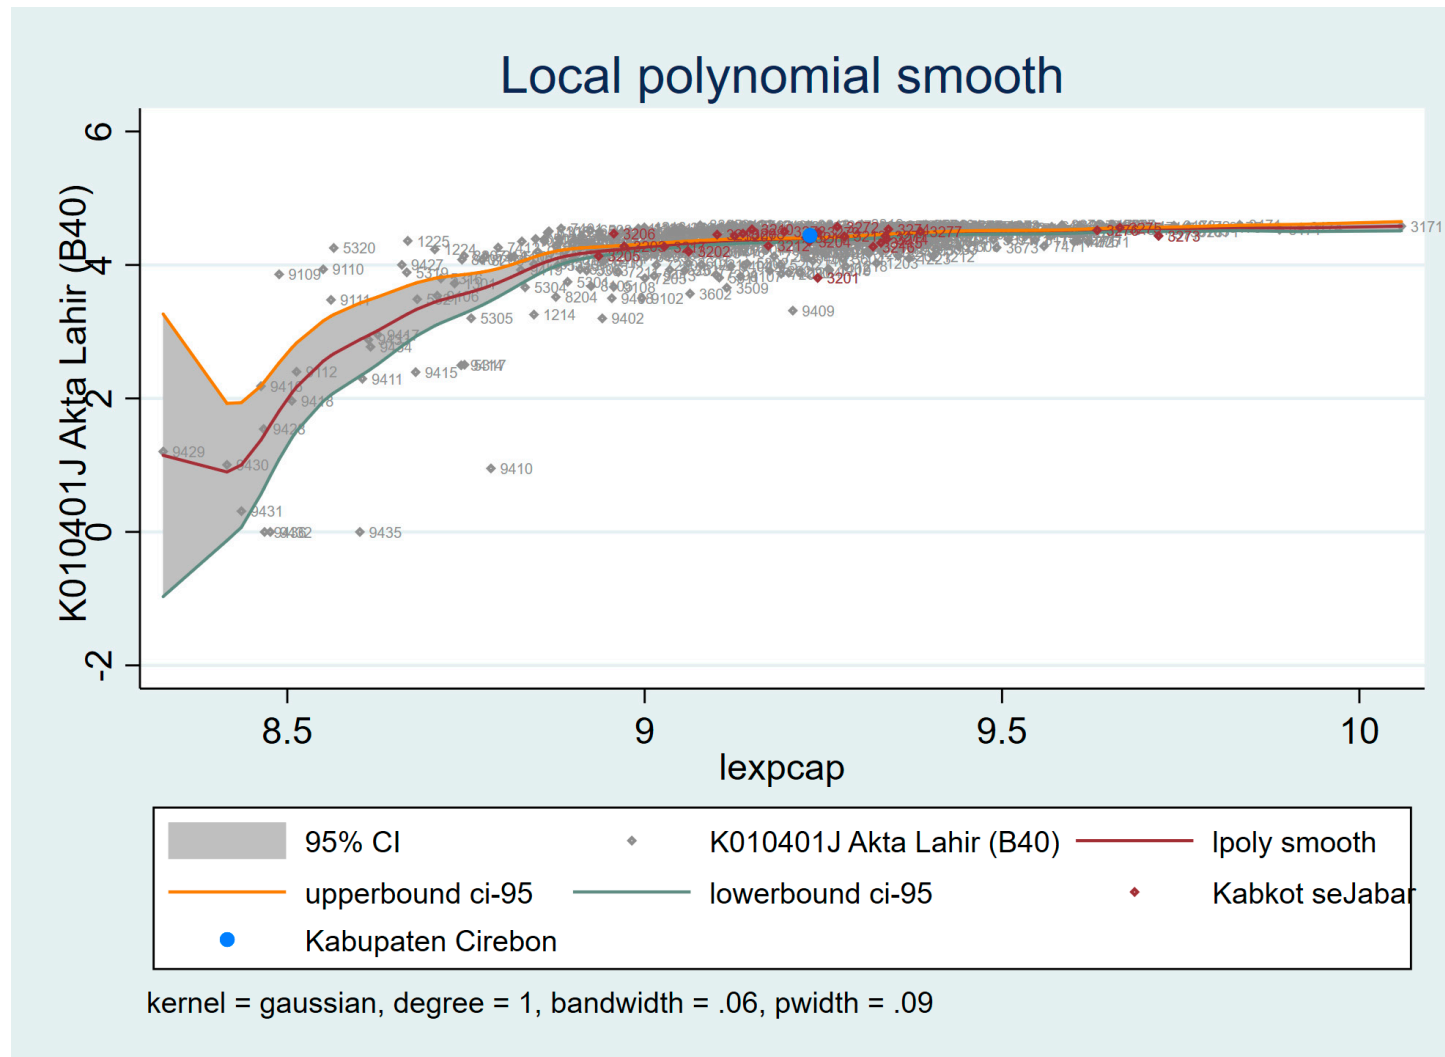

**Figure S7. Performance of Birth Certificate (B40) on per capita income**

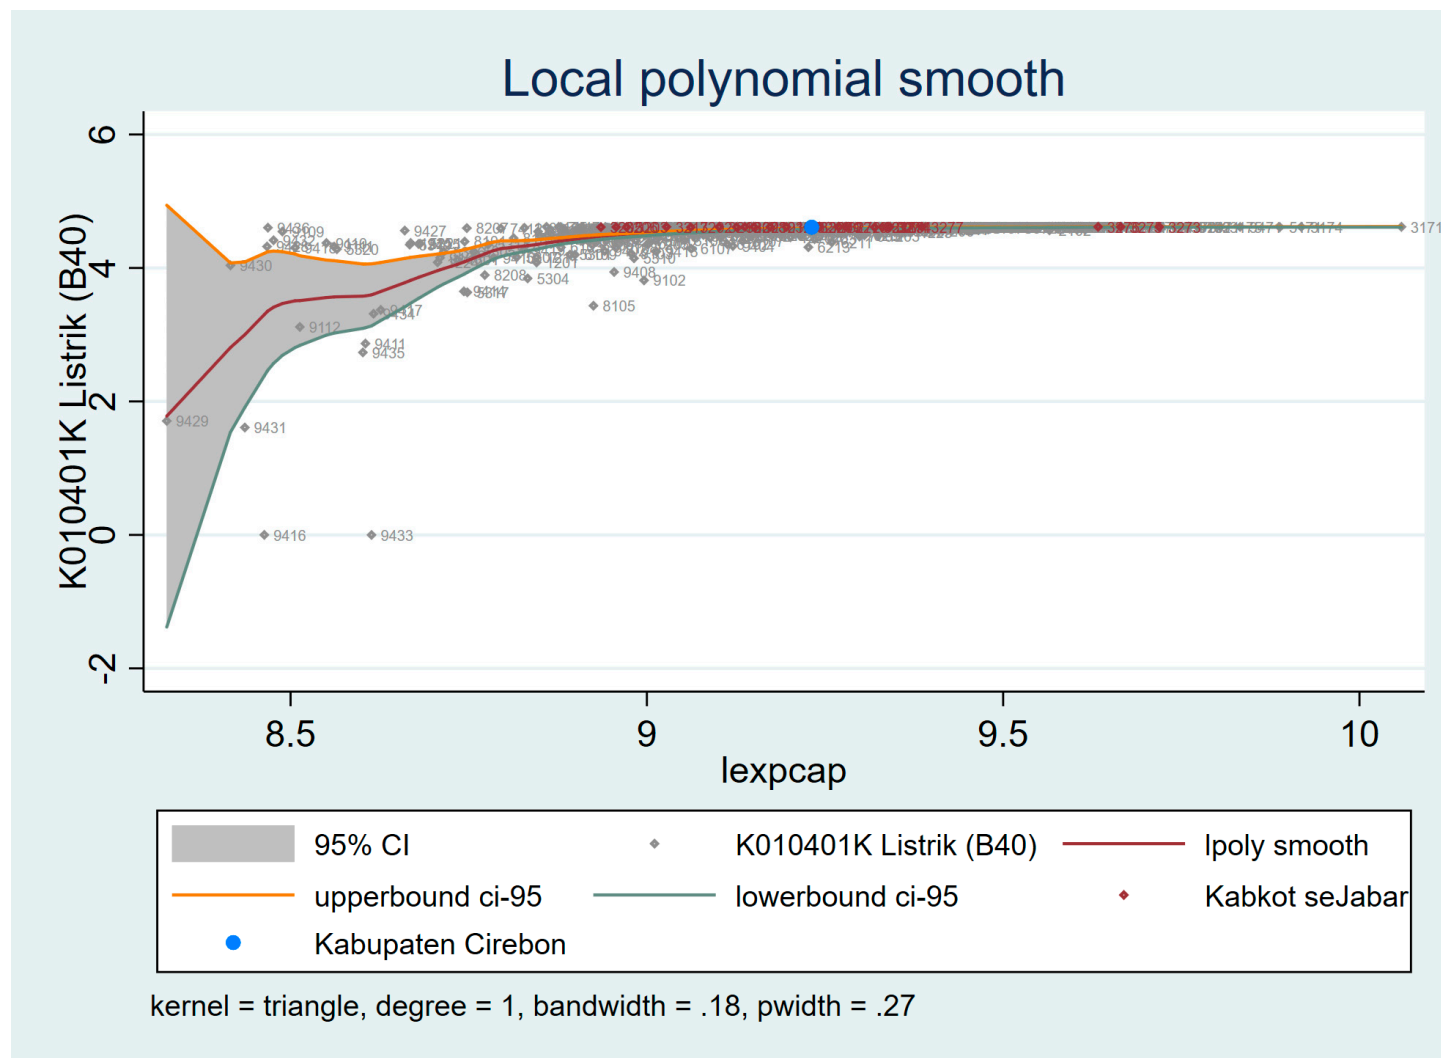

**Figure S8. Performance of Electricity (B40) on per capita income**



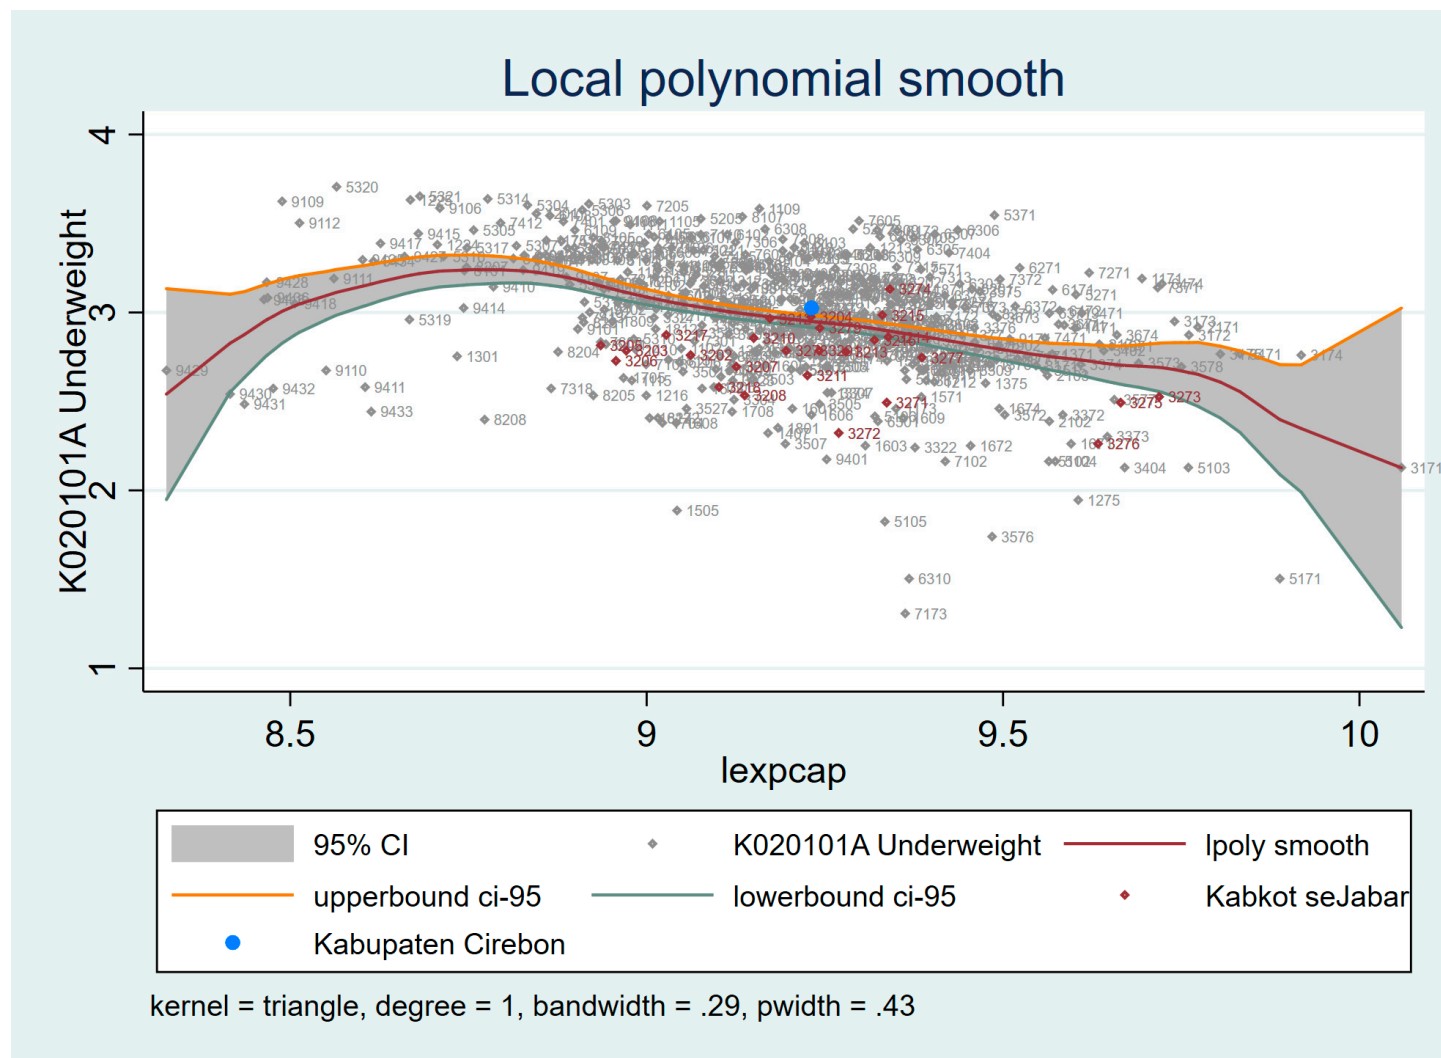

**Figure S9. Performance of Underweight on per capita income**

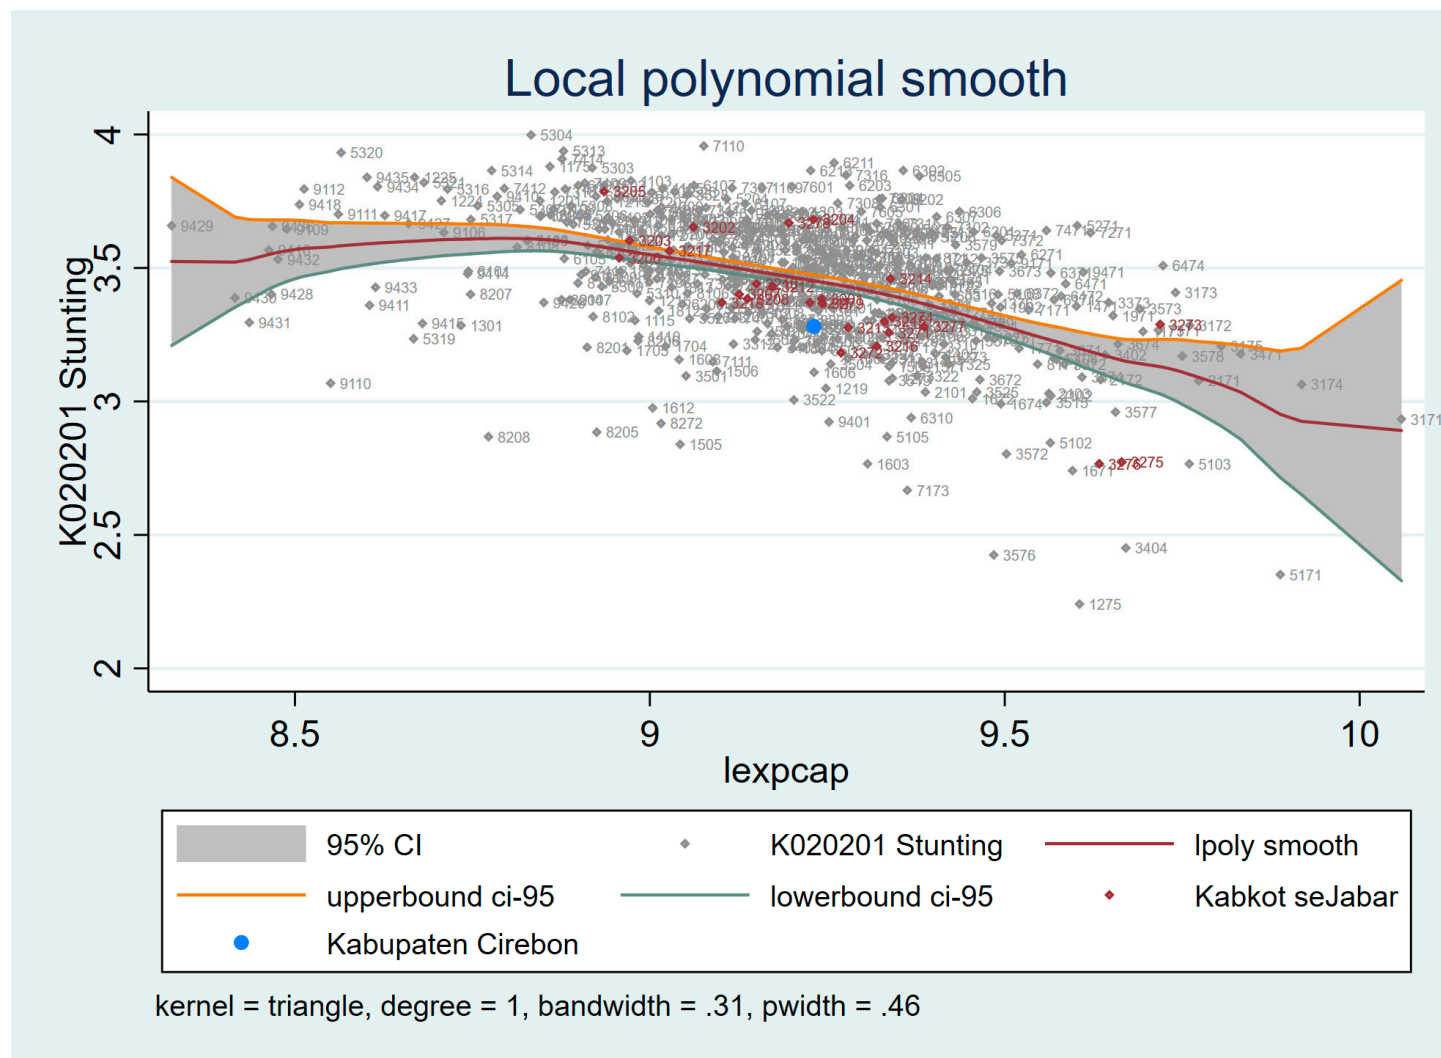

**Figure S10. Performance of Stunting on per capita income**

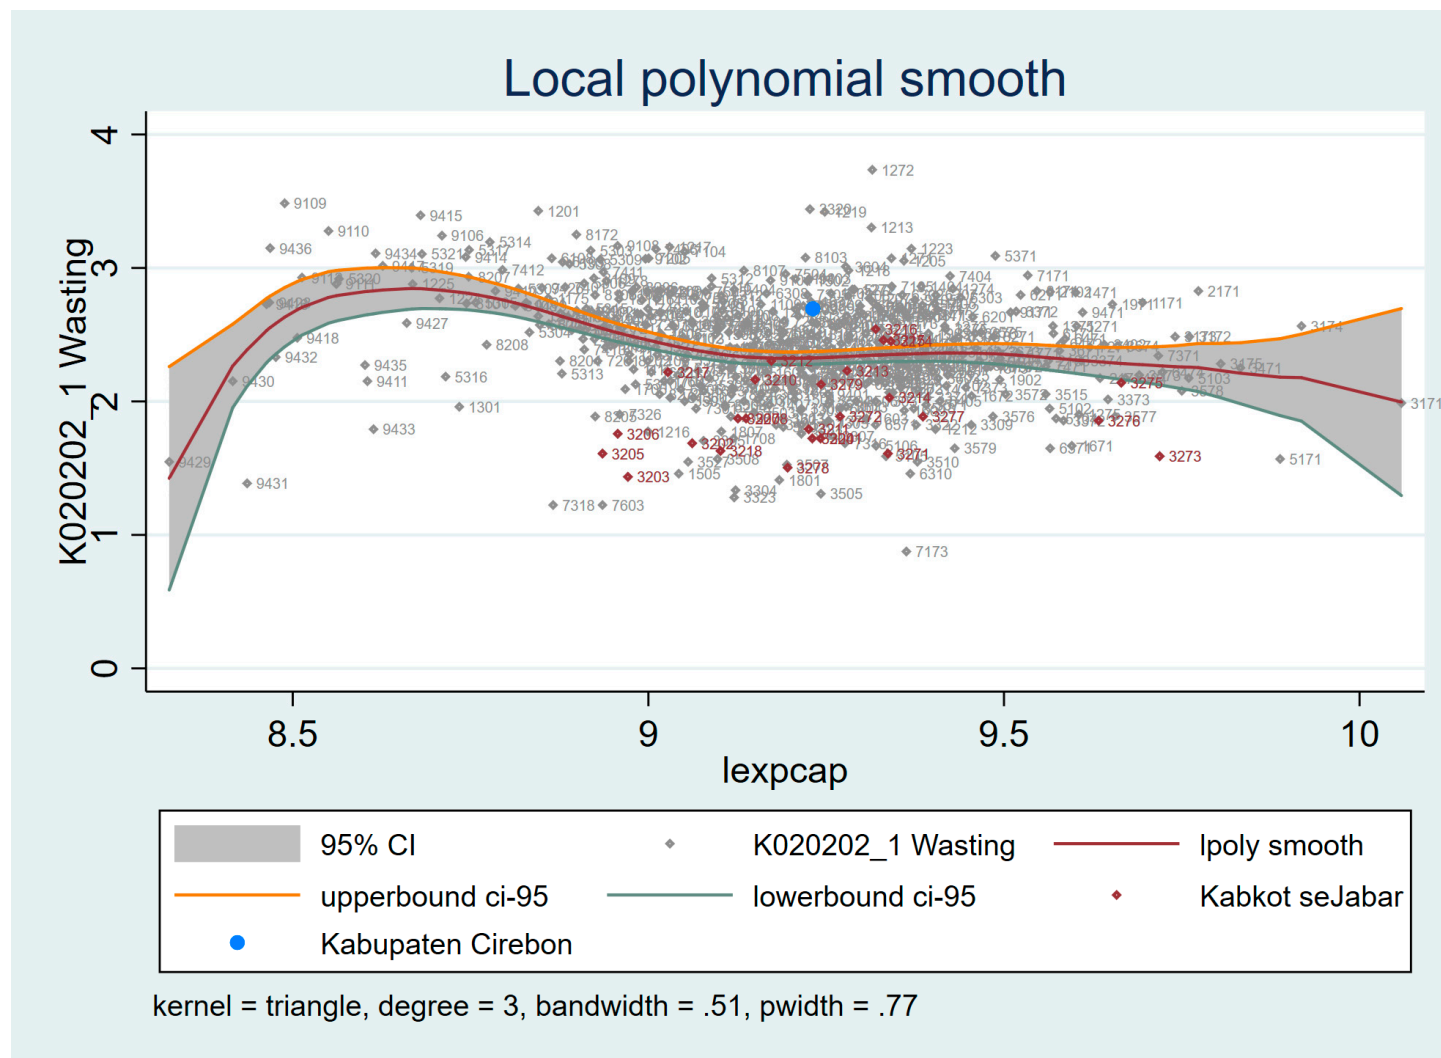

**Figure S11. Performance of Wasting on per capita income**

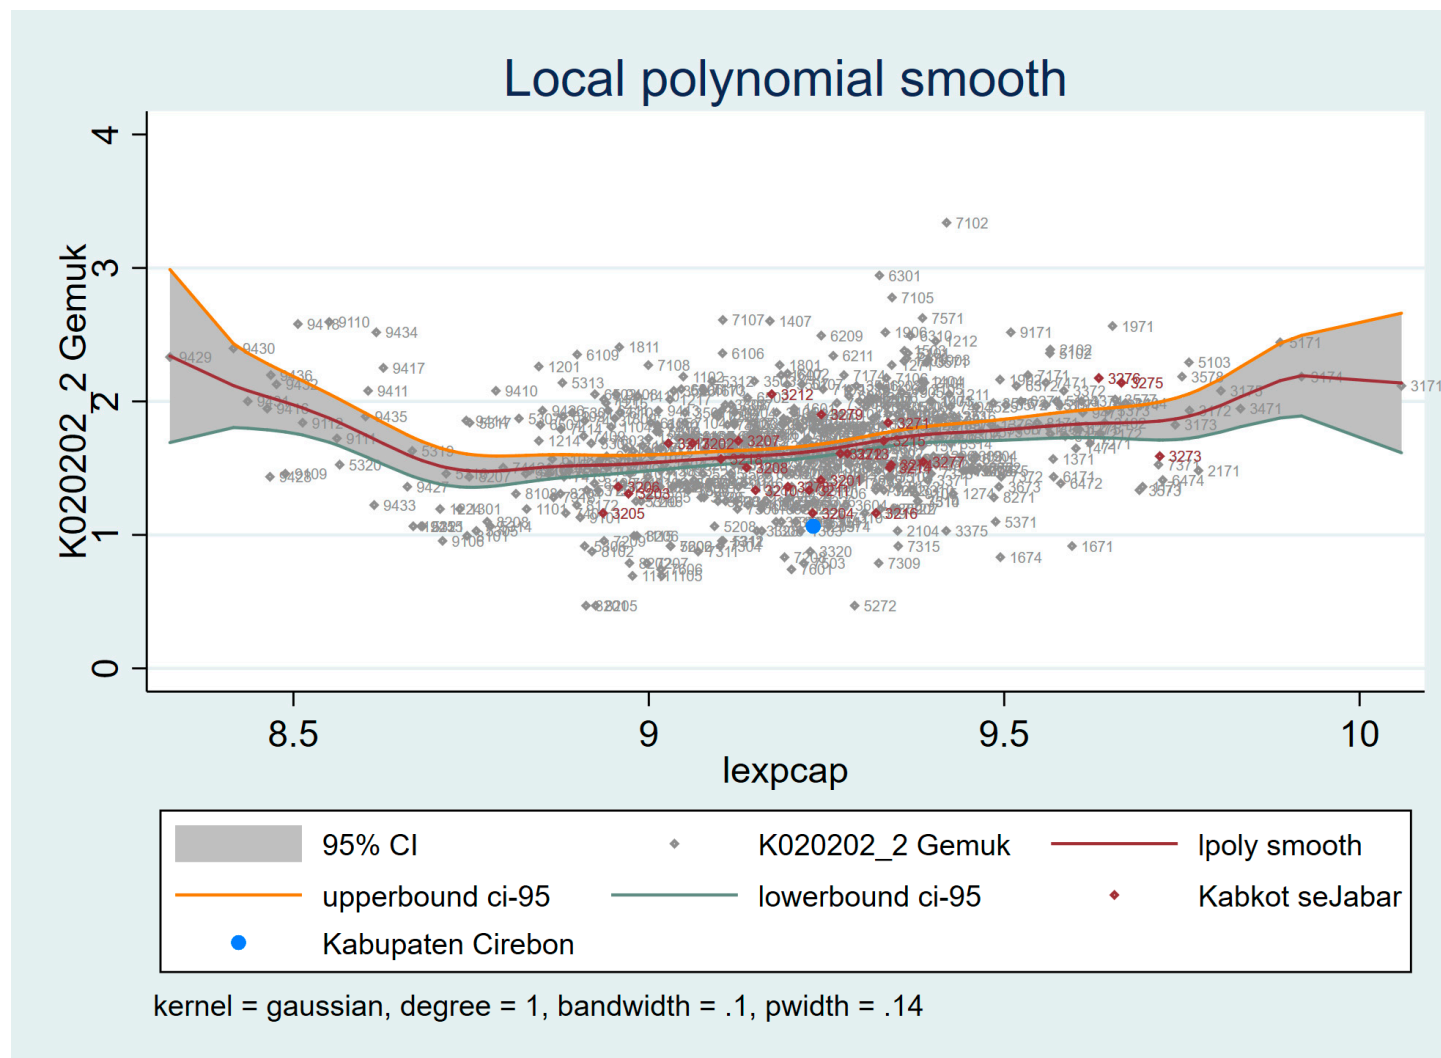

**Figure S12. Performance of Overweight on per capita income**



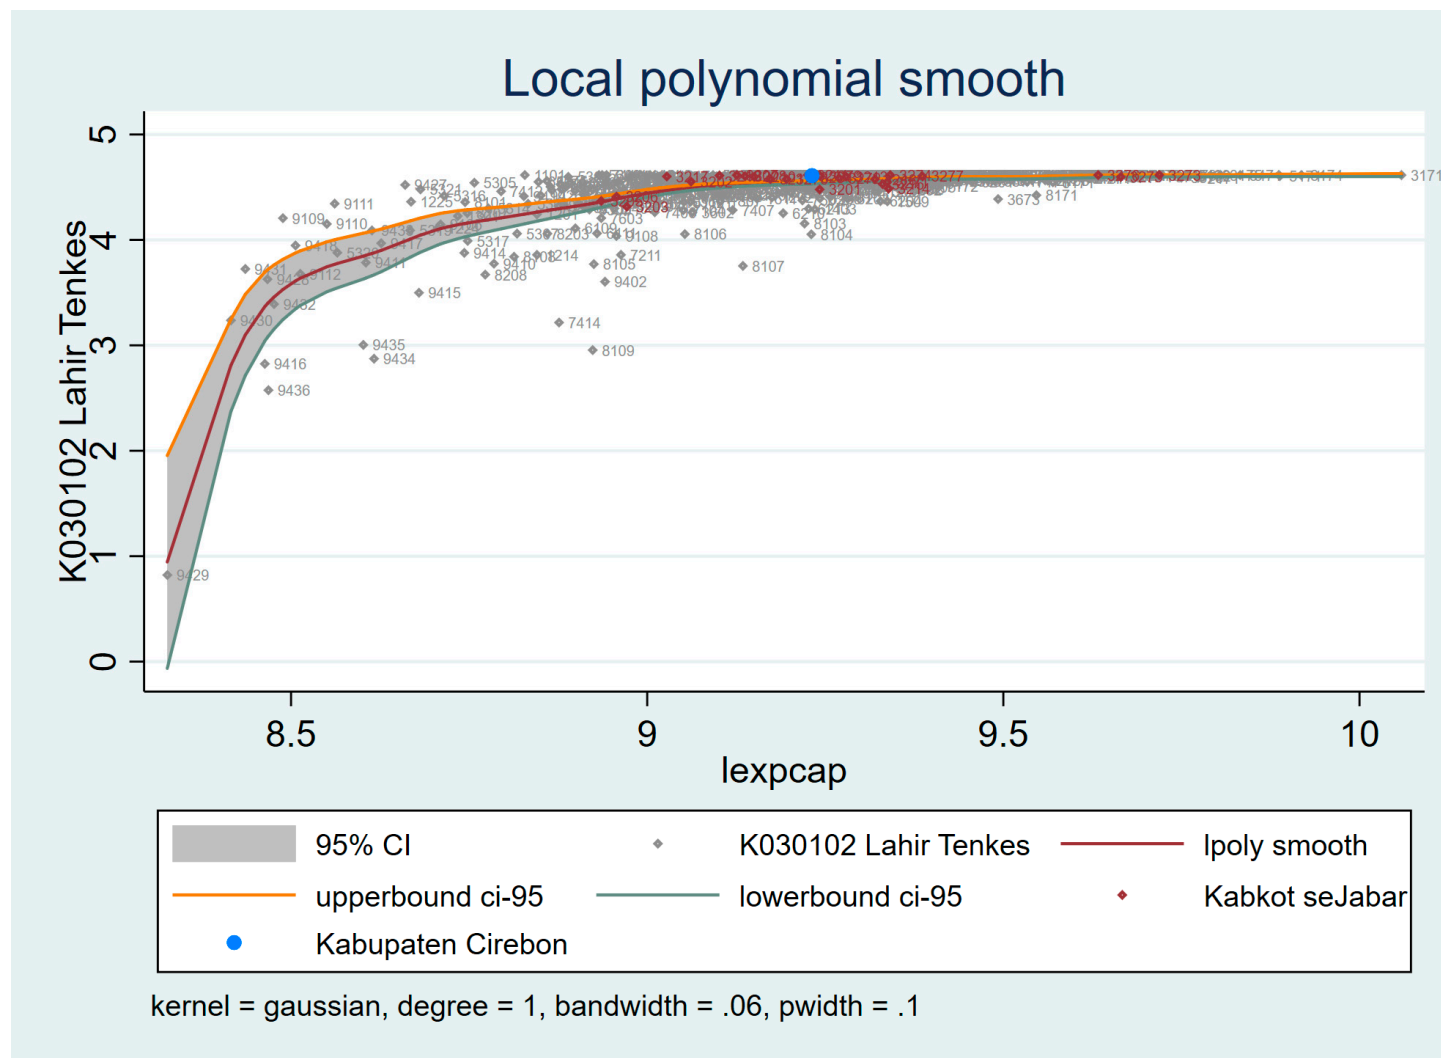

**Figure S13. Performance of Birth Attended by Skilled Health Personnel on per capita income**

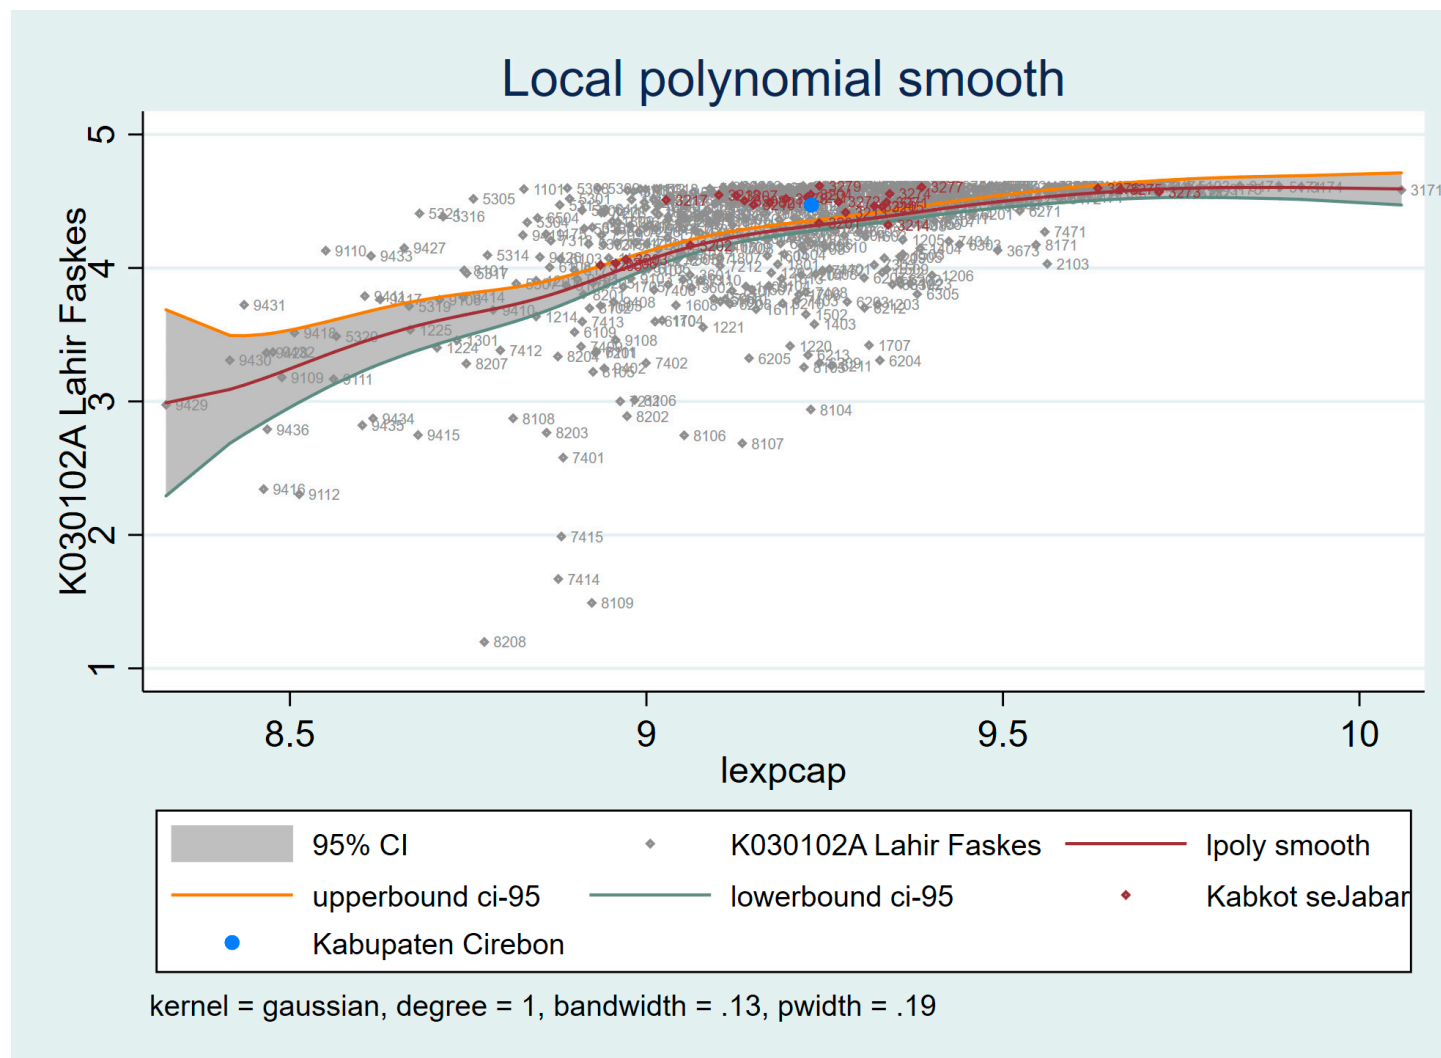

**Figure S14. Performance of Birth at Health Facility on per capita income**

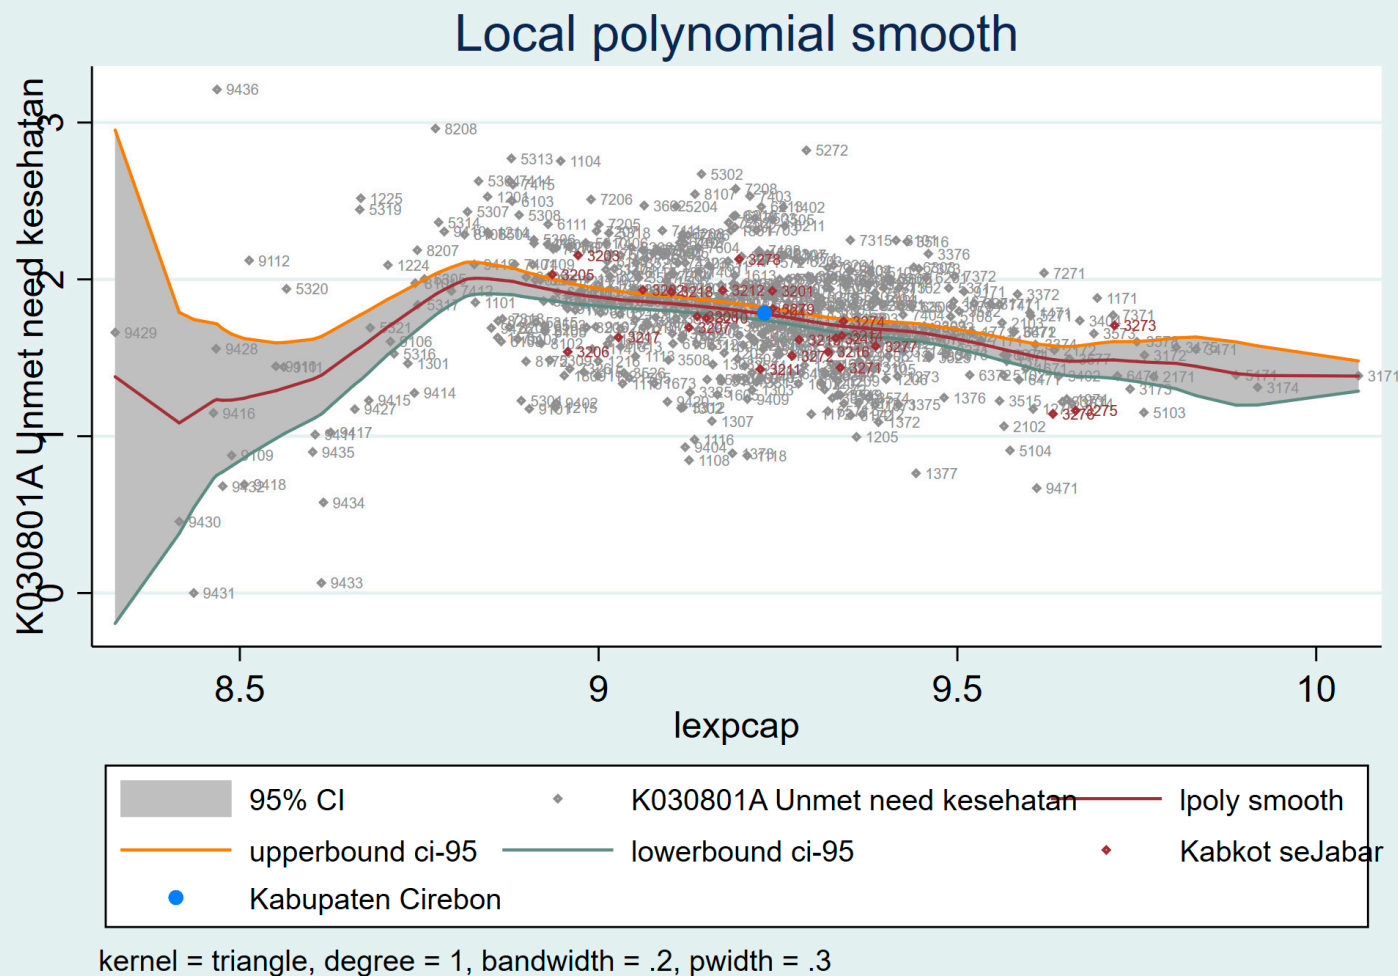

**Figure S15. Performance of Unmet Need in Health Services on per capita income**

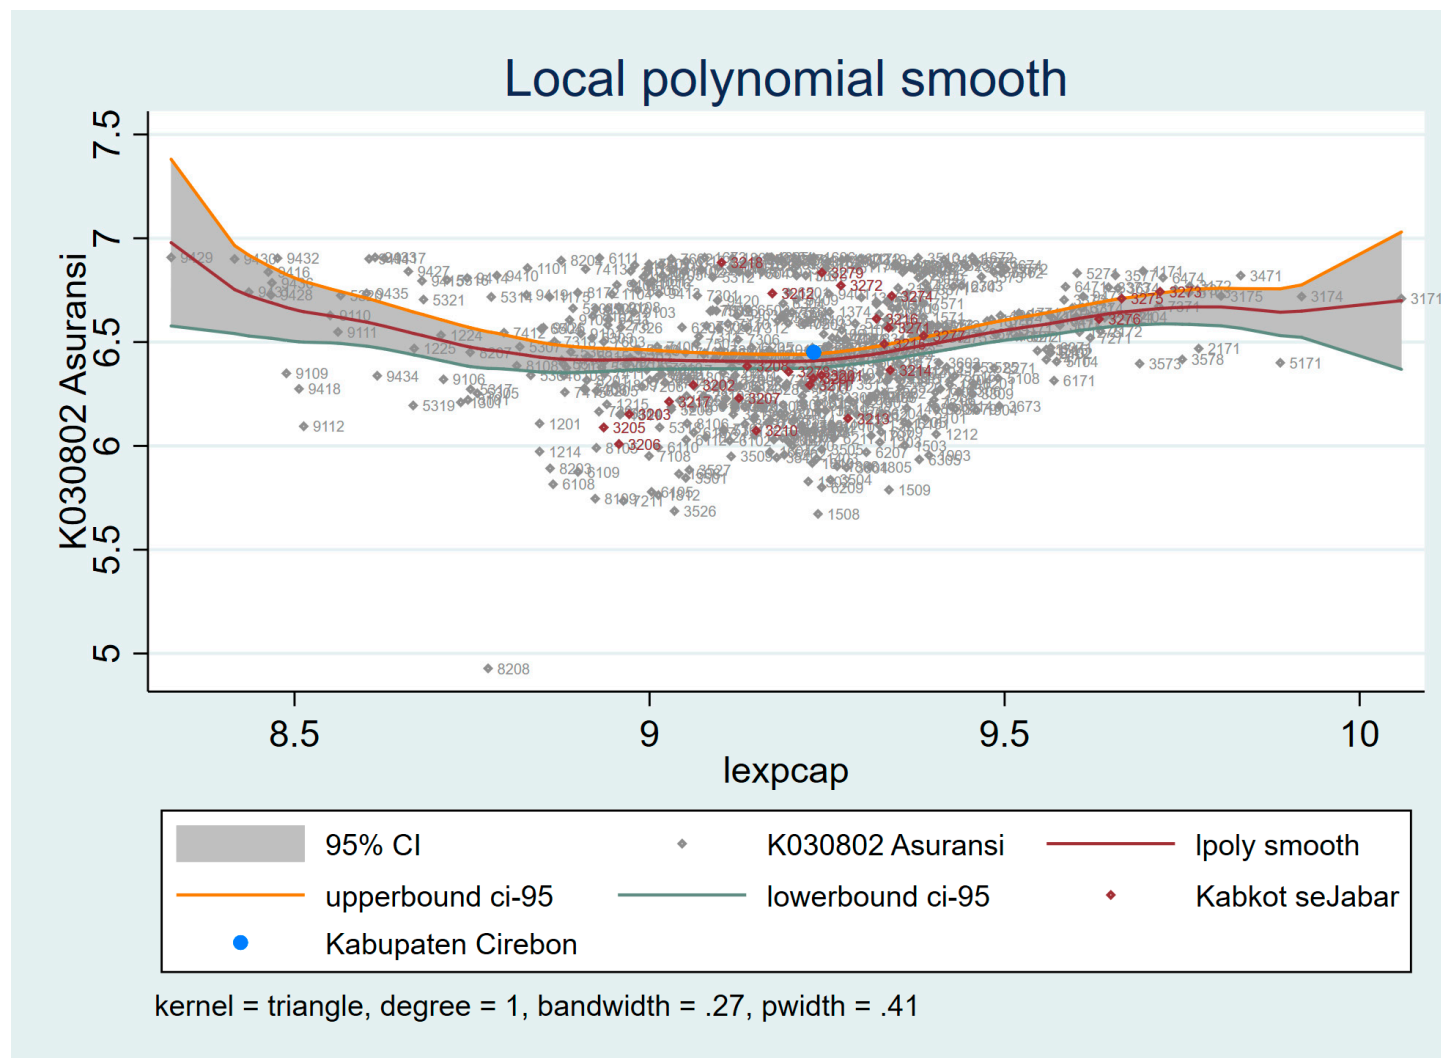

**Figure S16. Performance of Health Insurance on per capita income**

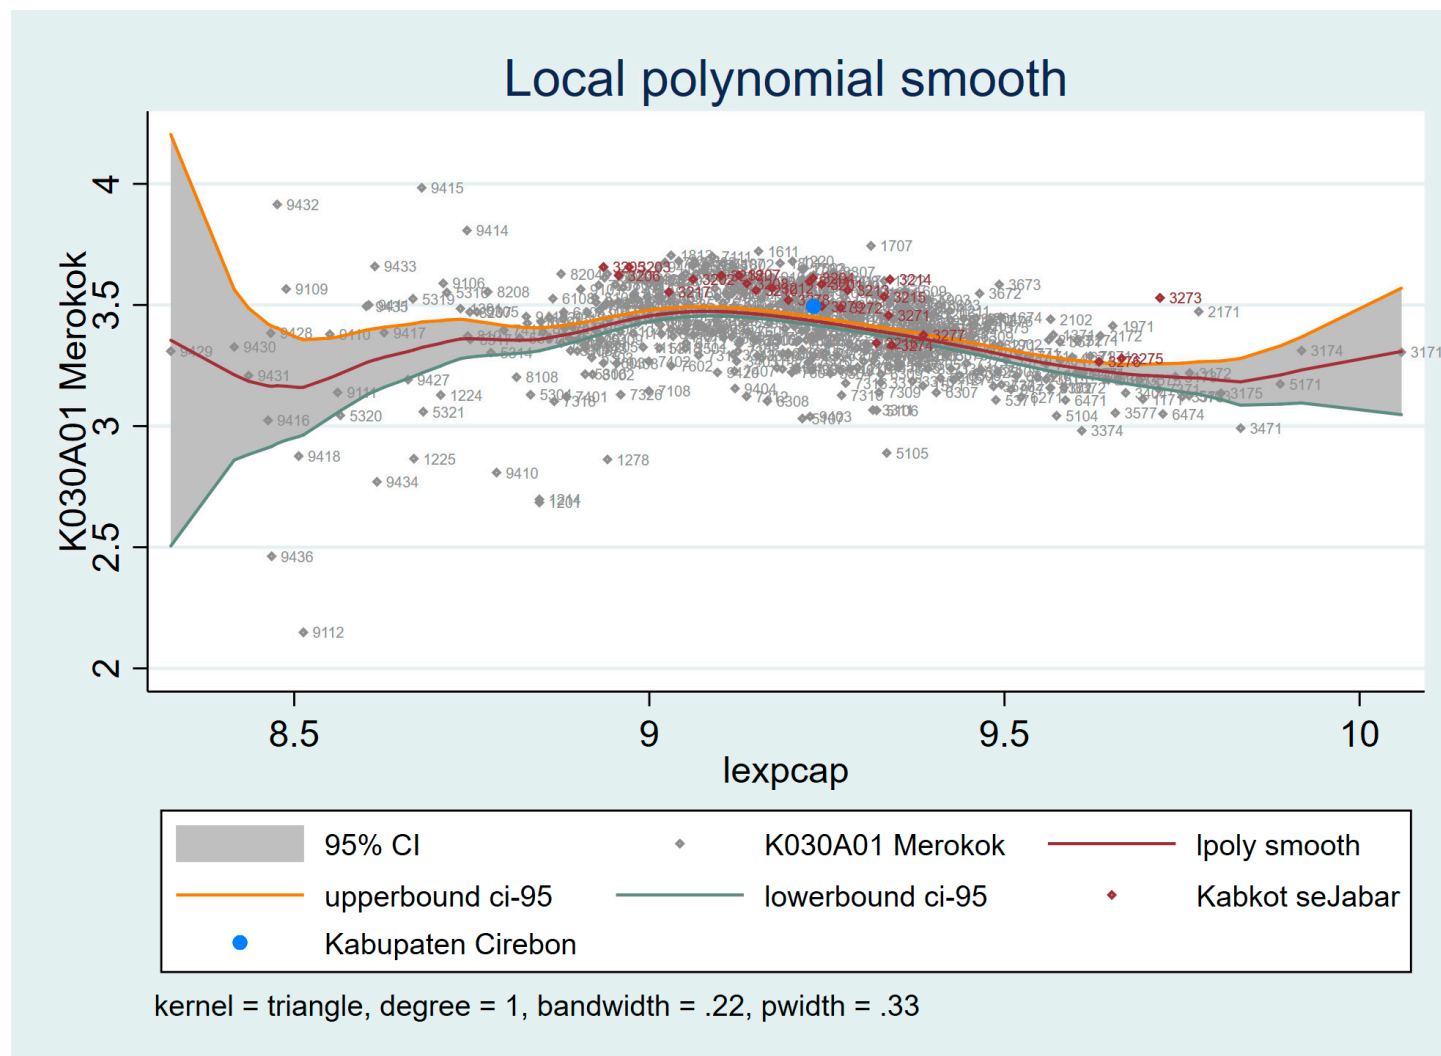

**Figure S17. Performance of Smoking on per capita income**

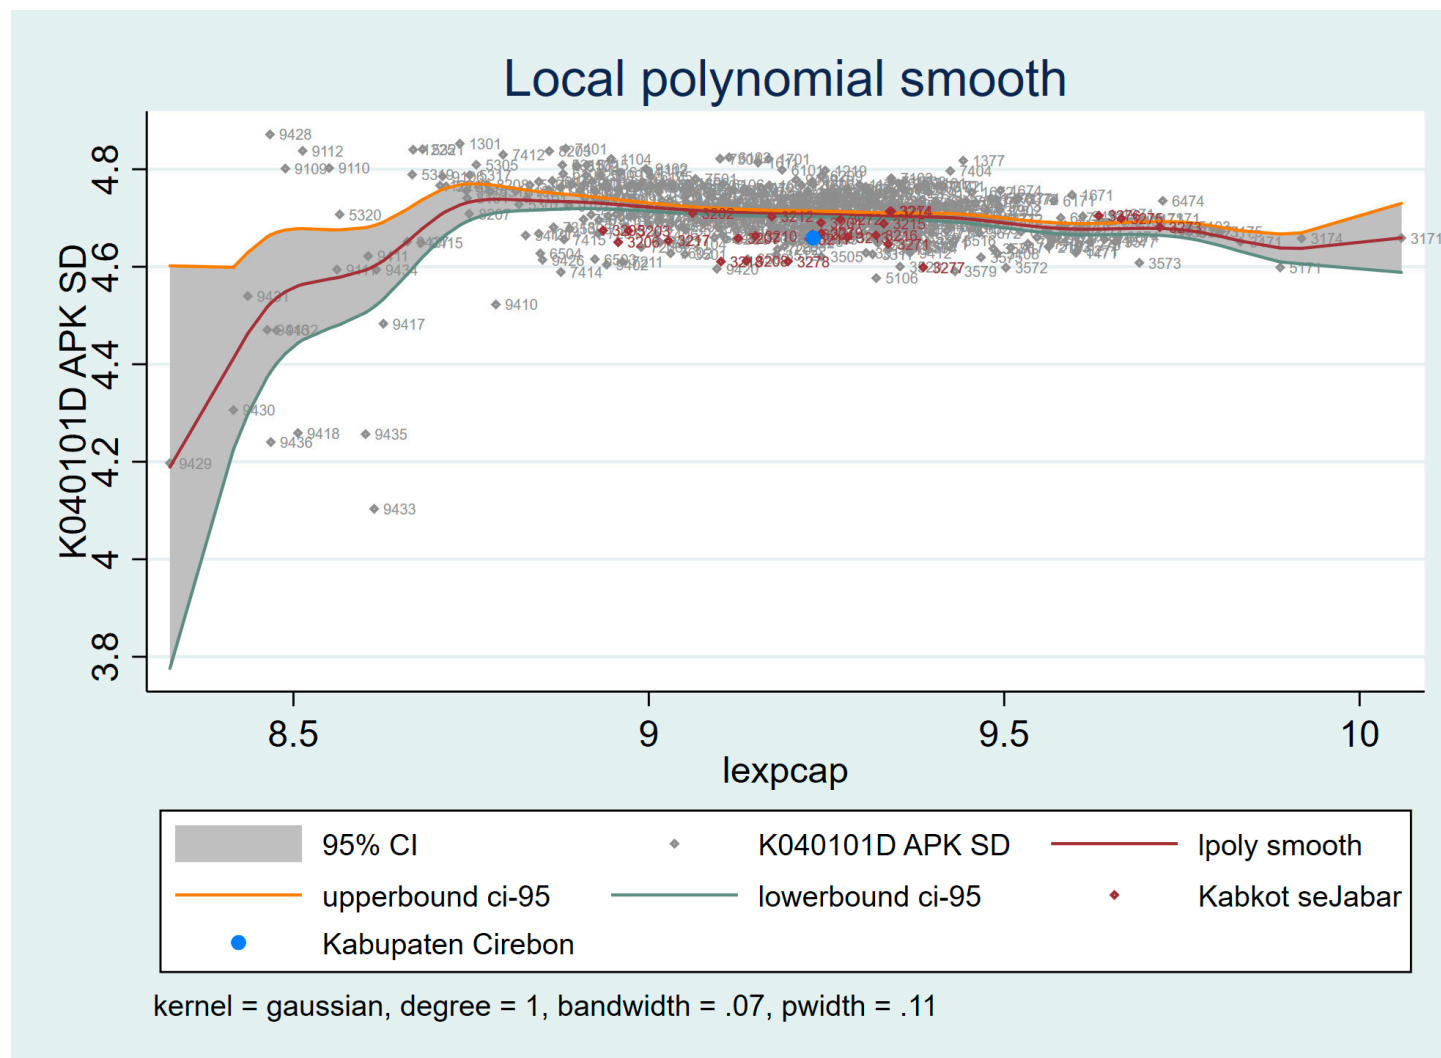

**Figure S18. Performance of Gross Enrollment Rate of Primary School on per capita income**



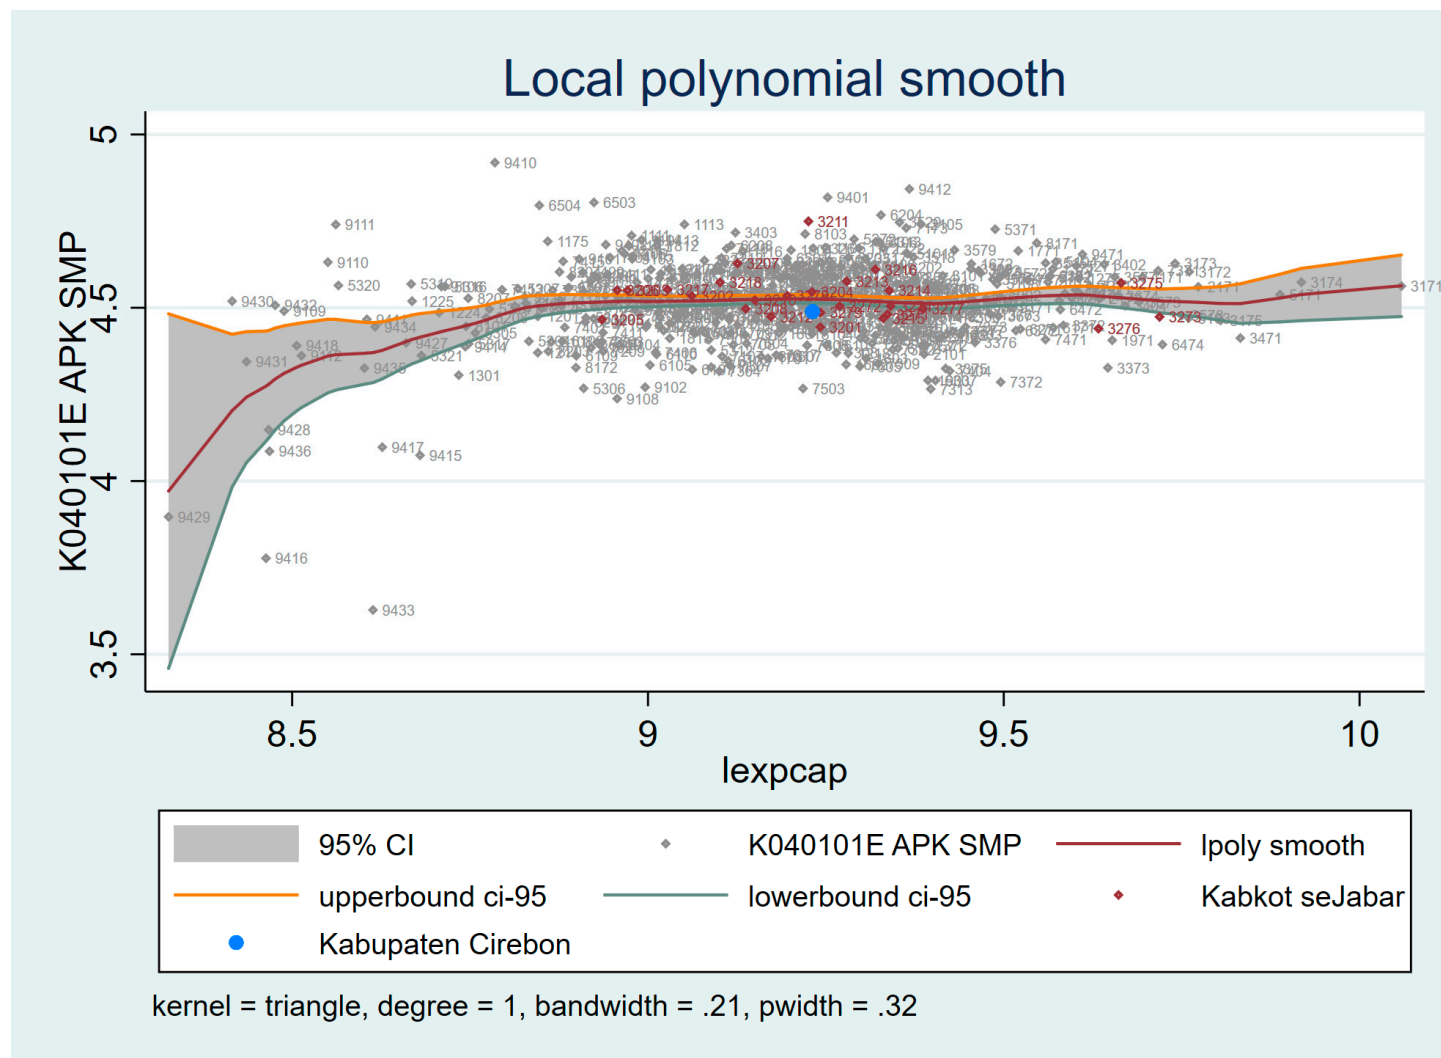

**Figure S19. Performance of Gross Enrollment Rate of Lower-secondary School on per capita income**

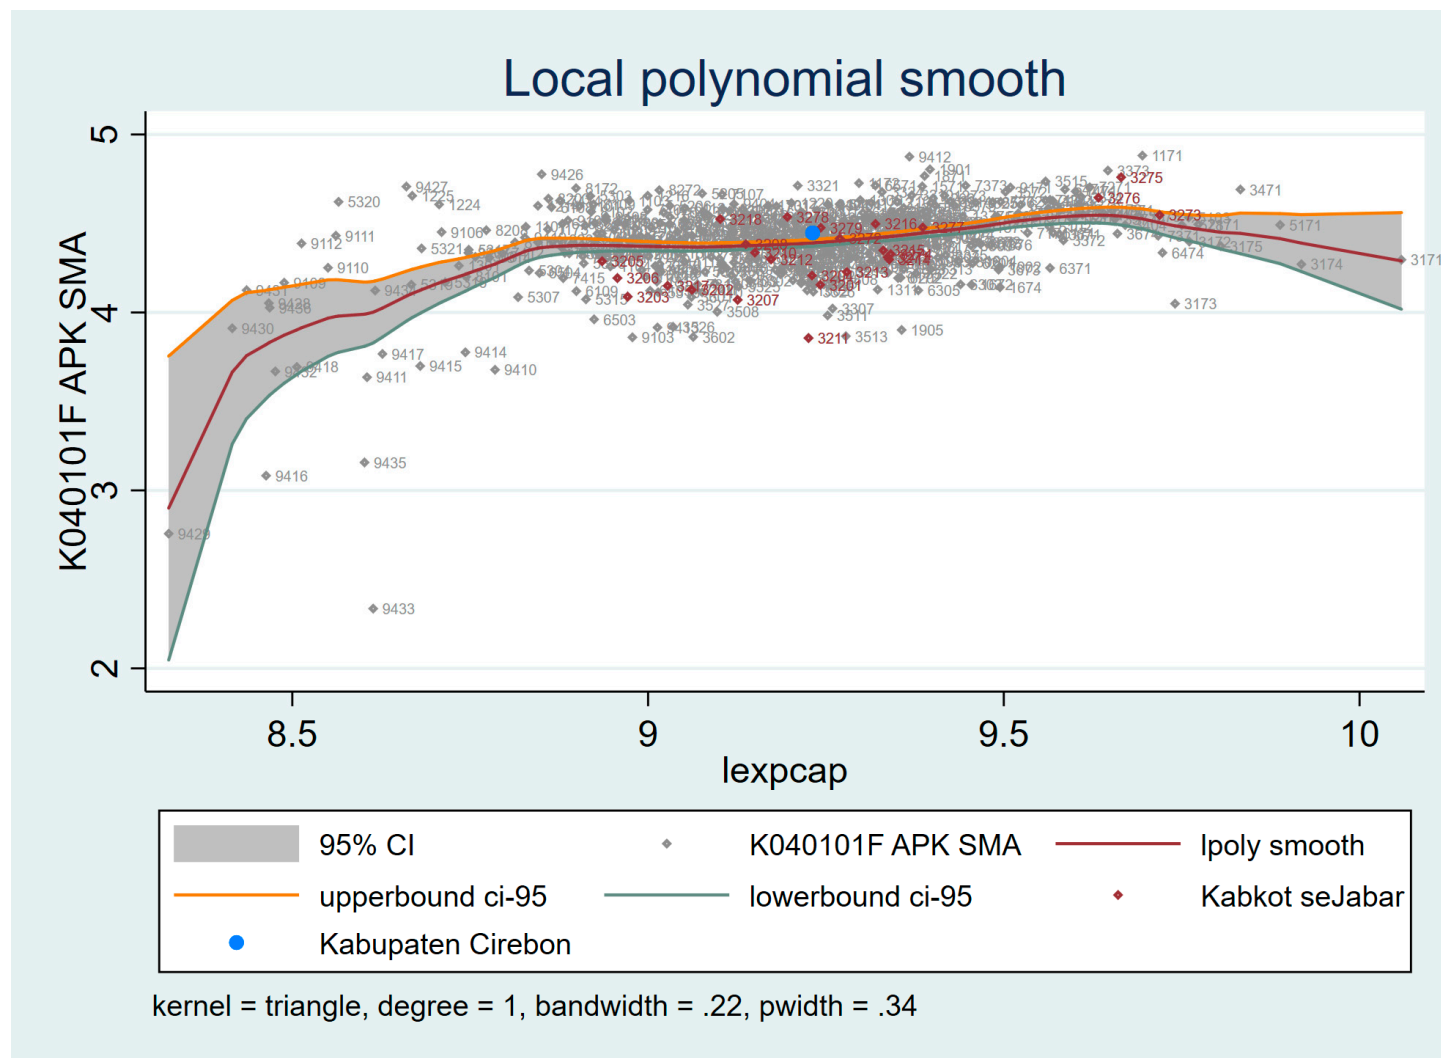

**Figure S20. Performance of Gross Enrollment Rate of Upper-secondary School on per capita income**

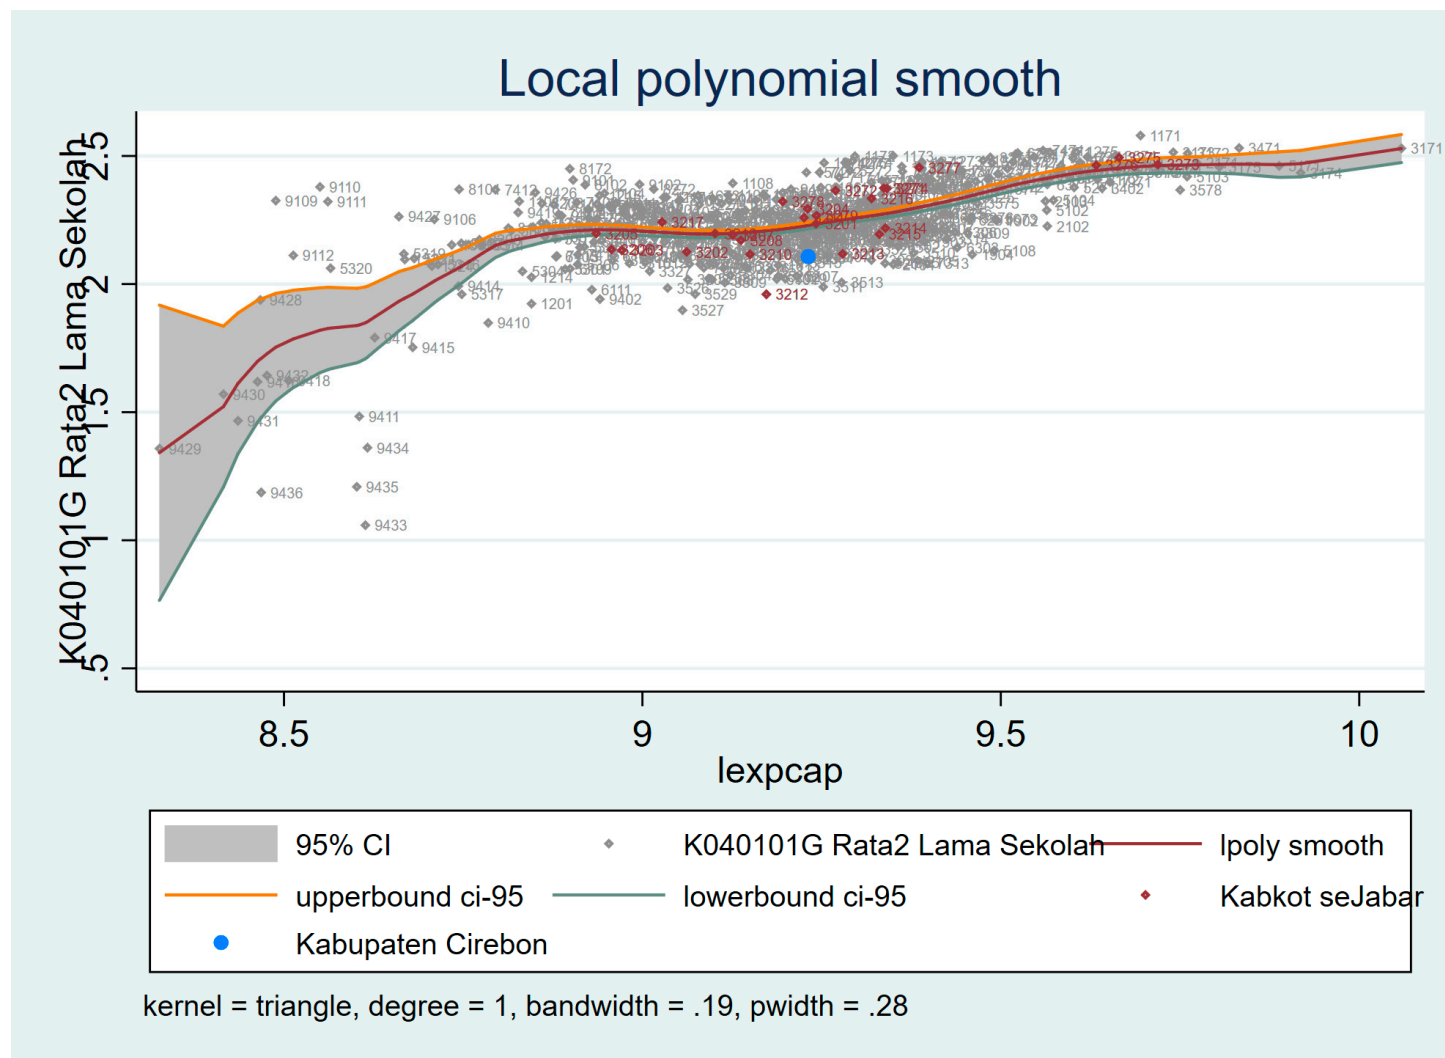

**Figure S21. Performance of Mean Year School on per capita income**

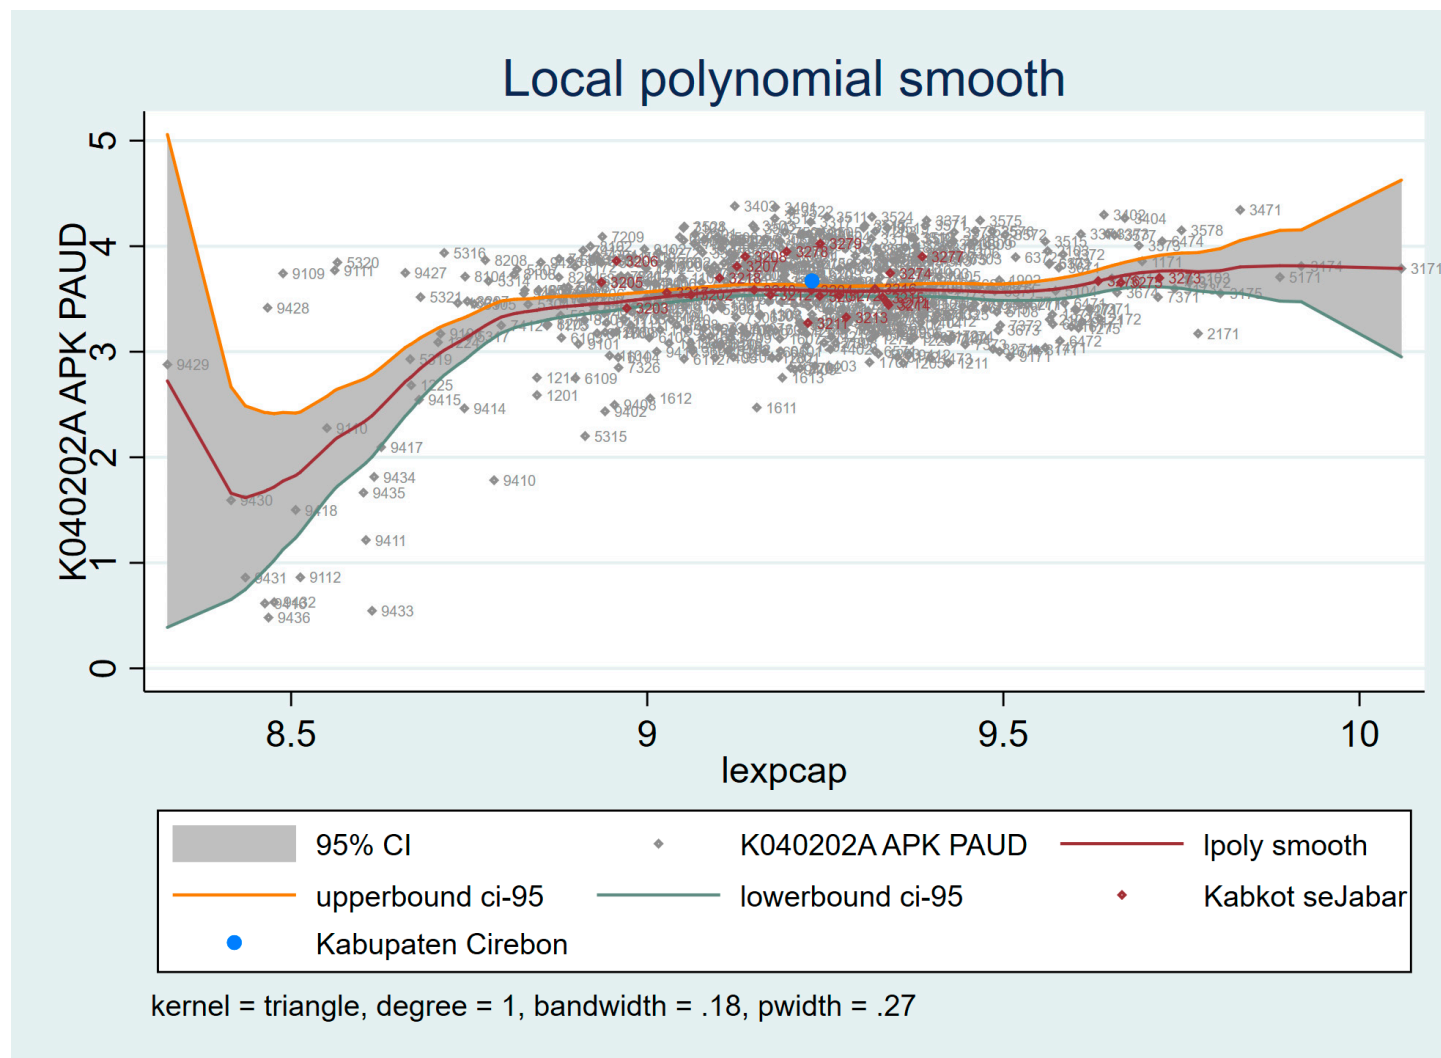

**Figure S22. Performance of Gross Enrollment Rate of Early Childhood Education on per capita income**

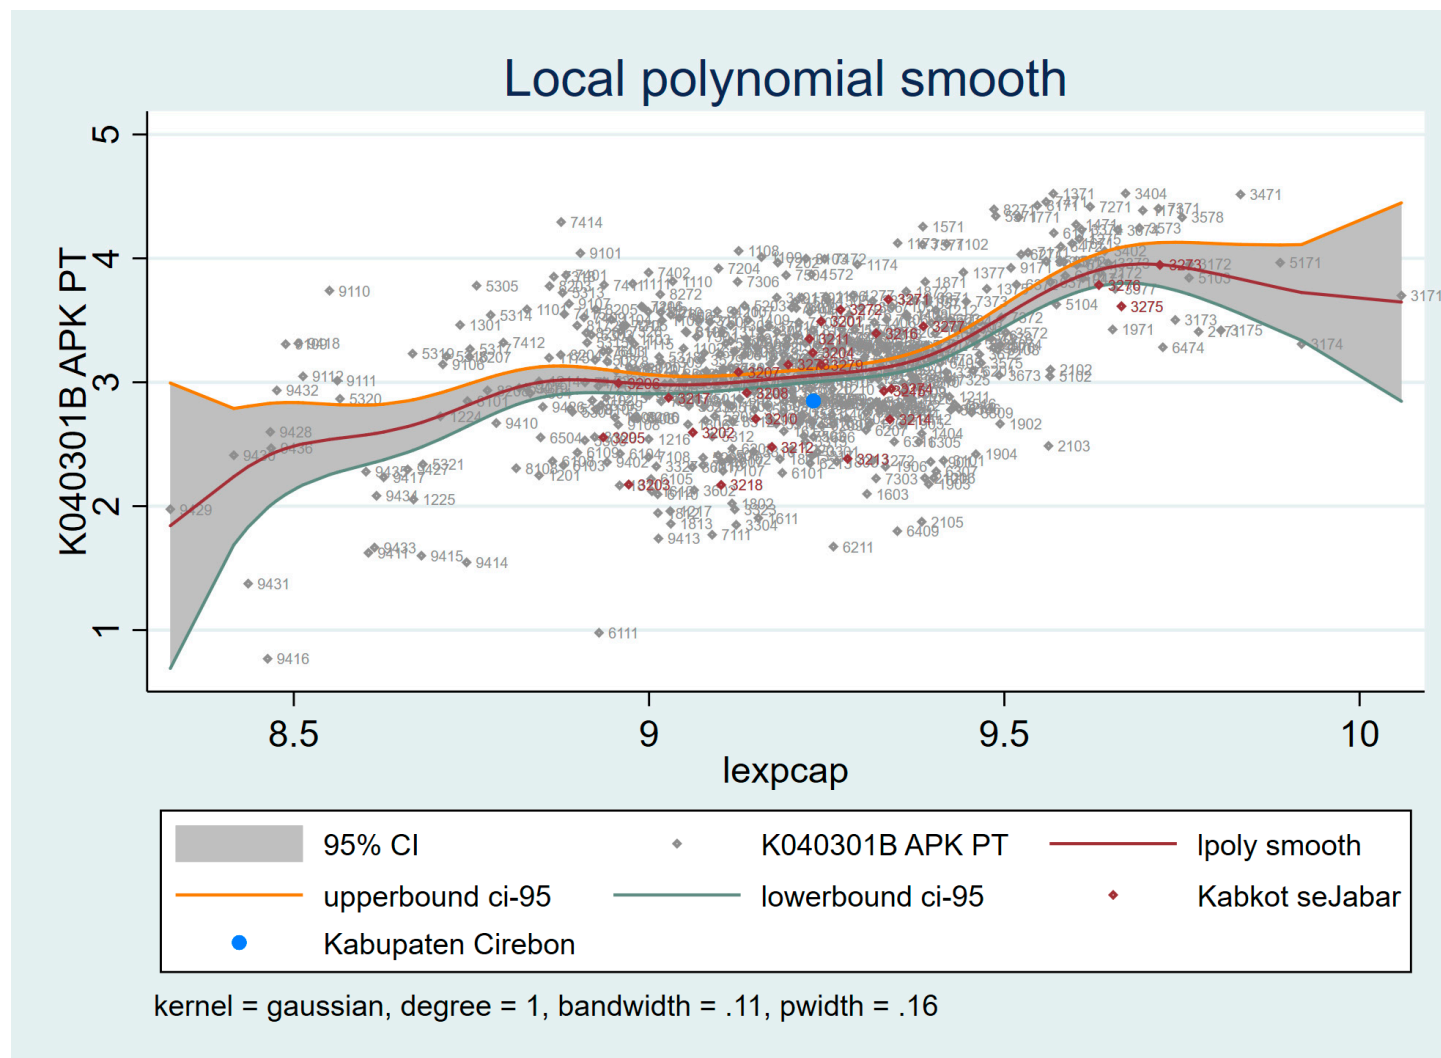

**Figure S23. Performance of Gross Enrollment Rate of University on per capita income**

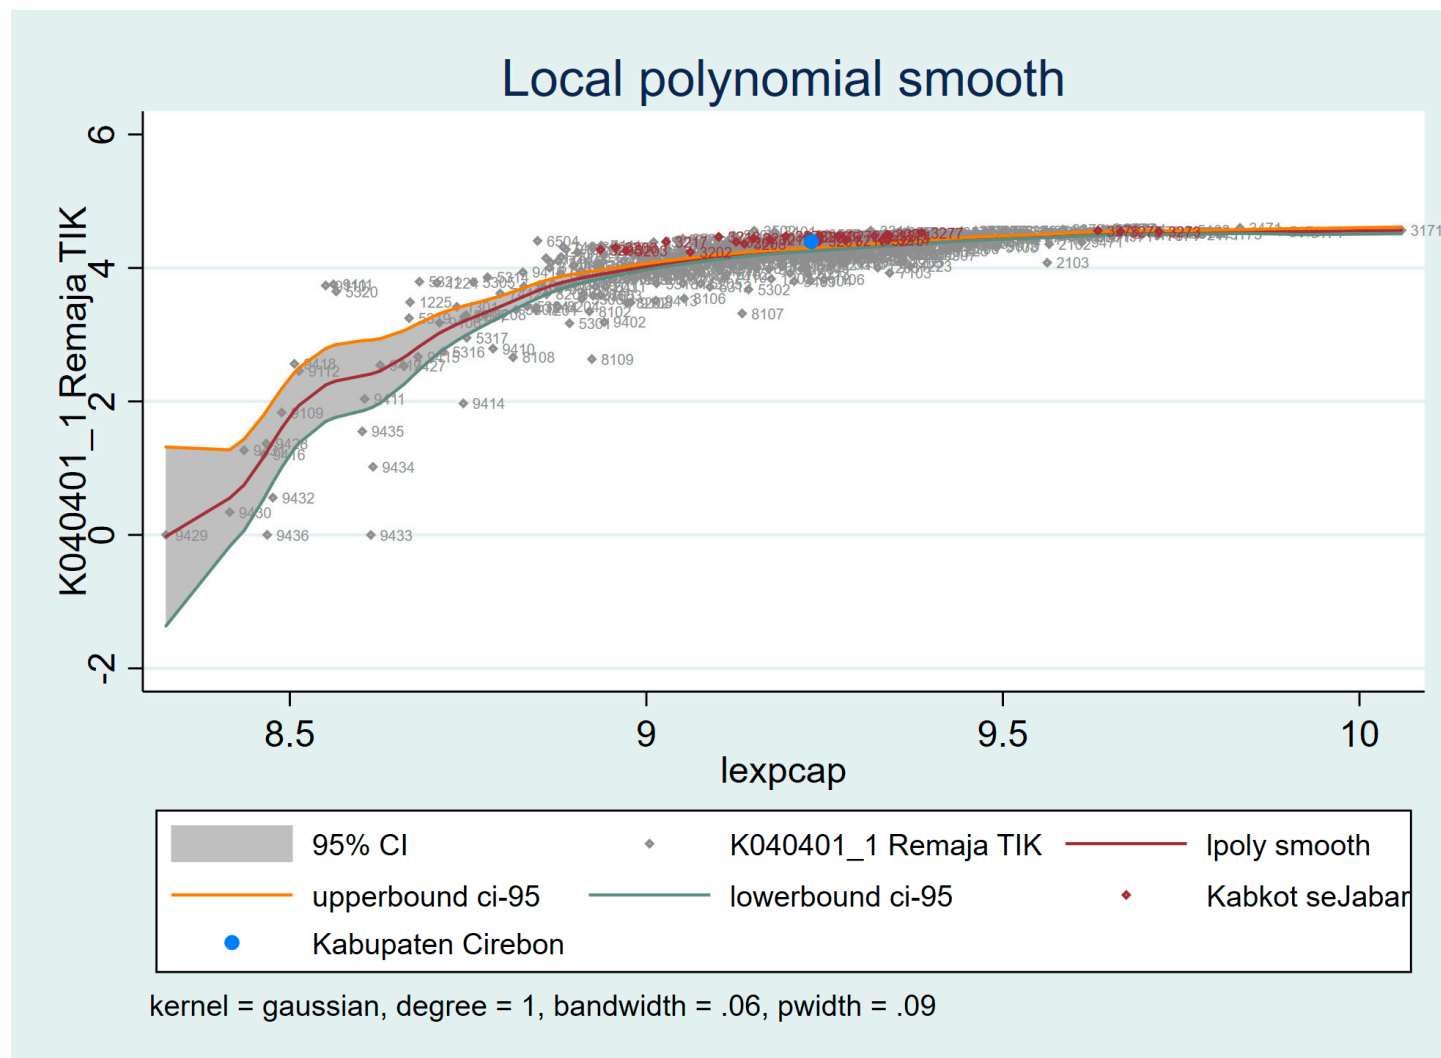

**Figure S24. Performance of Youth with ICT on per capita income**



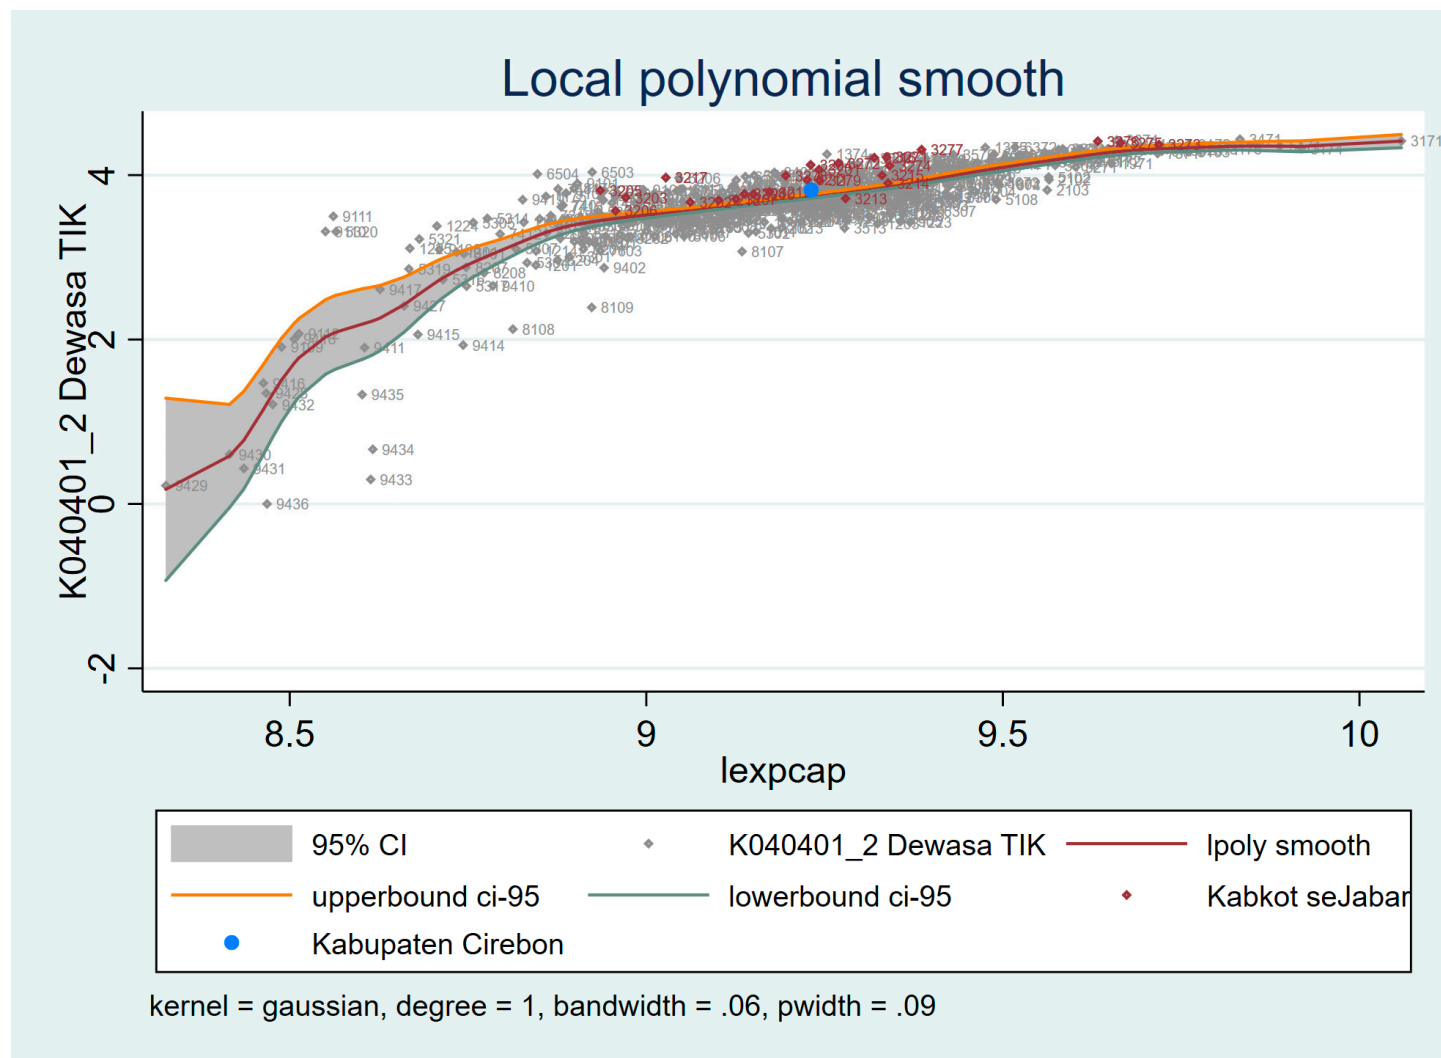

**Figure S25. Performance of Adults with ICT on per capita income**

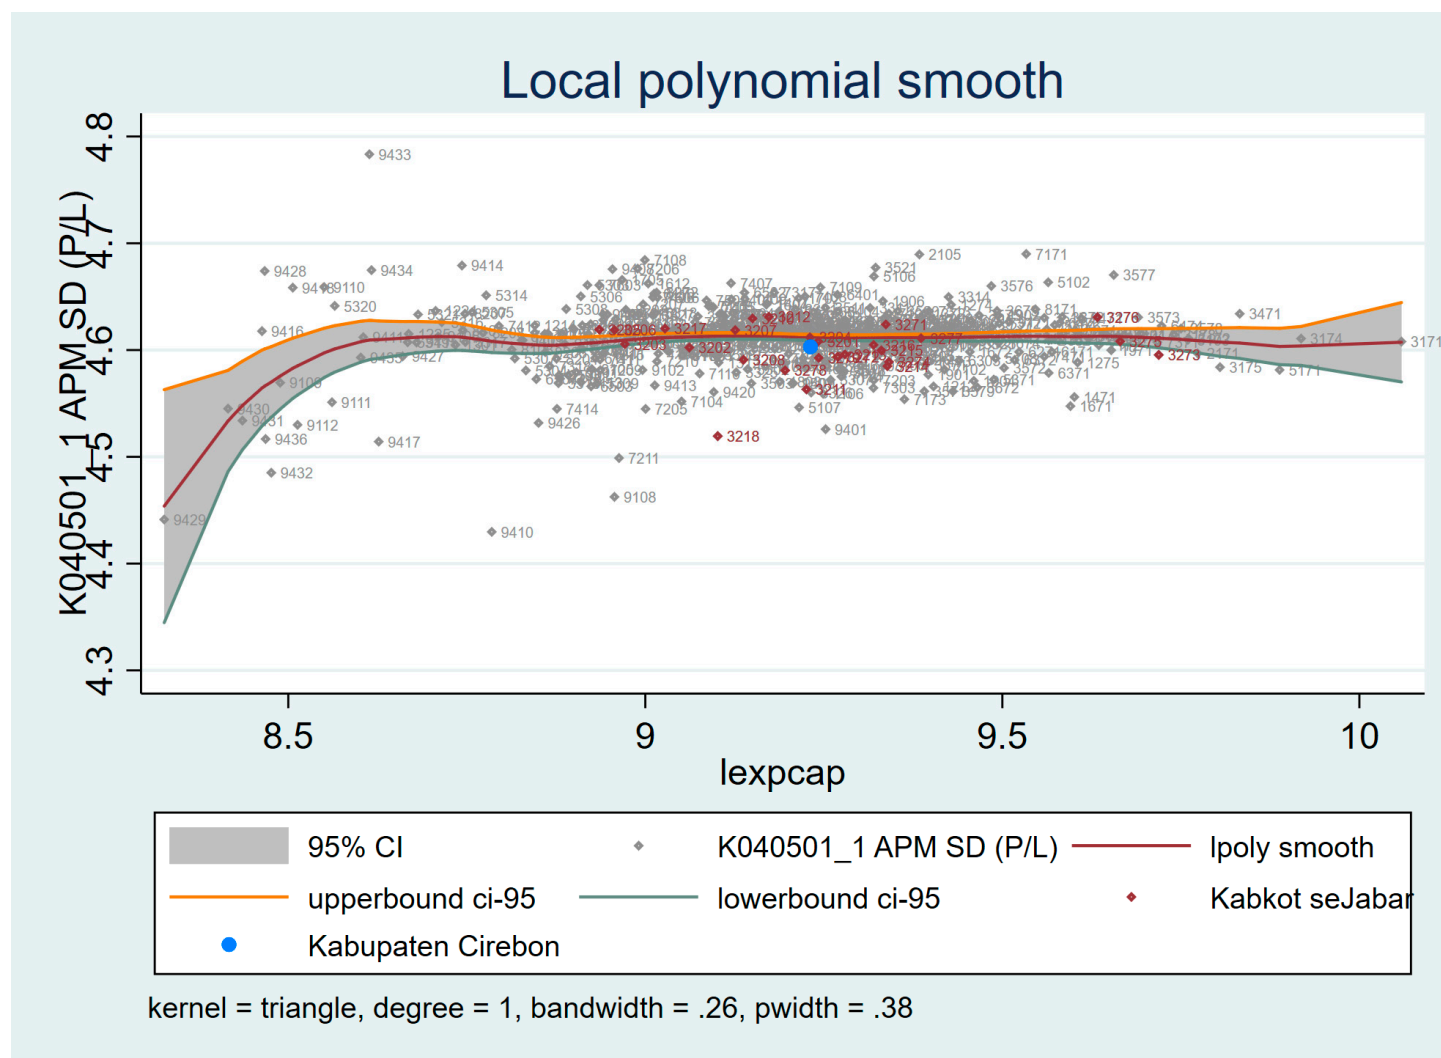

**Figure S26. Performance of Gender Gap (F/M) Net Enrollment Rate of Primary School on per capita income**

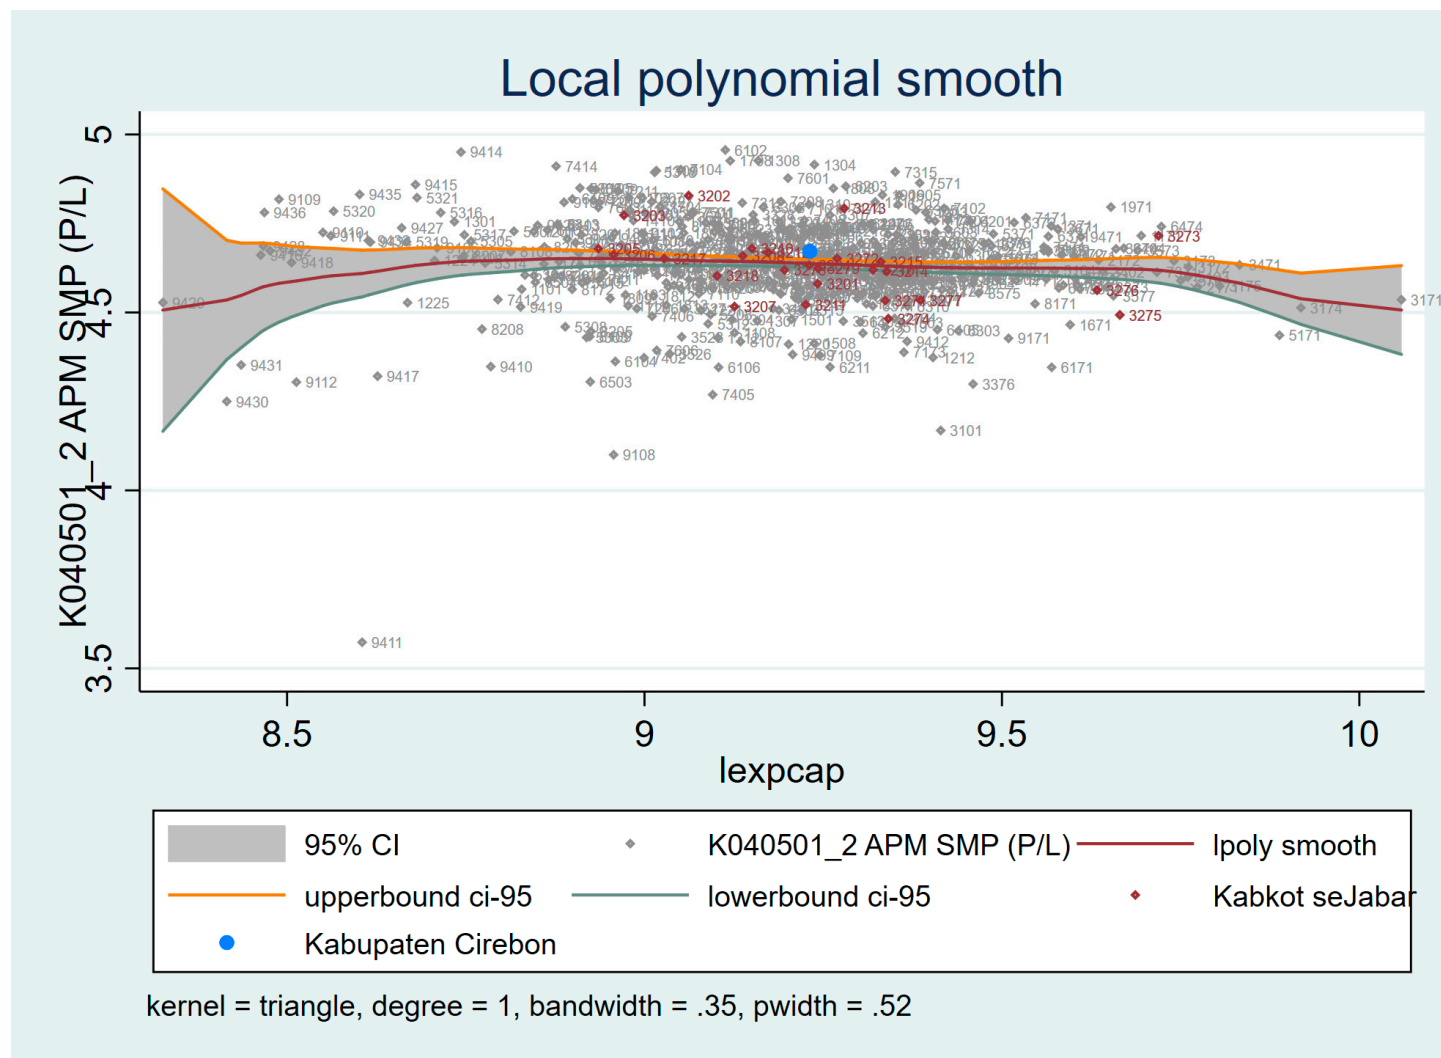

**Figure S27. Performance of Gender Gap (F/M) Net Enrollment Rate of Lower-secondary School on per capita income**

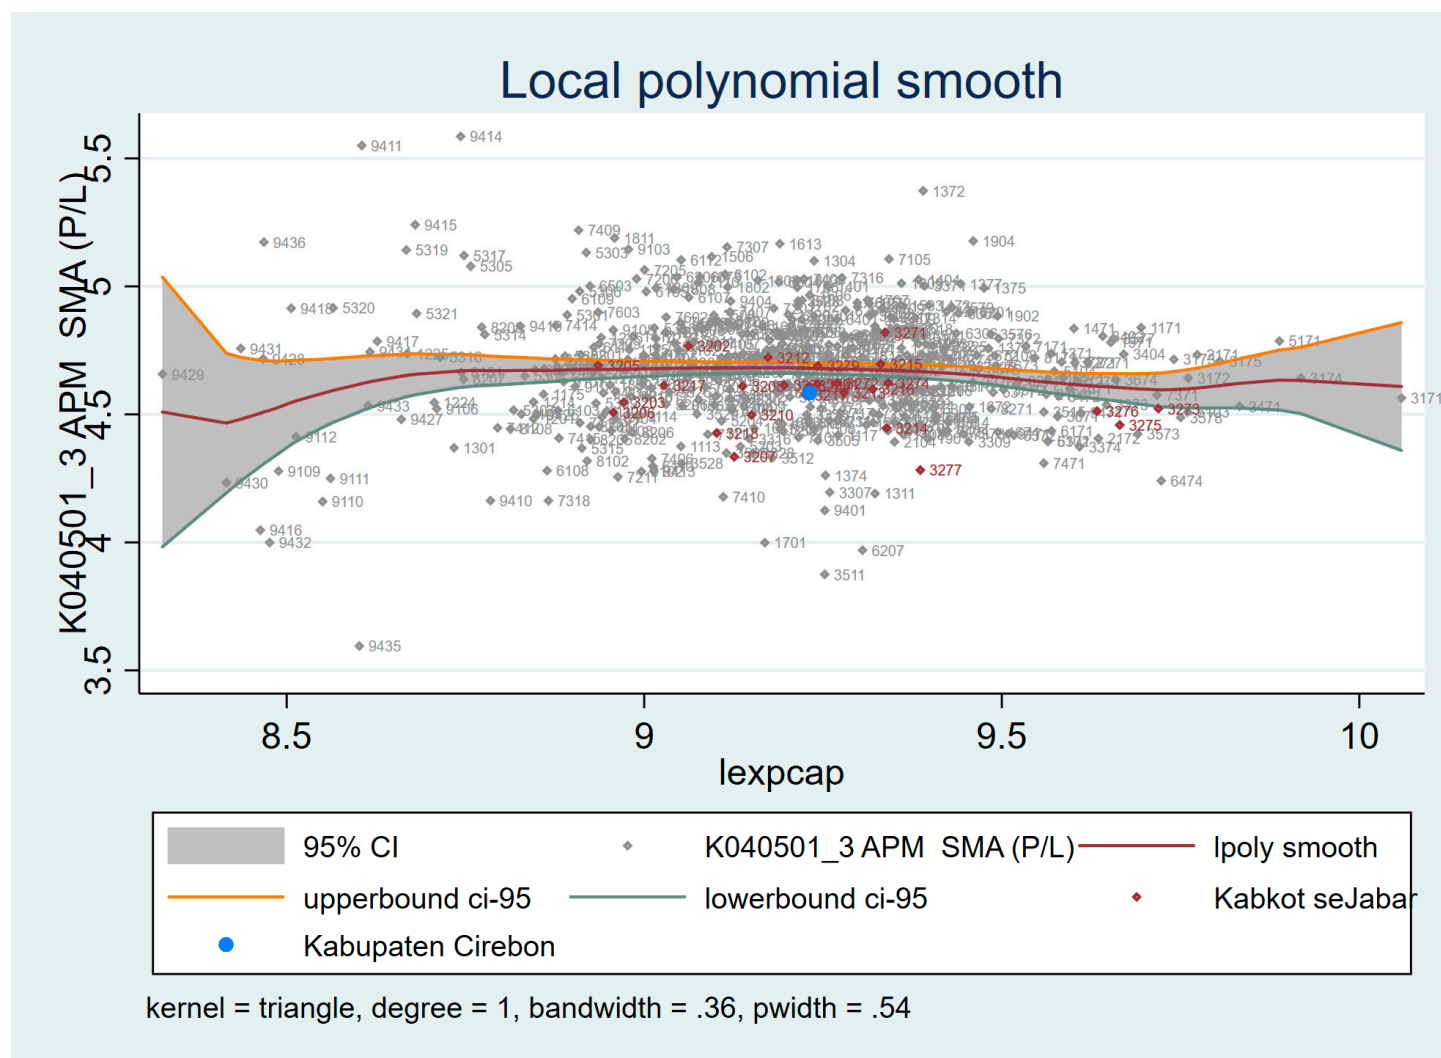

**Figure S28. Performance of Gender Gap (F/M) Net Enrollment Rate of Upper-secondary School on per capita income**

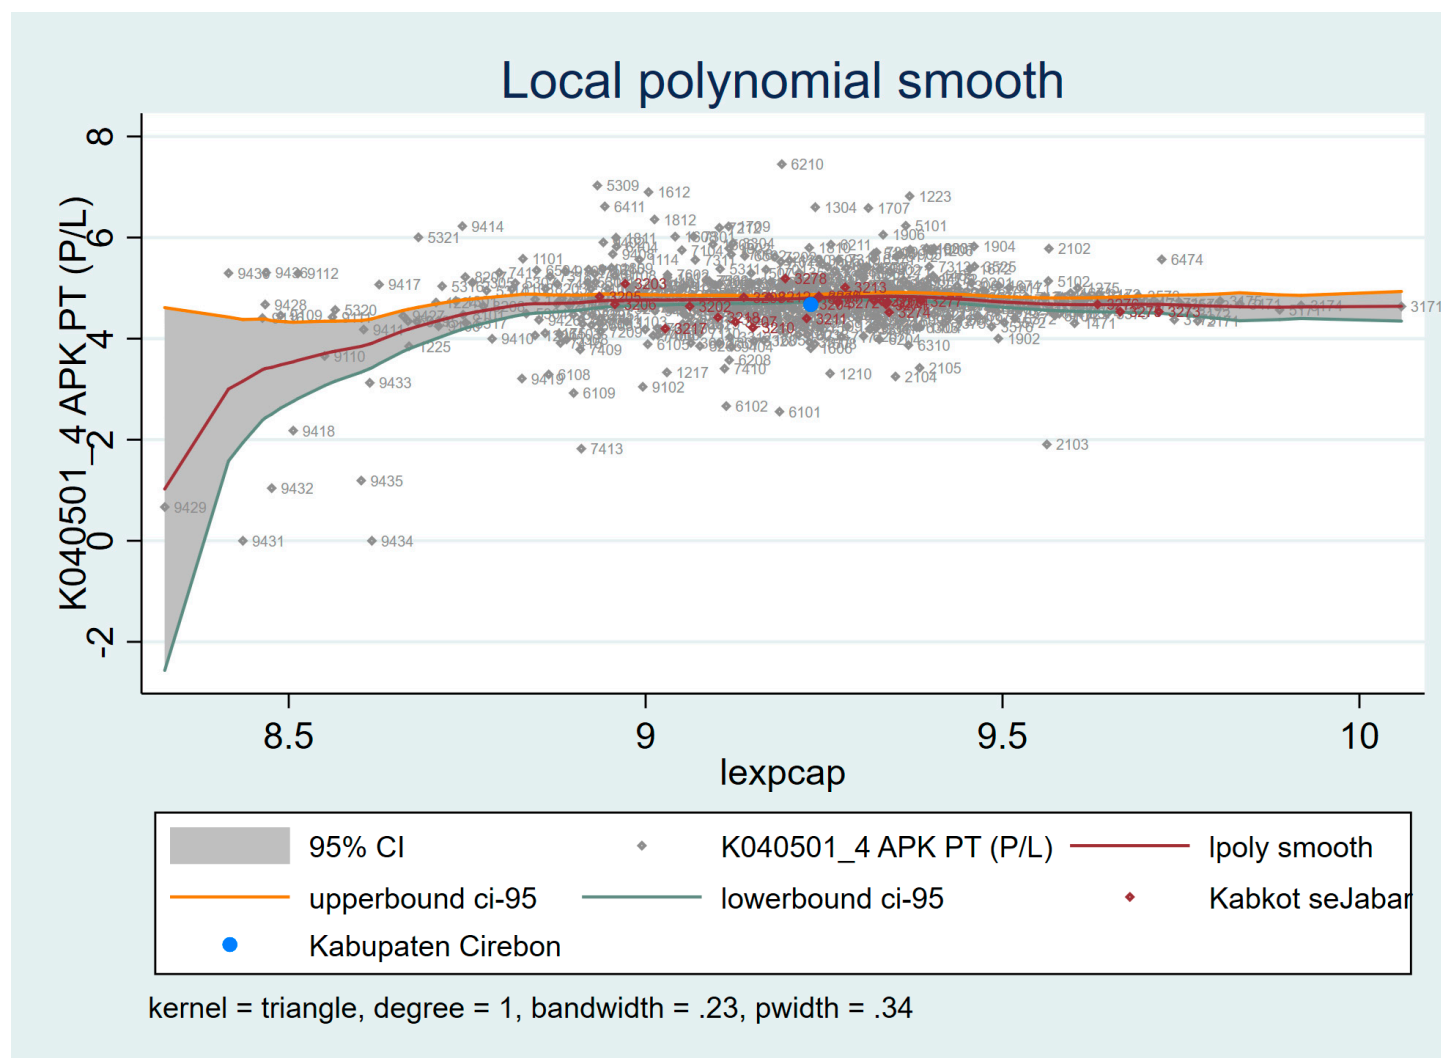

**Figure S29. Performance of Gender Gap (F/M) Net Enrollment Rate of University on per capita income**





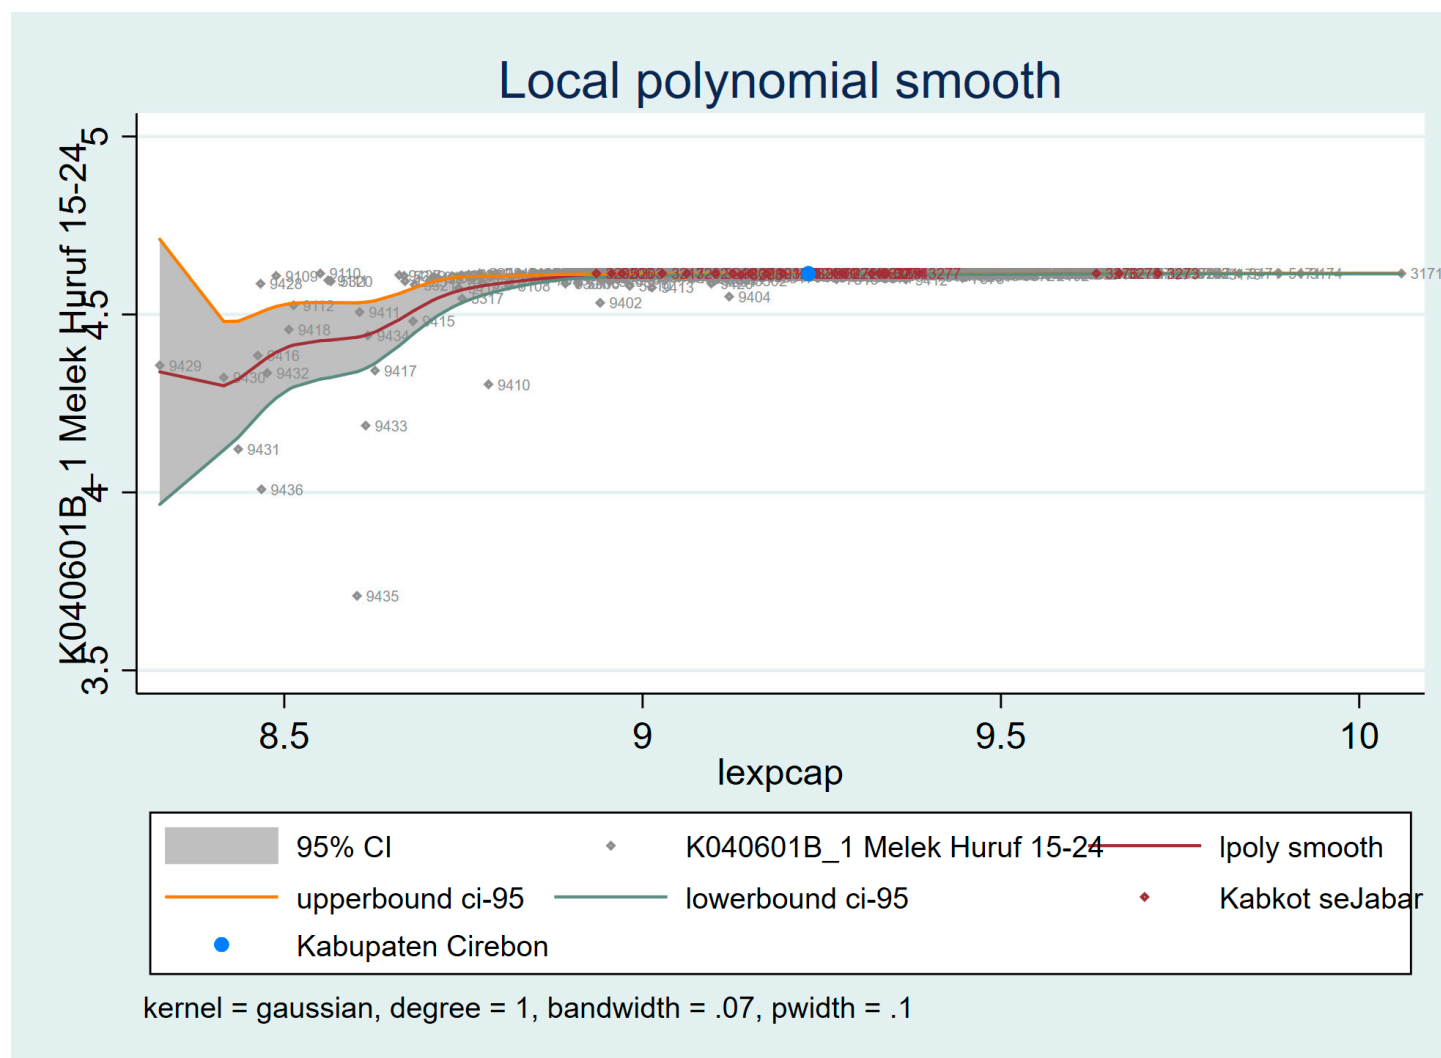

**Figure S31. Performance of Literacy Rate 15-24 on per capita income**

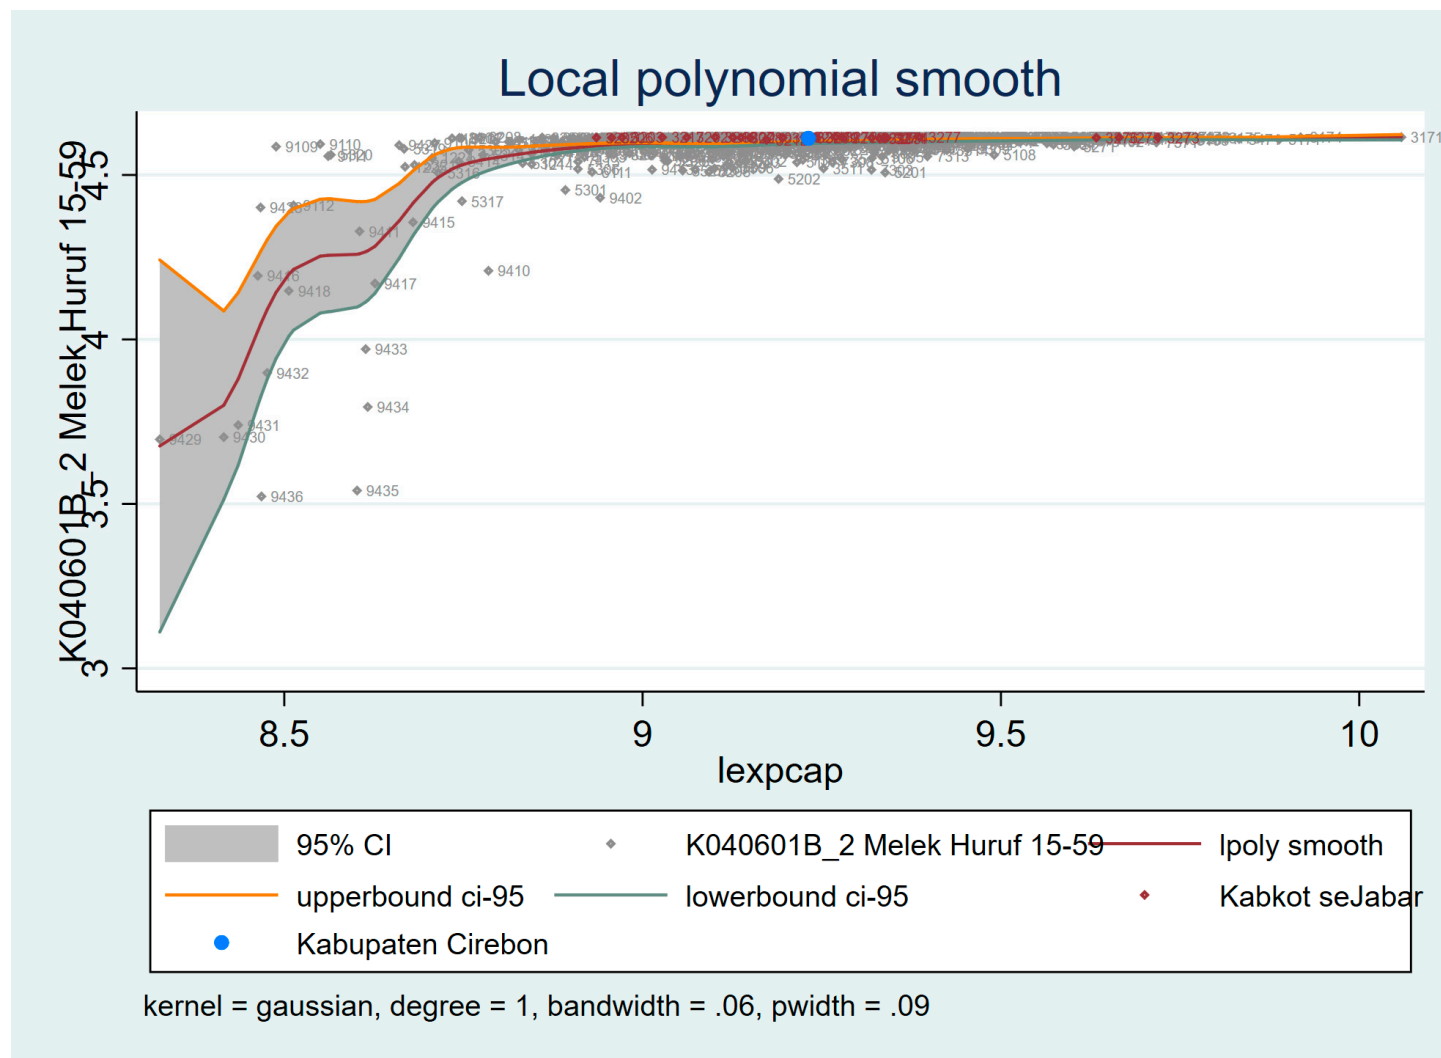

**Figure S32. Performance of Literacy Rate 15-59 on per capita income**

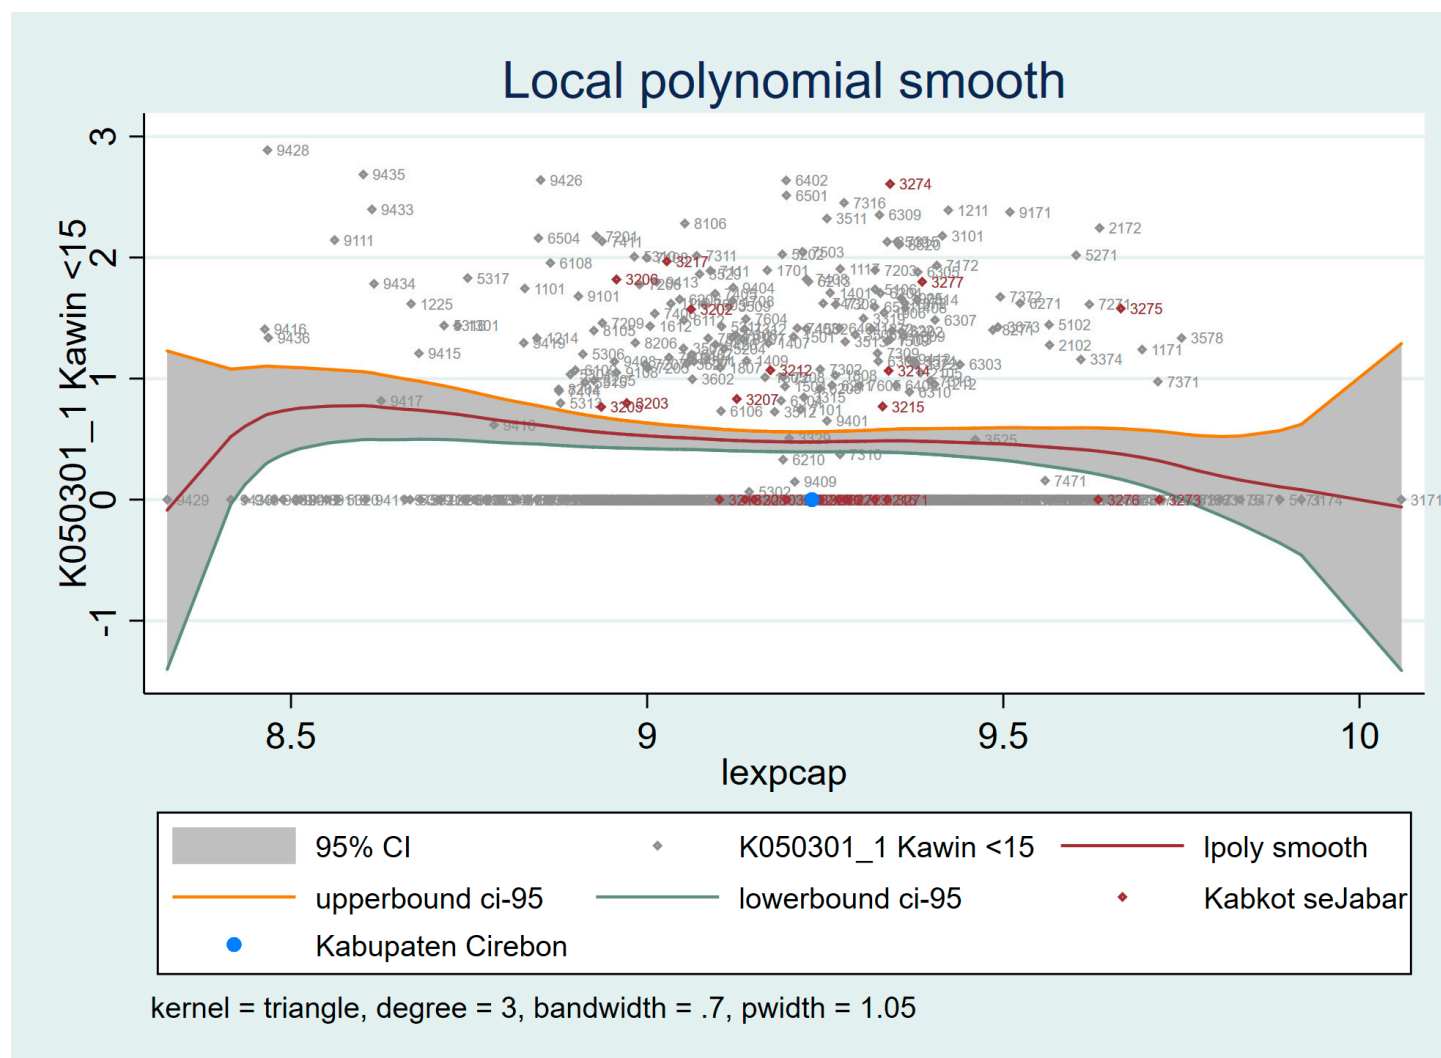

**Figure S33. Performance of Married Women <15 on per capita income**

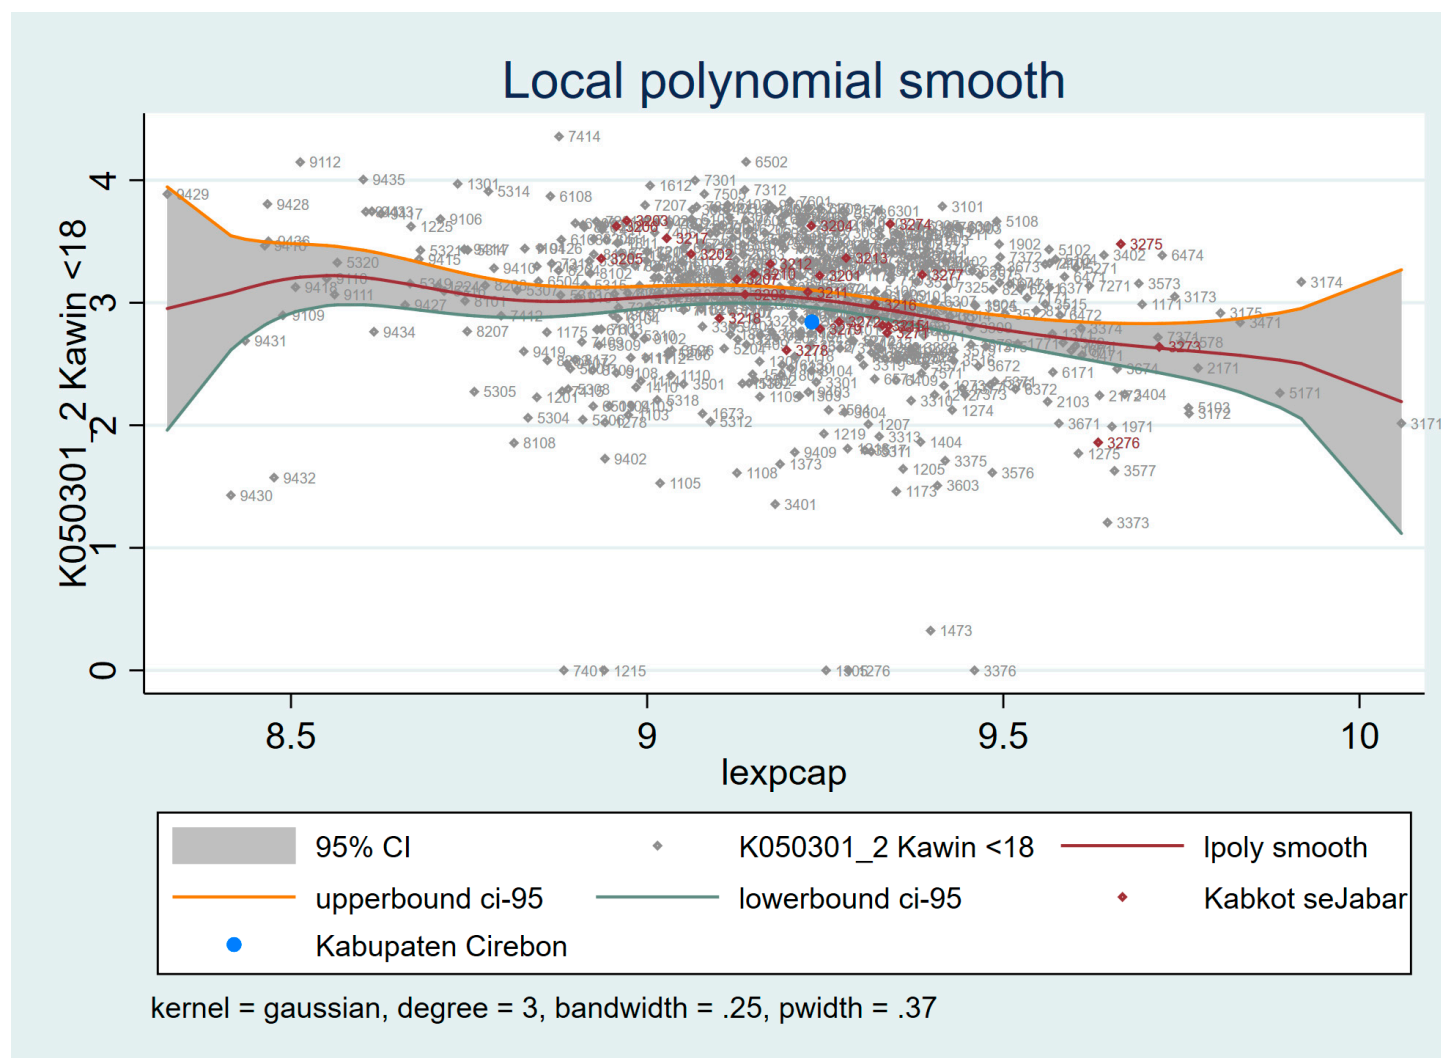

**Figure S34. Performance of Married Women <18 on per capita income**

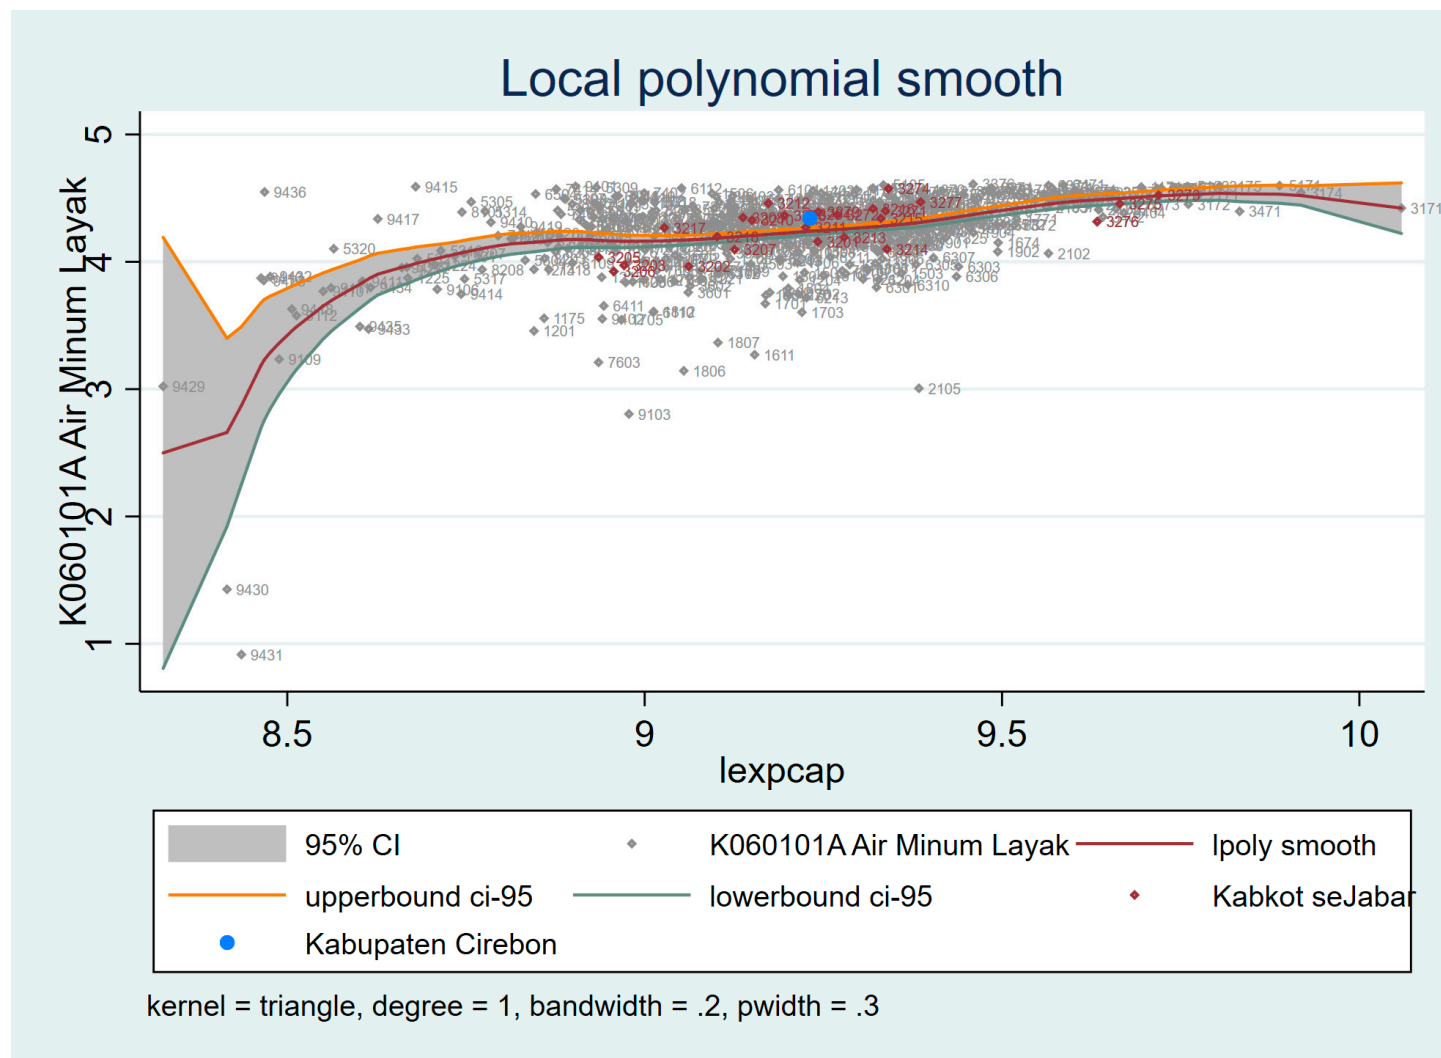

**Figure S35. Performance of Access to Safely Drinking Water on per capita income**

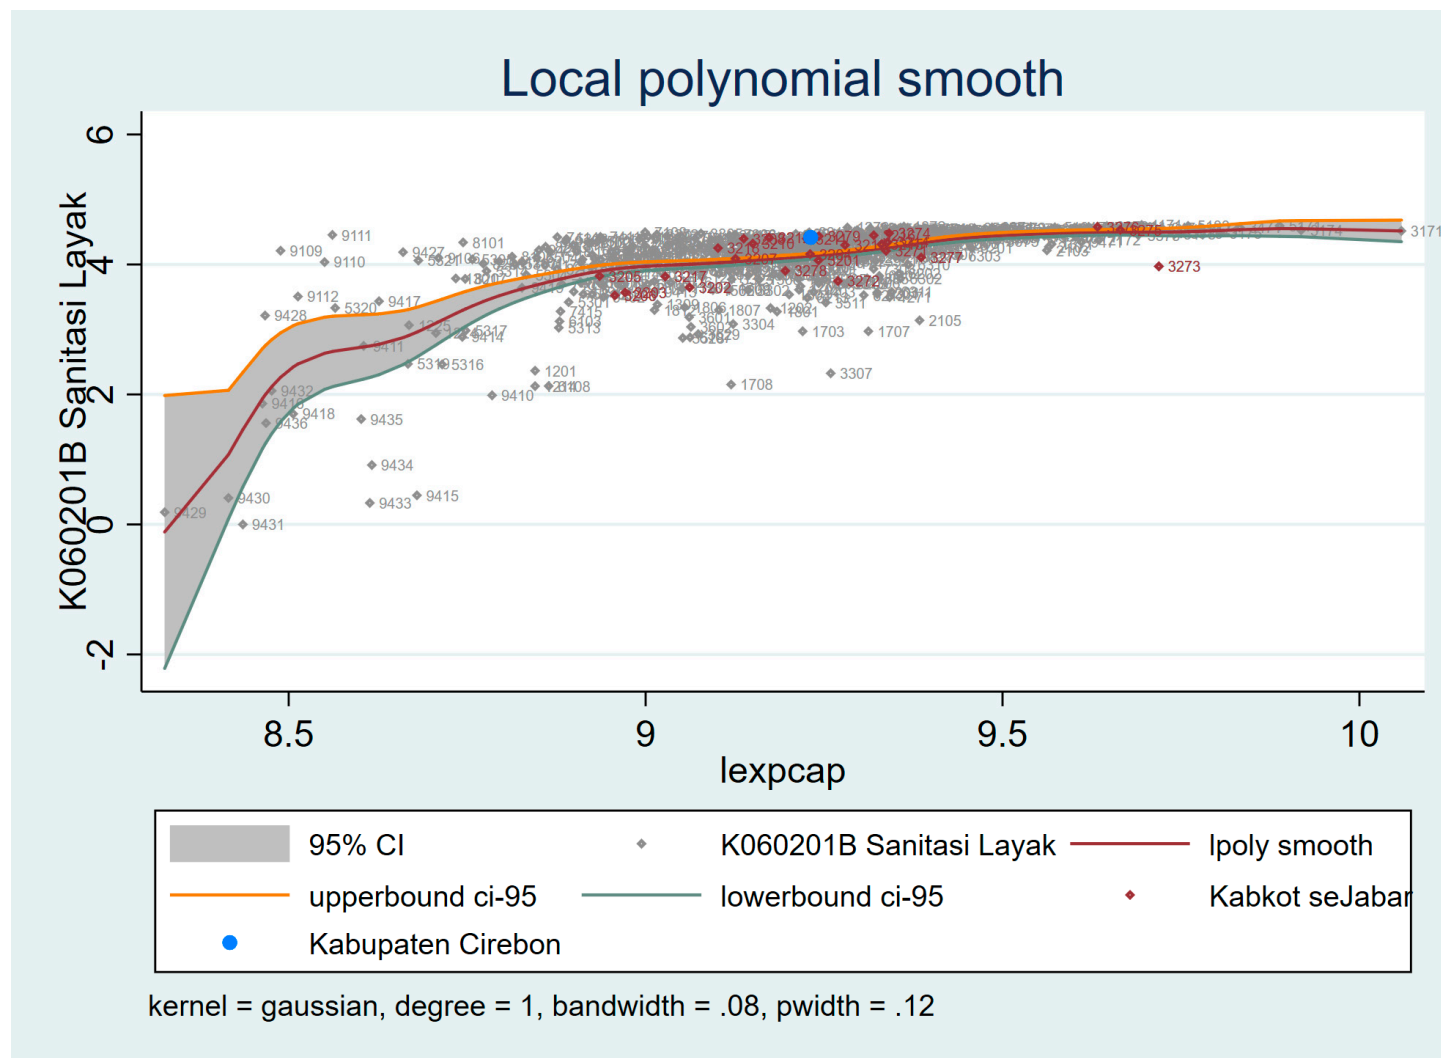

**Figure S36. Performance of Sanitation on per capita income**



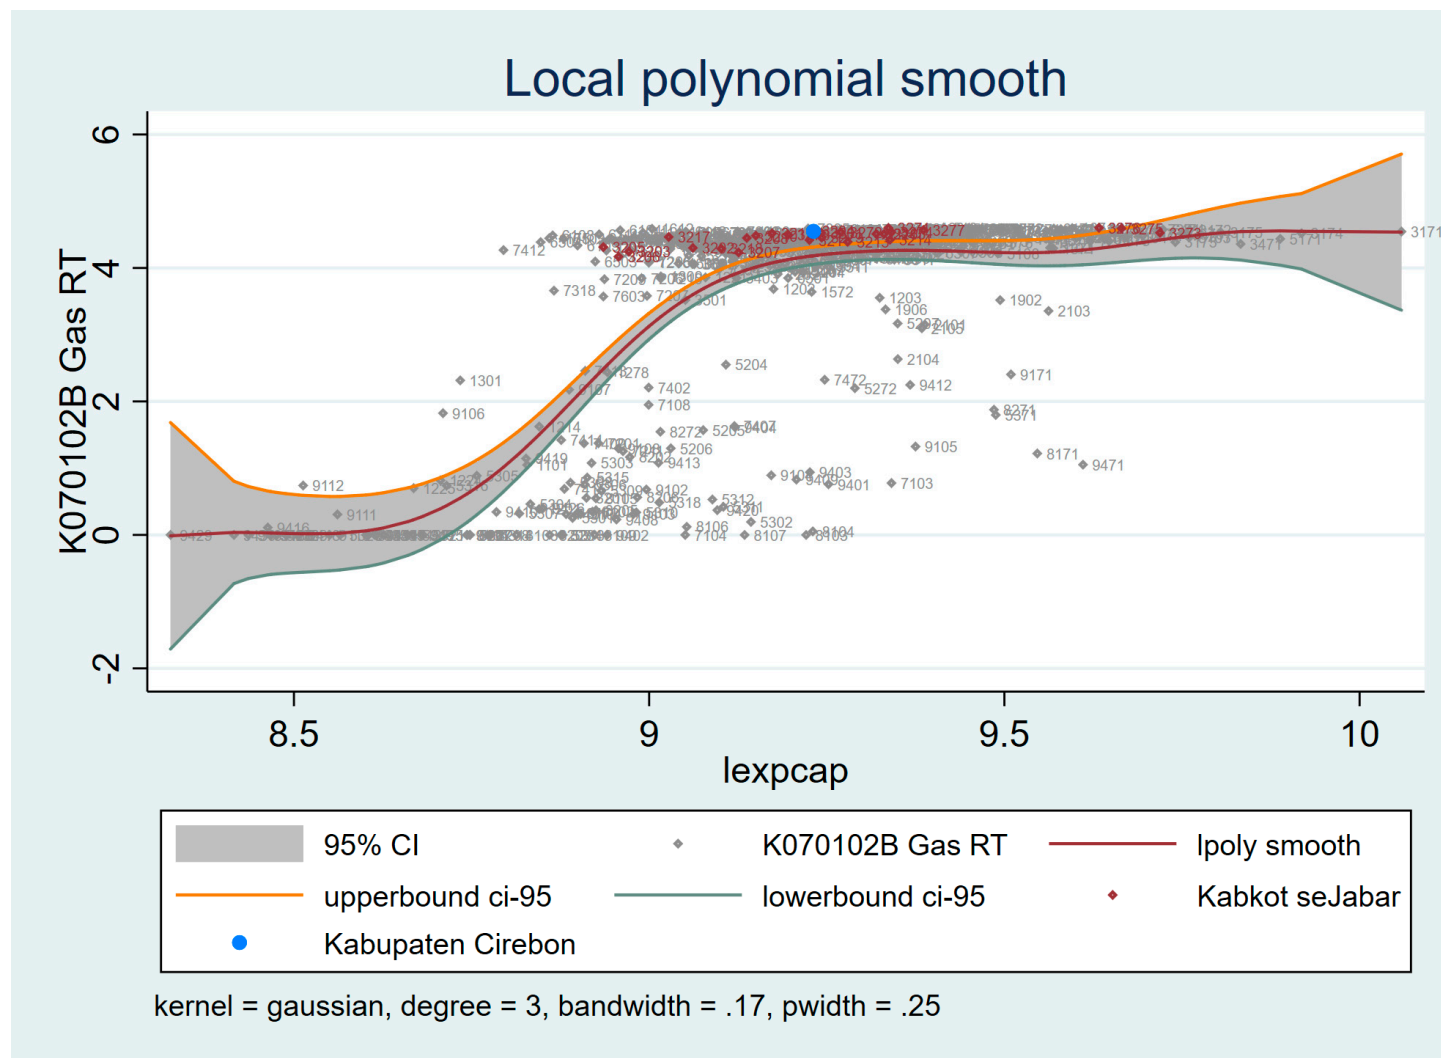

**Figure S37. Performance of Household Gas on per capita income**

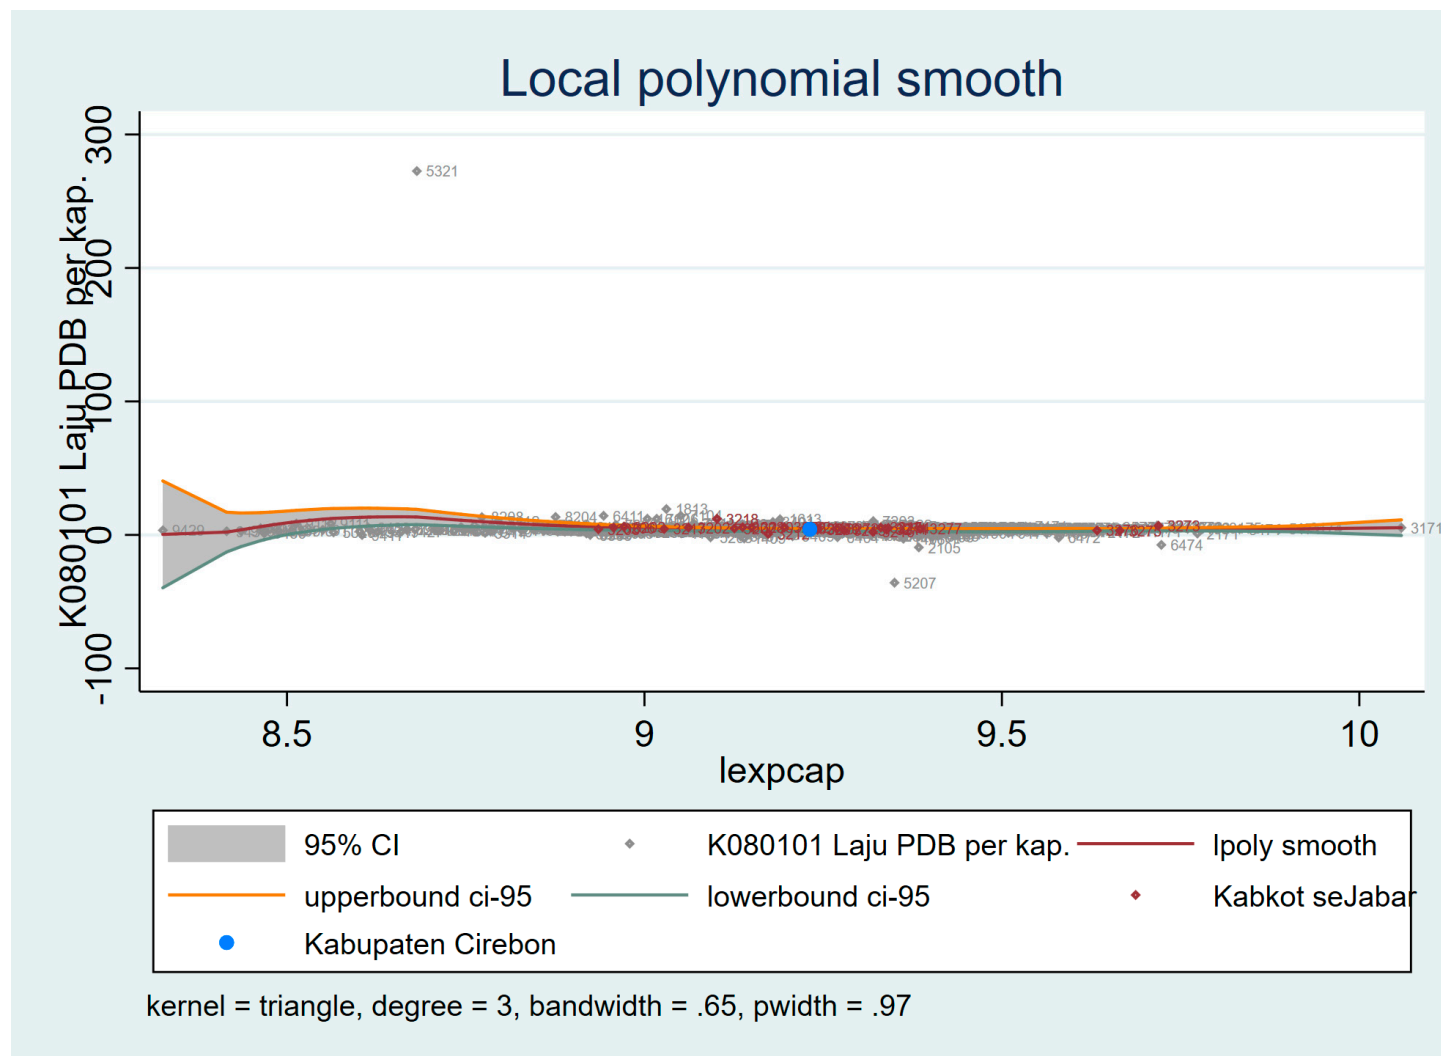

**Figure S38. Performance of Annual growth rate of GDP per capita on per capita income**

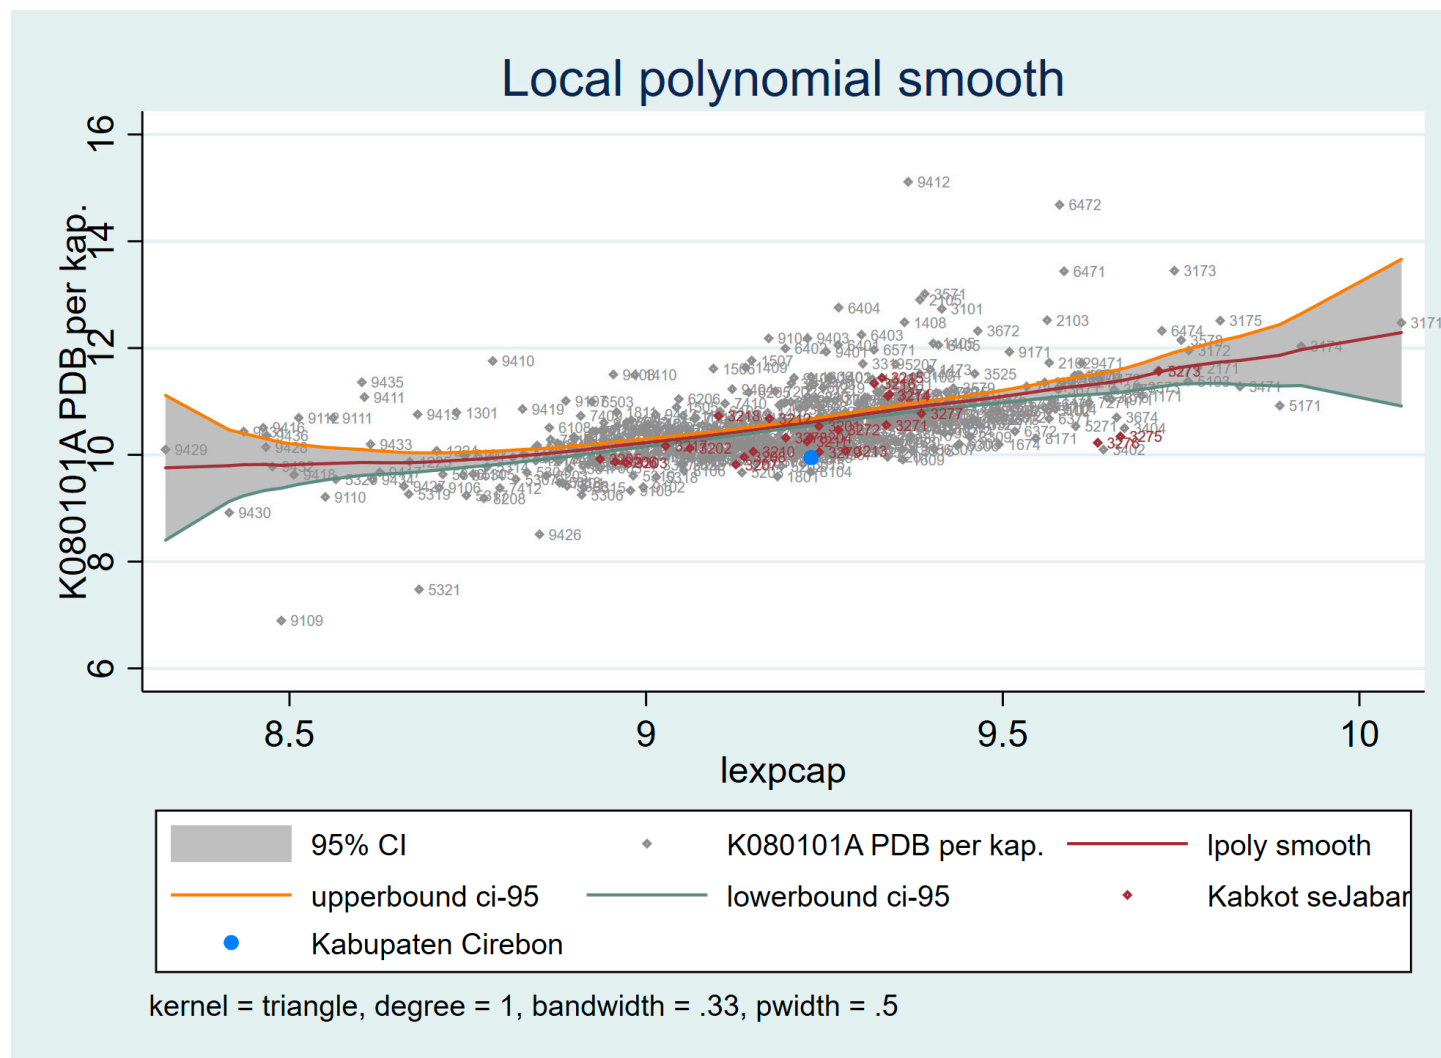

**Figure S39. Performance of per capita income on per capita income**

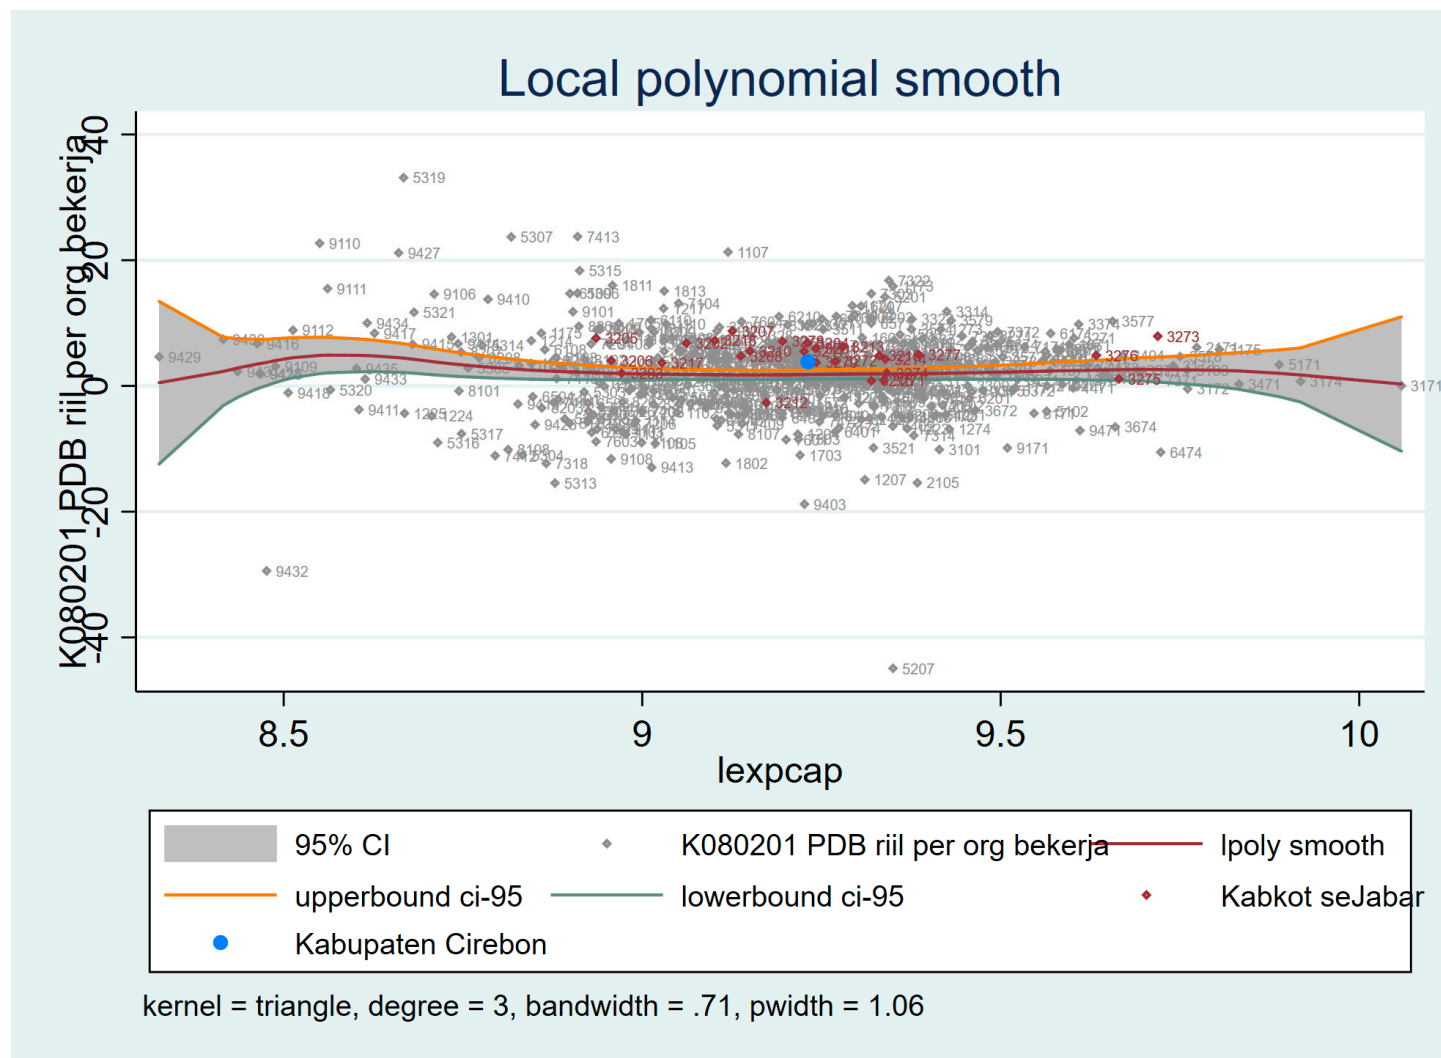

**Figure S40. Performance of Annual growth rate of GDP per capita employed person on per capita income**

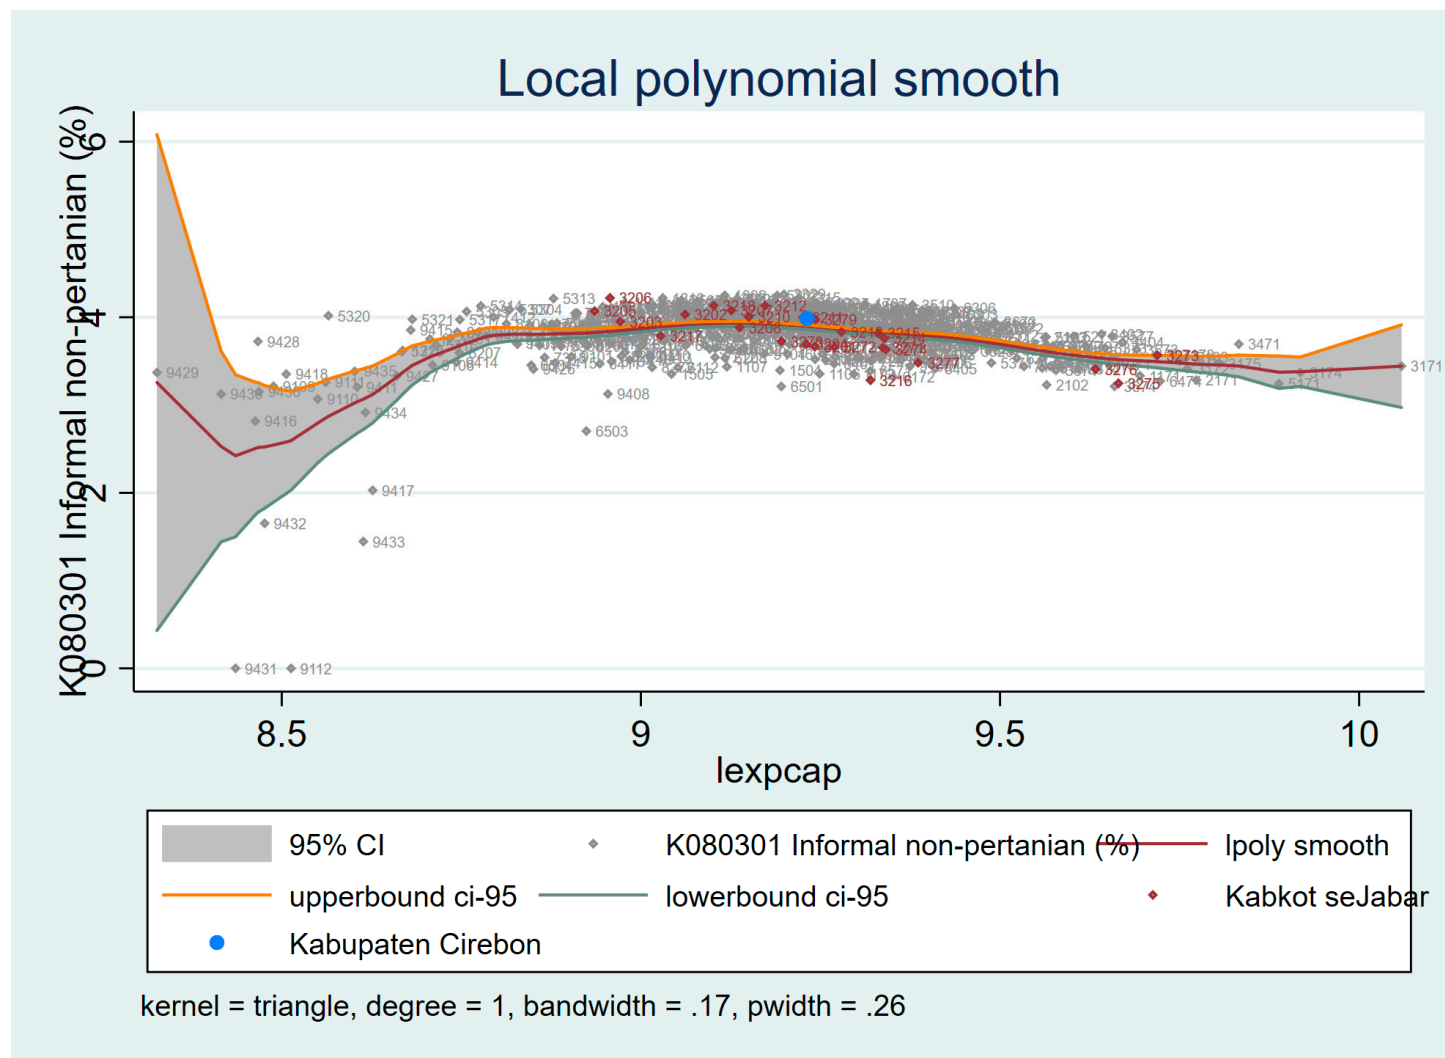

**Figure S41. Performance of Informal Employment on per capita income**

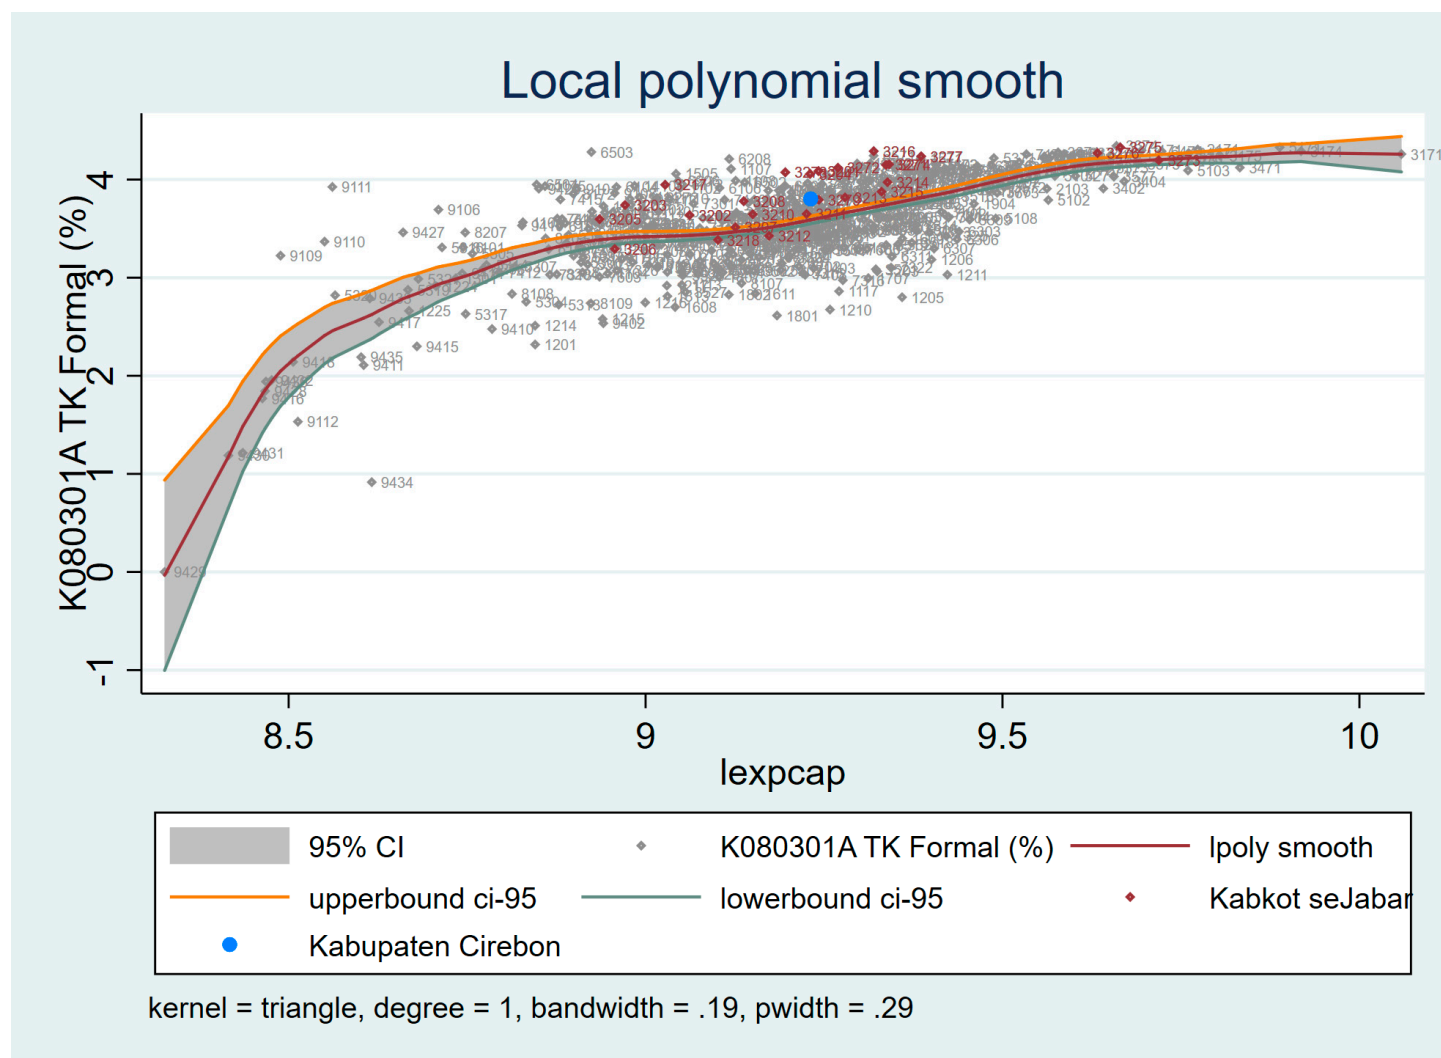

**Figure S42. Performance of Formal Employment on per capita income**

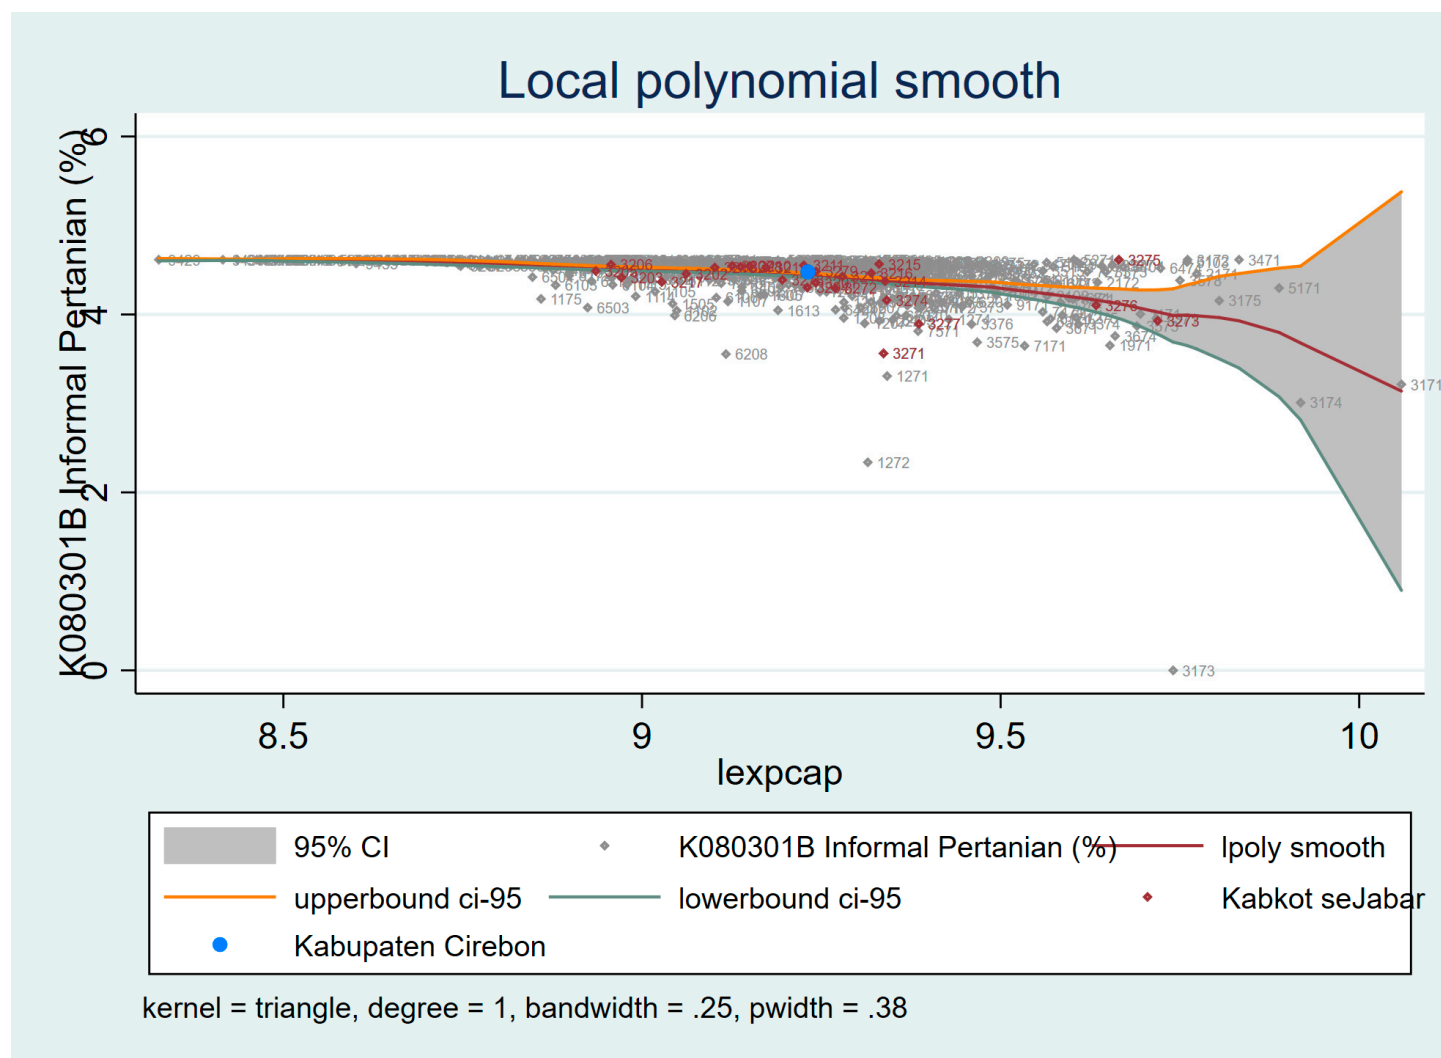

**Figure S43. Performance of Informal Agricultural Employment on per capita income**



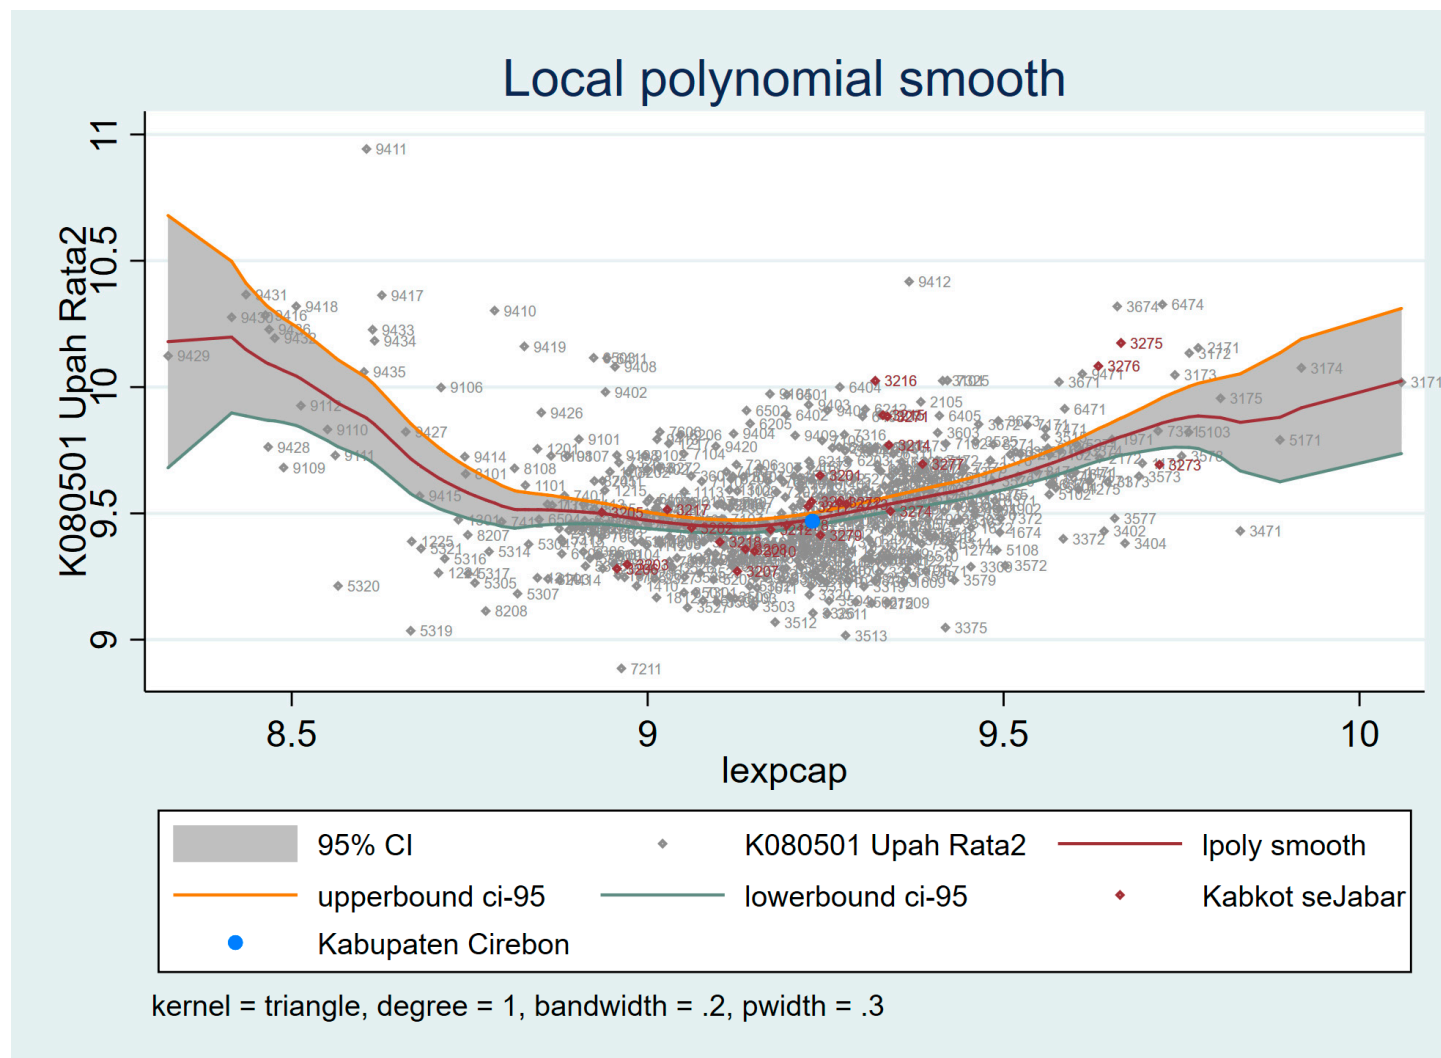

**Figure S44. Performance of Hourly Earnings on per capita income**

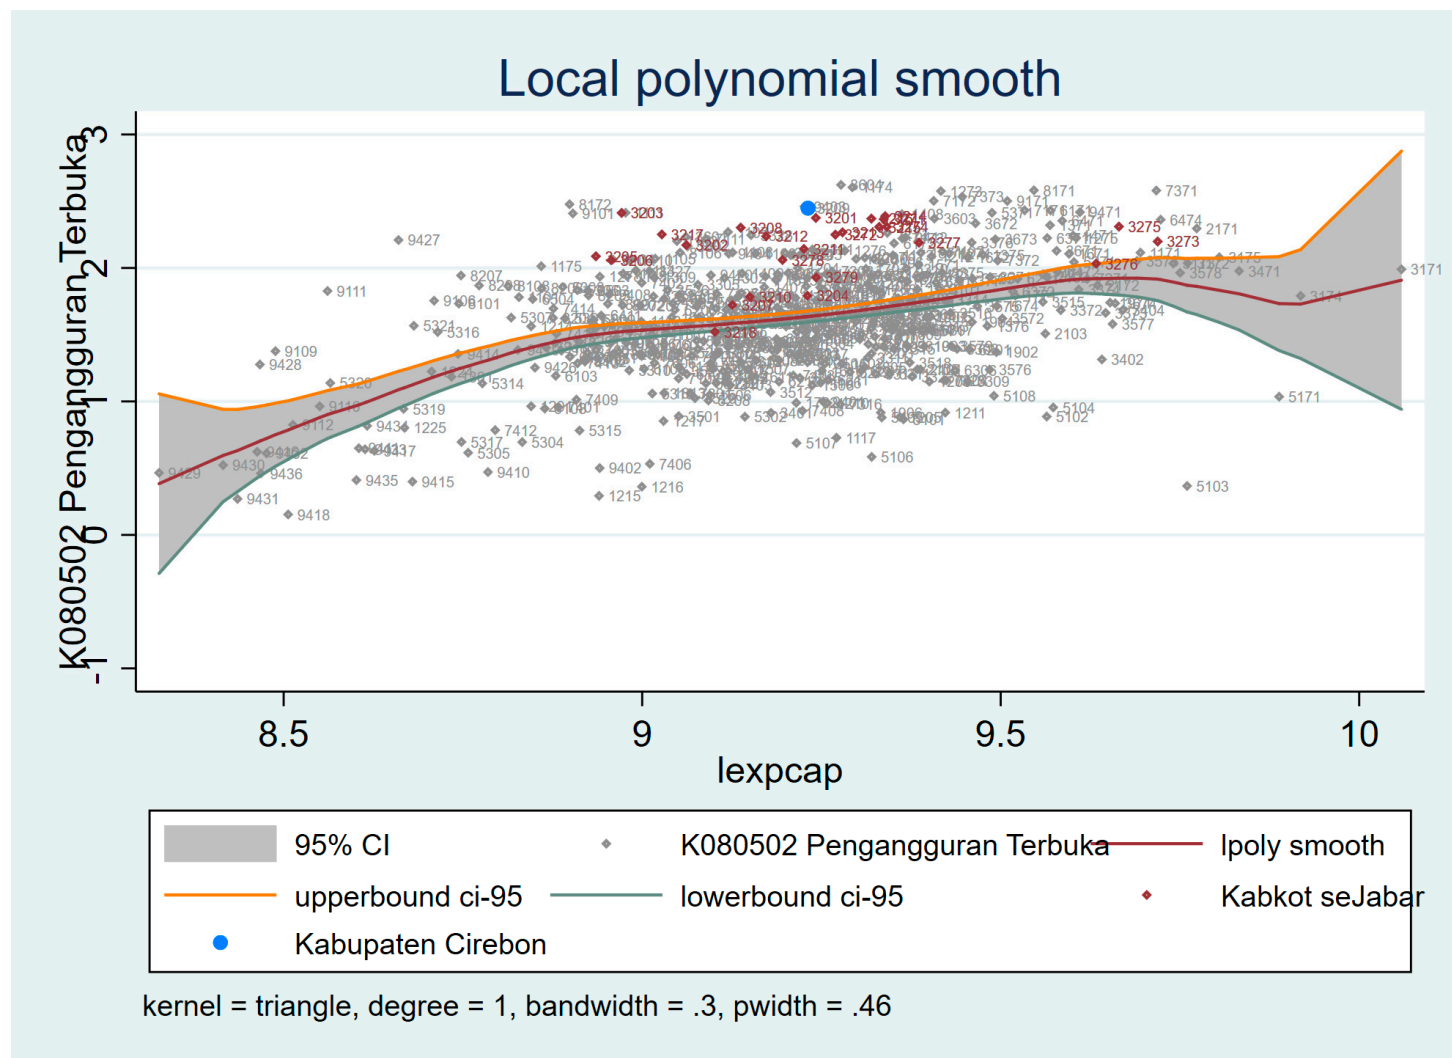

**Figure S45. Performance of Unemployment Rate on per capita income**

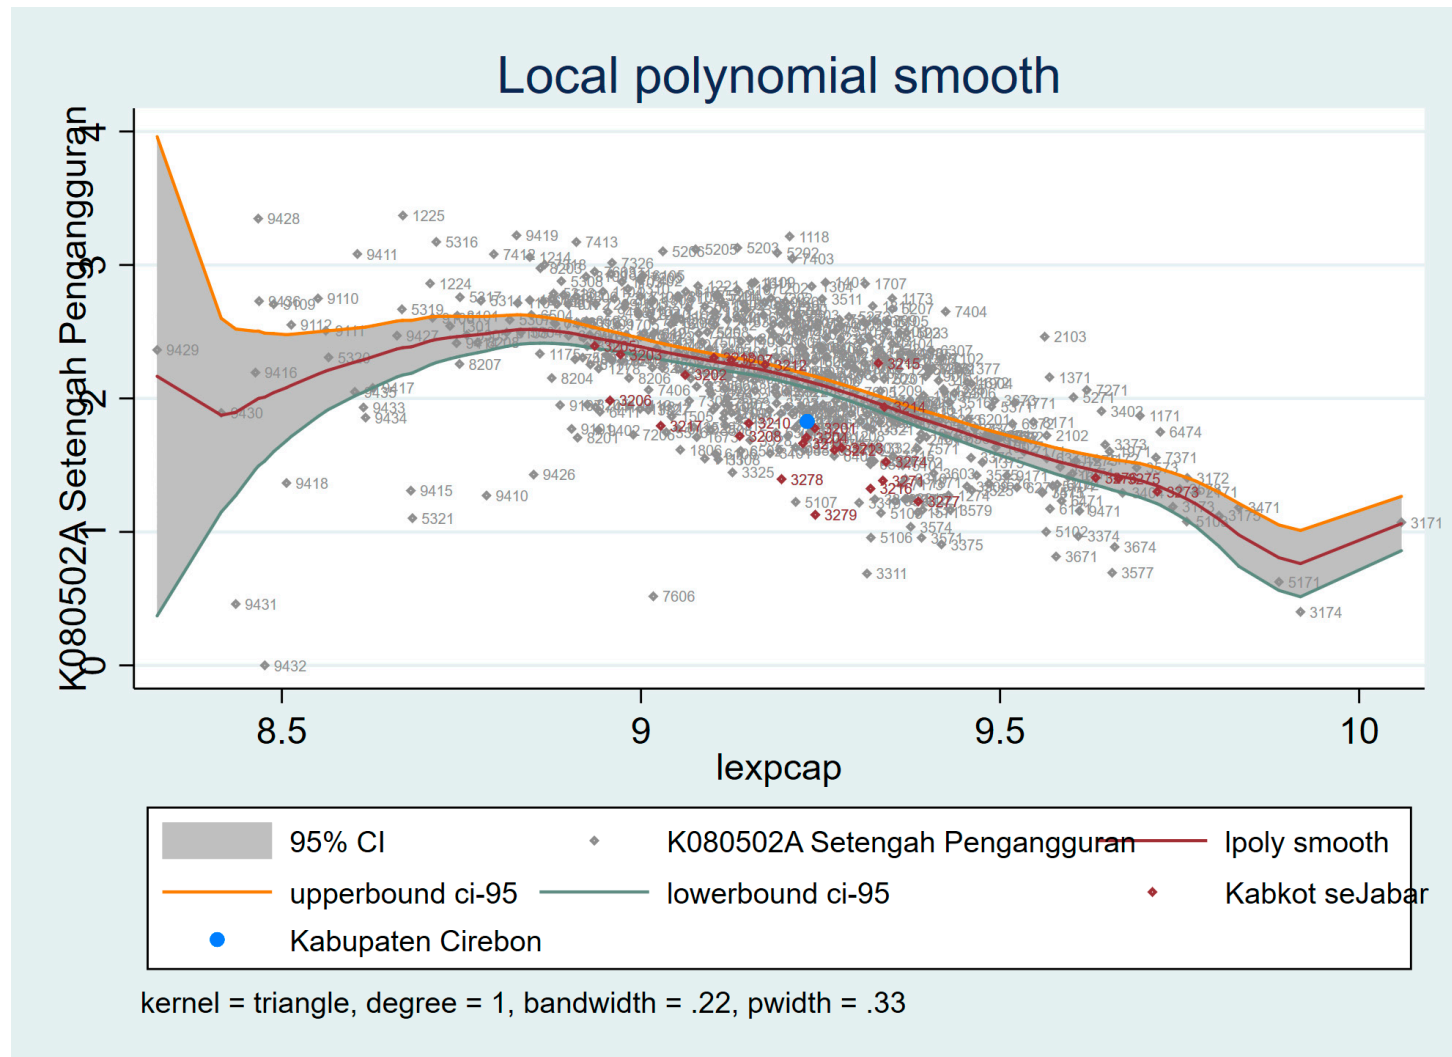

**Figure S46. Performance of Underemployment Rate on per capita income**

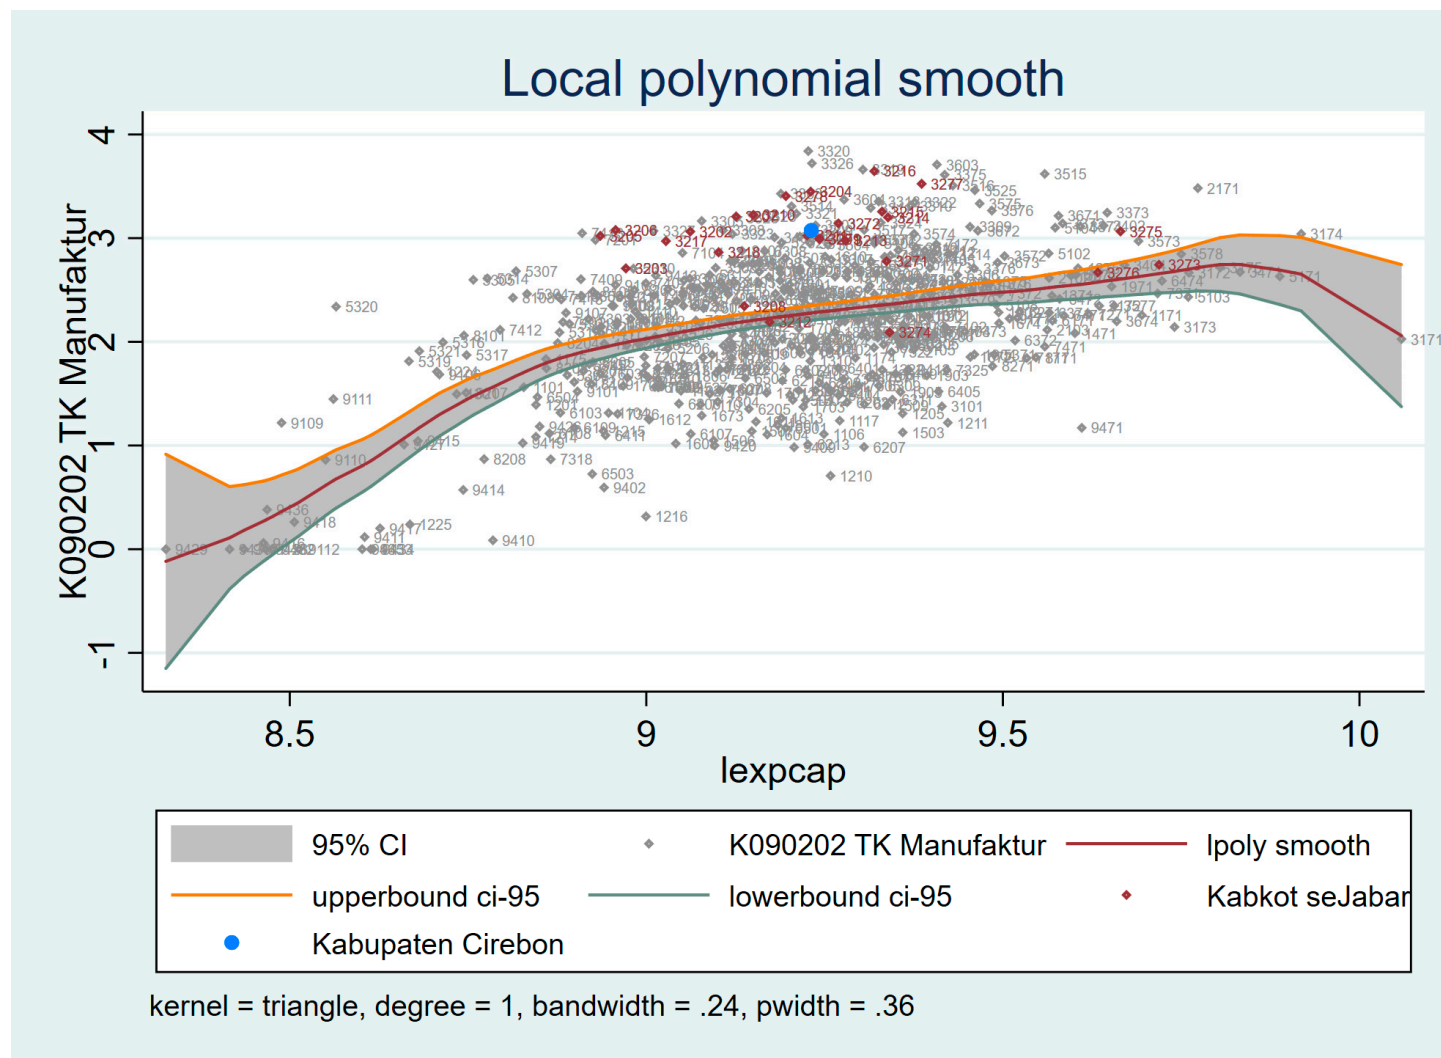

**Figure S47. Performance of Manufacturing Employment on per capita income**

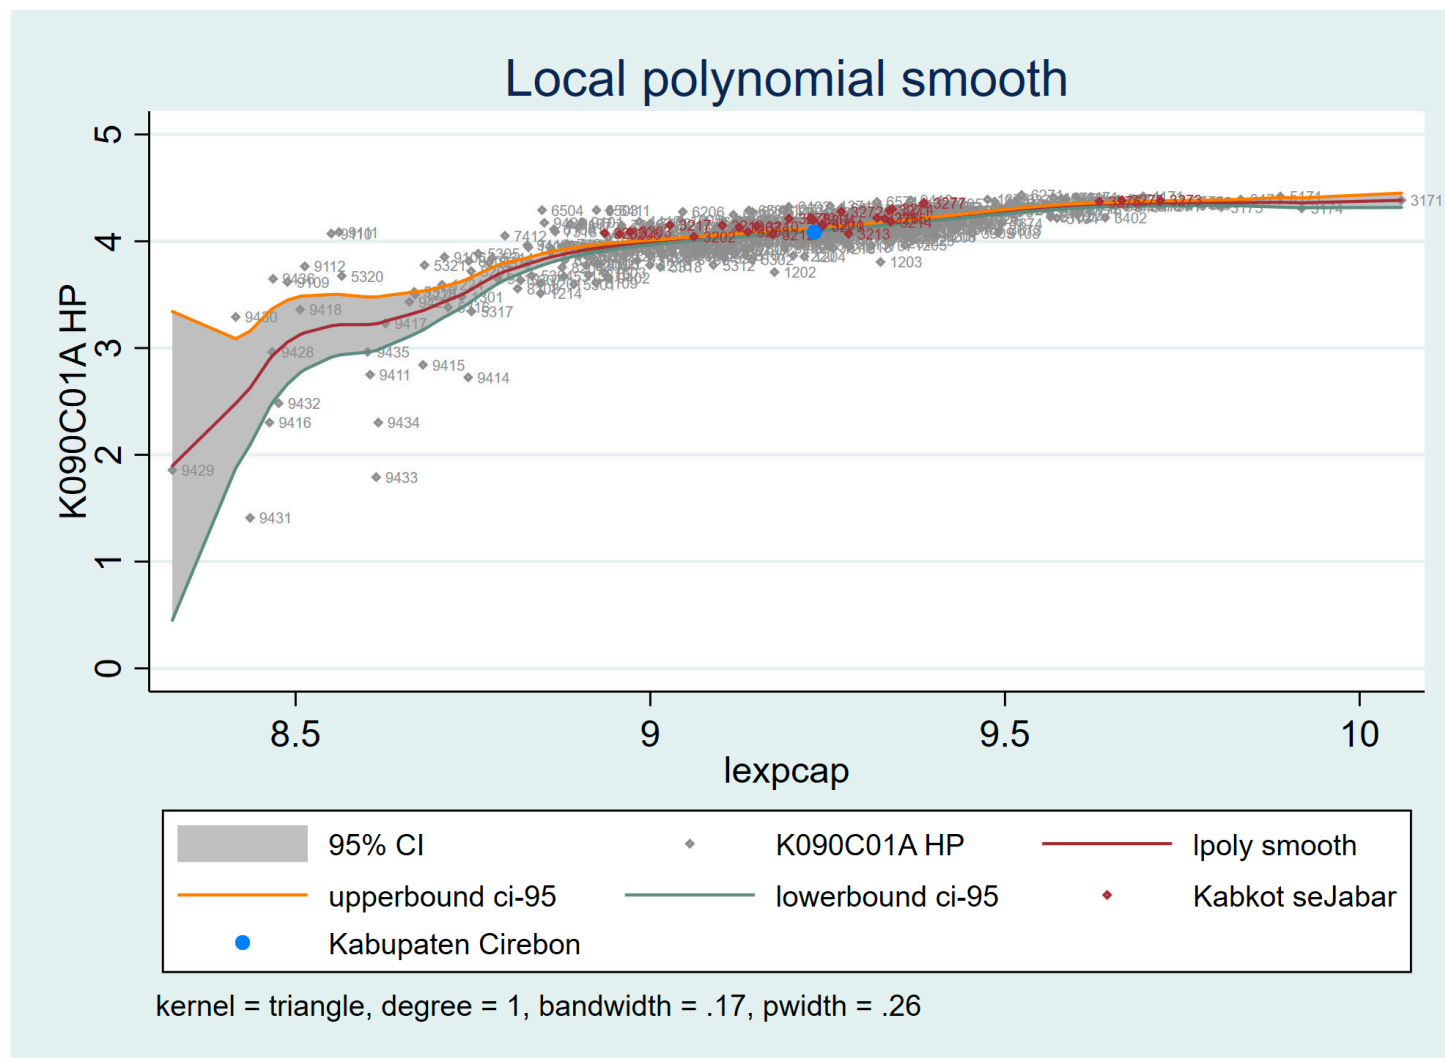

**Figure S48. Performance of Mobile Phone on per capita income**

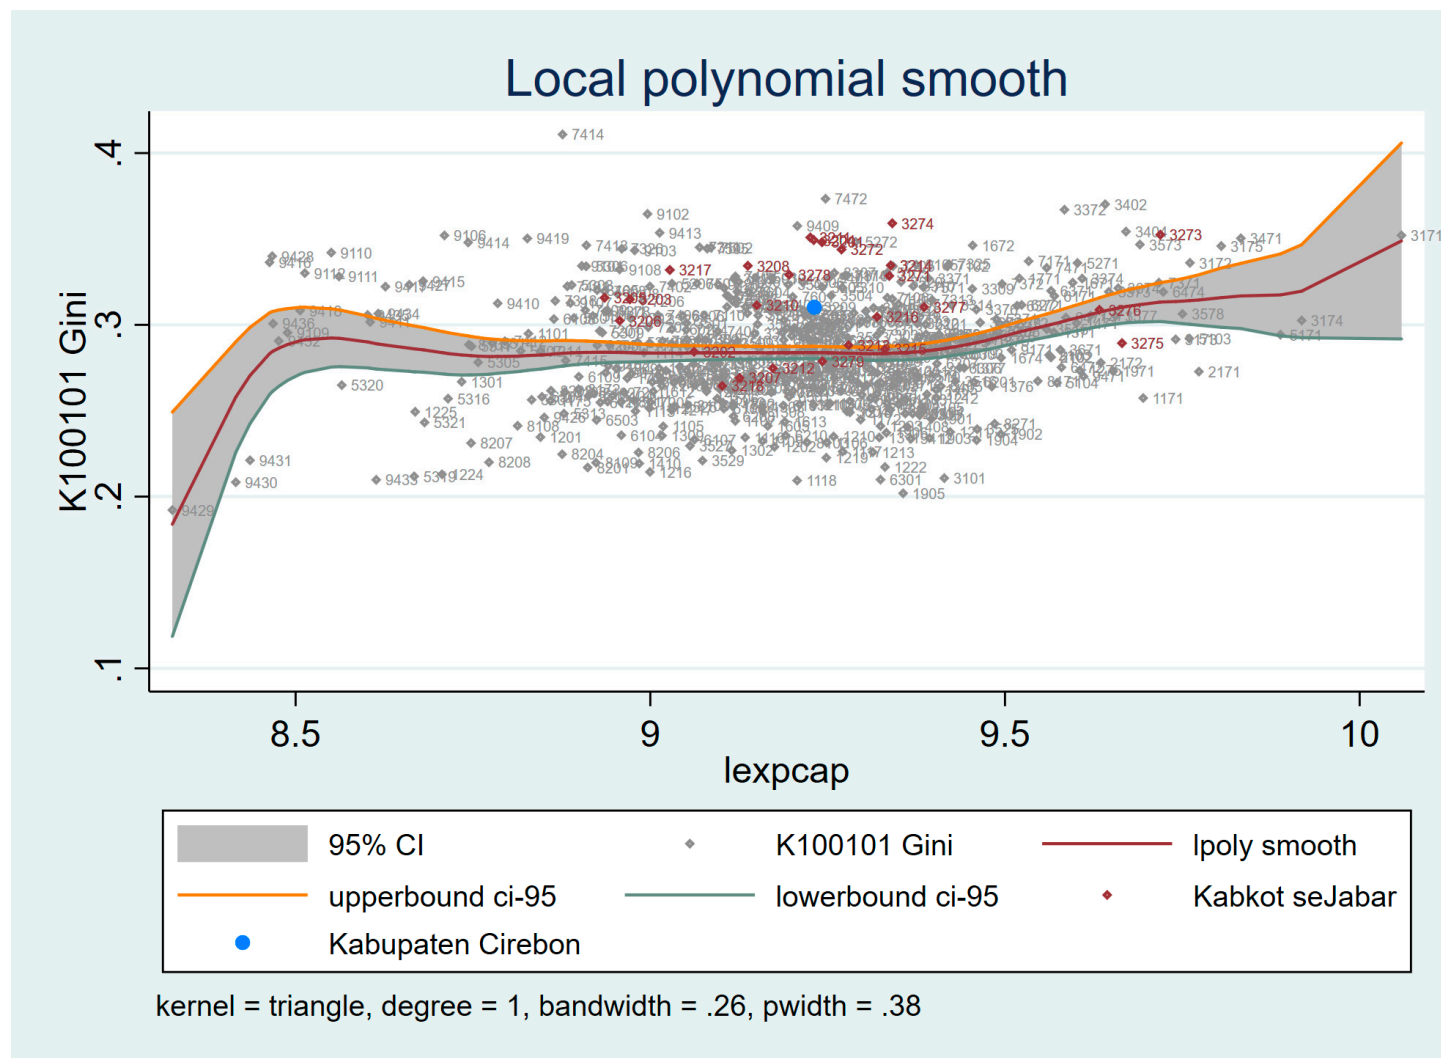

**Figure S49. Performance of Gini Coefficient on per capita income**

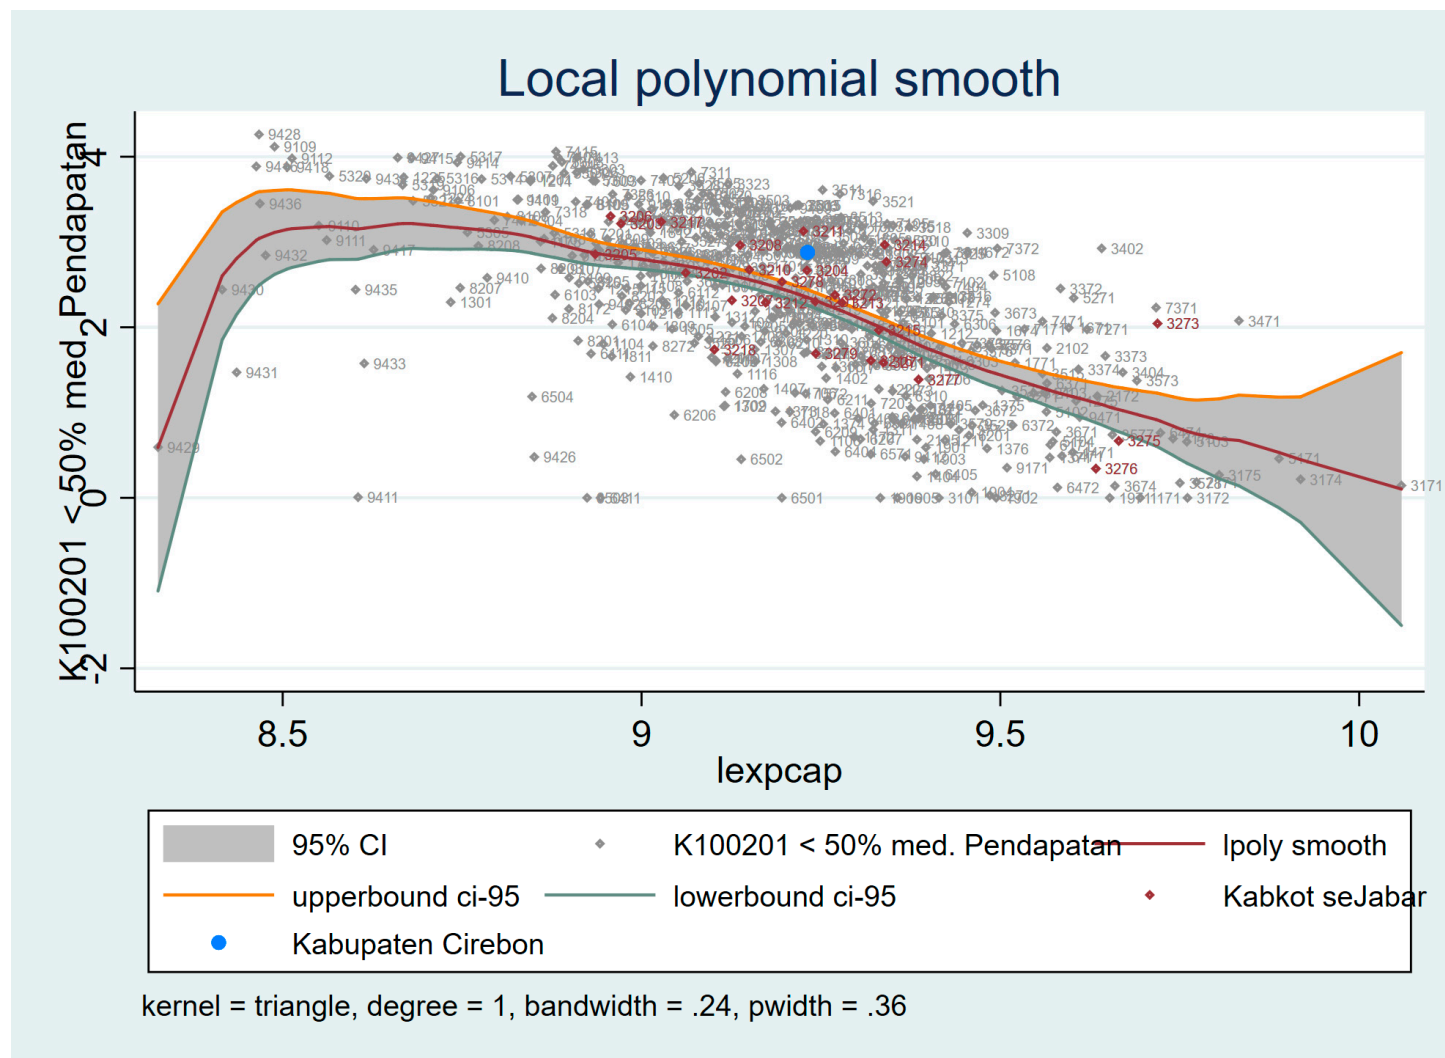

**Figure S50. Performance of < 50% Median income on per capita income**



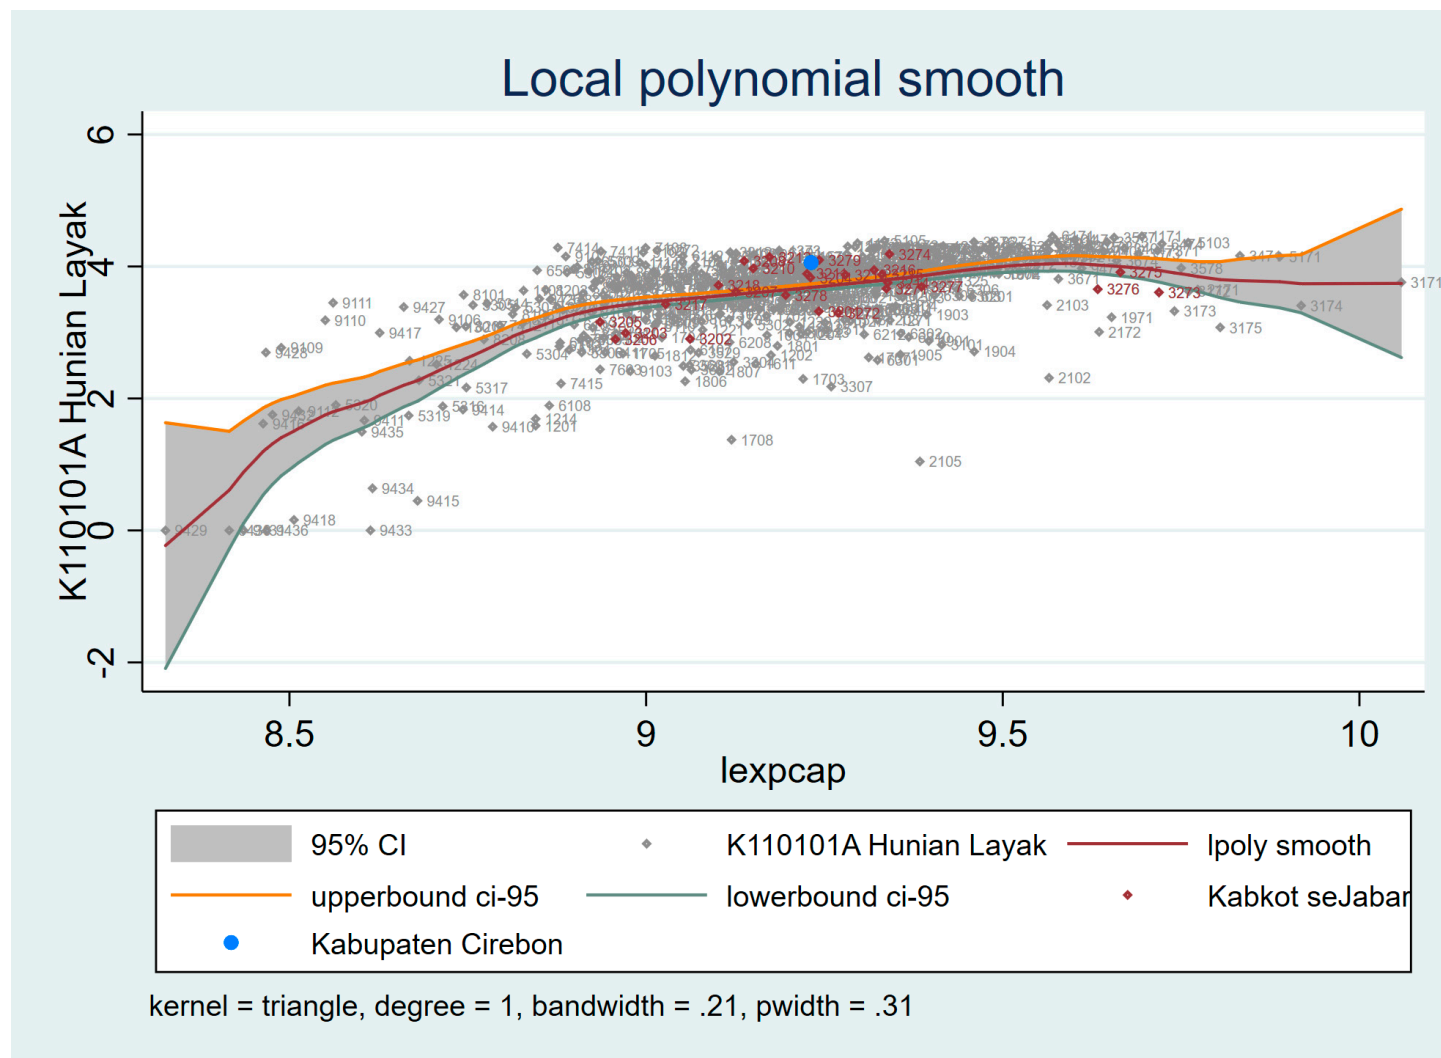

**Figure S51. Performance of Adequate Housing on per capita income**

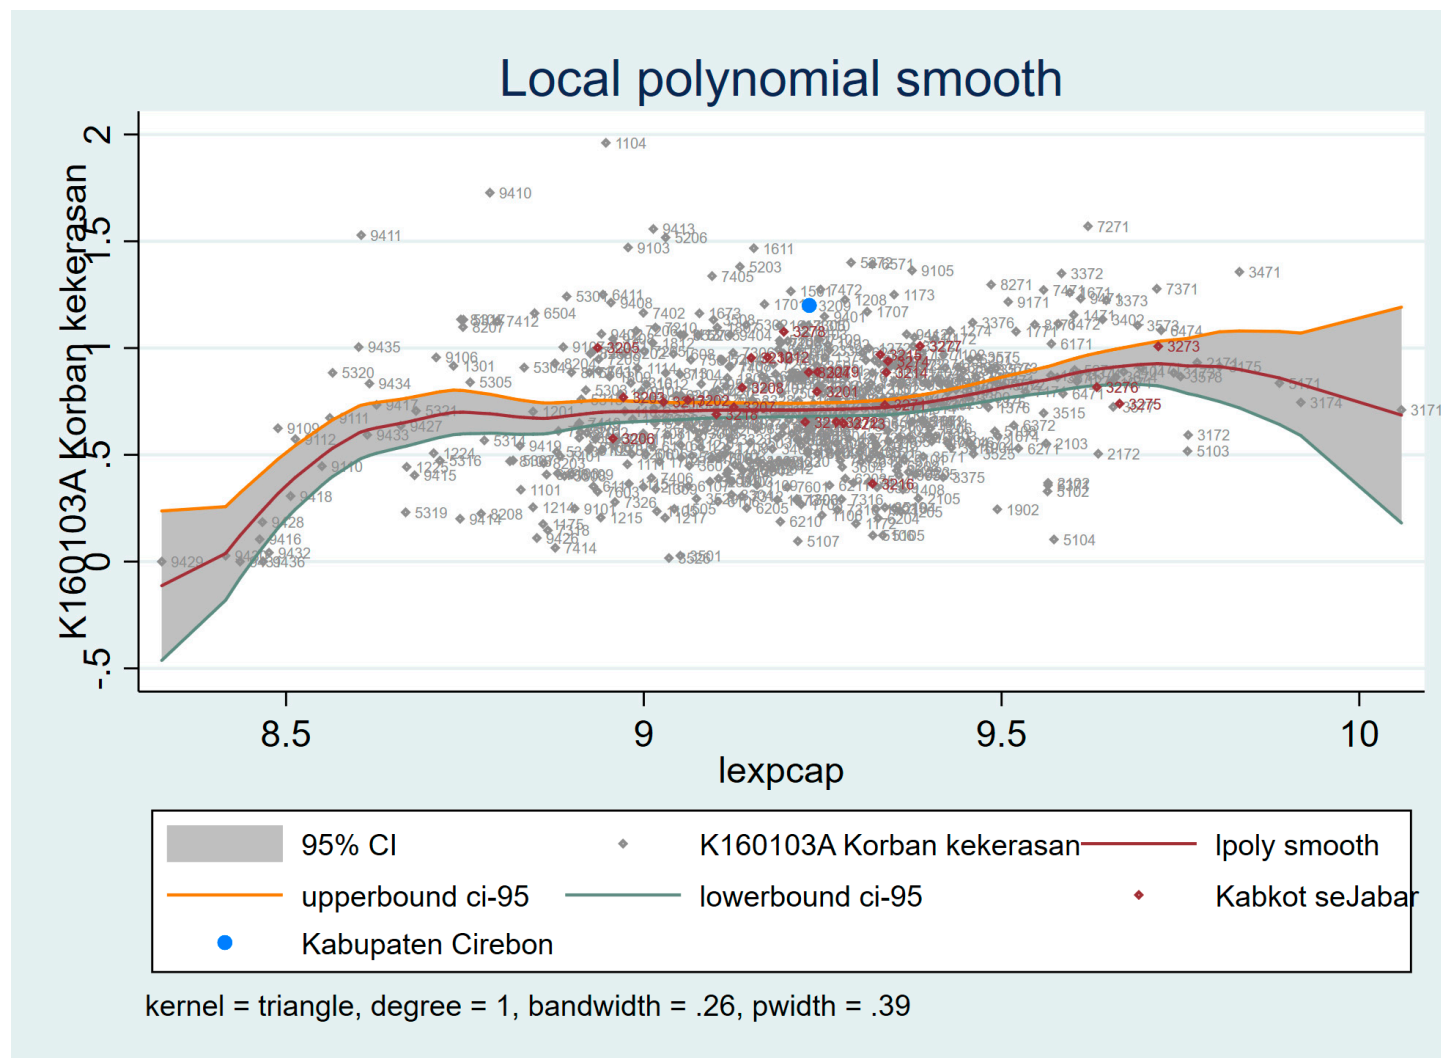

**Figure S52. Performance of Physical Violence on per capita income**

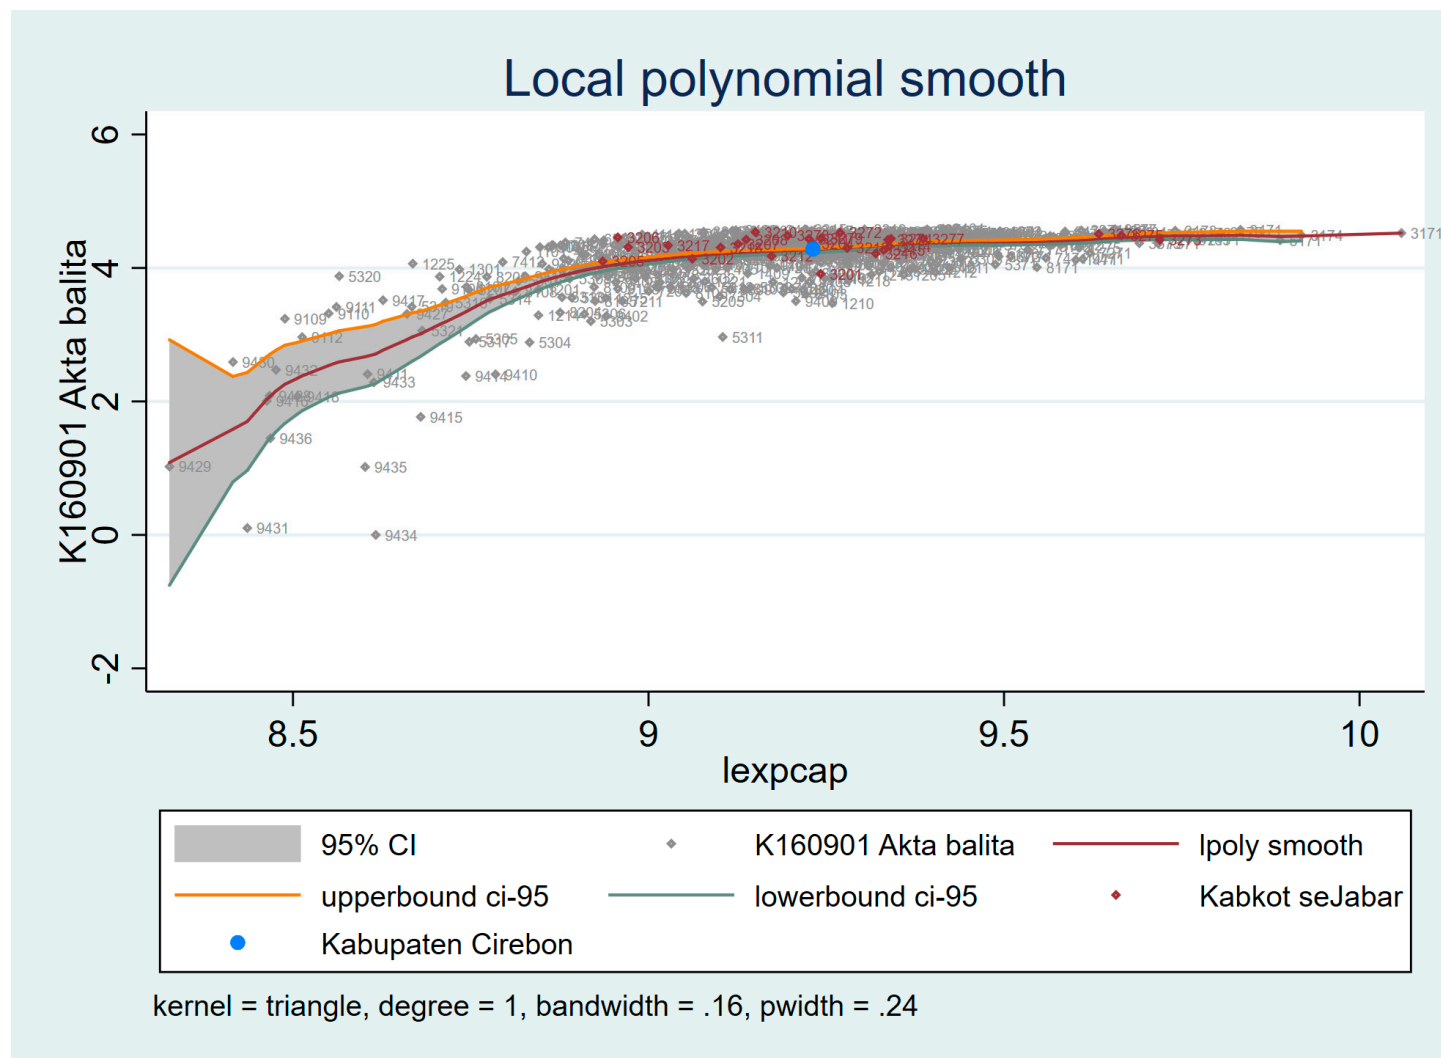

**Figure S53. Performance of Birth Certificate < 5 on per capita income**

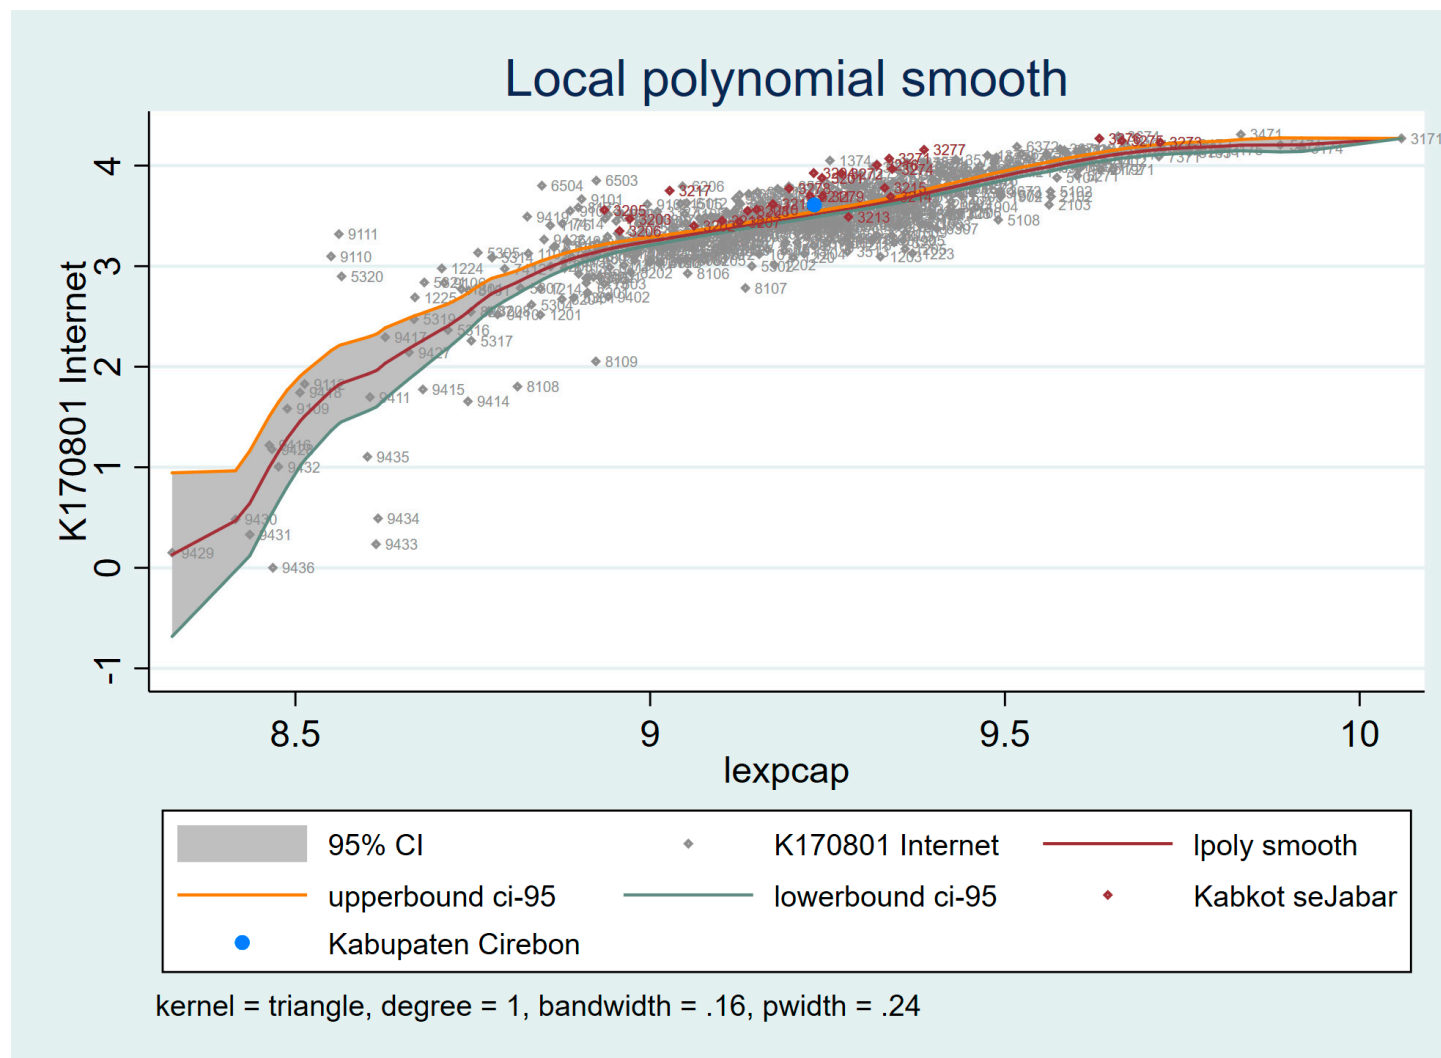

**Figure S54. Performance of Internet on per capita income**
